# Supplementary material
Source: Research Square preprint supplement (doi:10.21203/rs.3.rs-10374394/v1)
Supplement: Supplementary file 1 [file 22cef30afd9e9b61fdb72a80.xlsx]

## Sheet: Unique_sarcoma_interactions_fil
Entity	Unique_interaction
aRMS	WNT9A->FZD7_LRP6
aRMS	NLGN1->NRXN3
aRMS	NECTIN3->CADM1
aRMS	NECTIN1->CD96
aRMS	MXRA5->CD69
aRMS	LRIG1->EGFR
aRMS	LAMA1->ITGA1
aRMS	LAMA1->CD44
aRMS	IGF2->ITGA6_ITGB4
aRMS	HSPG2->LRP1
aRMS	FGF13->EGFR
aRMS	FAM3C->LIFR
aRMS	ADAM10->TSPAN14
aRMS	ADAM10->NOTCH2
aRMS	ADAM10->GPNMB
eRMS	VCAN->TLR1
eRMS	VCAN->ITGB1
eRMS	THBS4->CD47
eRMS	THBS4->CD36
eRMS	TFPI->LRP1
eRMS	SPON2->ITGA4
eRMS	SERPINF1->PLXDC2
eRMS	SEMA6A->PLXNA4
eRMS	SEMA6A->PLXNA2
eRMS	SEMA3A->NRP2
eRMS	SEMA3A->NRP1_PLXNA2
eRMS	PDGFC->PDGFRA
eRMS	PAM->FAP
eRMS	PAM->DPP4
eRMS	NRG1->MS4A4A
eRMS	NRG1->LGR4
eRMS	NCAM1->NCAM2
eRMS	NCAM1->FGFR1
eRMS	MDK->SORL1
eRMS	MDK->NOTCH2
eRMS	MDK->LRP1
eRMS	LGALS1->CD69
eRMS	LAMA2->RPSA
eRMS	LAMA2->ITGA9_ITGB1
eRMS	LAMA2->ITGA1
eRMS	LAMA2->CD44
eRMS	JAM3->ITGB1
eRMS	IL1RAPL1->PTPRS
eRMS	IGF2->ITGAV_ITGB3
eRMS	IGF2->IGF2R
eRMS	IGF2->IGF1R
eRMS	GPC3->UNC5C
eRMS	GPC3->LRP1
eRMS	GPC3->IGF1R
eRMS	GNAS->TSHR
eRMS	GNAS->ADRB2
eRMS	FSTL1->DIP2A
eRMS	FN1->ITGAV_ITGB1
eRMS	FN1->ITGA5_ITGB1
eRMS	EFNA5->EPHA3
eRMS	DCN->TLR2
eRMS	COL6A3->ITGA9_ITGB1
eRMS	COL6A3->ITGA1_ITGB1
eRMS	COL6A2->ITGA1_ITGB1
eRMS	COL6A1->ITGA1_ITGB1
eRMS	COL4A5->CD44
eRMS	COL4A2->ITGA9_ITGB1
eRMS	COL4A2->ITGA1_ITGB1
eRMS	COL4A2->CD93
eRMS	COL4A2->CD44
eRMS	COL4A1->ITGA1_ITGB1
eRMS	COL4A1->CD93
eRMS	COL4A1->CD47
eRMS	COL4A1->CD44
eRMS	COL3A1->ITGA2_ITGB1
eRMS	COL3A1->ITGA11_ITGB1
eRMS	COL2A1->CD44
eRMS	COL1A2->CD36
eRMS	COL1A1->CD36
eRMS	COL18A1->PTPRS
eRMS	CCN1->TLR2
eRMS	CALM1->KCNQ5
eRMS	CALM1->INSR
eRMS	B2M->KLRC1
eRMS	APP->NGFR
eRMS	ANXA2->TLR2
eRMS	ADAM12->ITGB1
Ewing	SLIT2->DCC
Ewing	RIMS1->SLC18A2
Ewing	HMGB1->TLR4
Ewing	HLA-B->CD8B
Ewing	HLA-A->CD8B
Ewing	FN1->SDC2
Ewing	FN1->ROBO4
Ewing	FN1->ITGA2
Ewing	EFNB1->EPHB1
Ewing	CD99->PILRA
Ewing	B2M->KLRC2
Osteo	VEGFB->ADRB2
Osteo	VEGFA->NRP1
Osteo	VEGFA->CD44
Osteo	TNC->PTPRB
Osteo	THBS2->NOTCH3
Osteo	THBS2->ITGA6
Osteo	THBS2->ITGA4
Osteo	THBS1->LRP1
Osteo	THBS1->ITGA6
Osteo	TGFB1->TGFBR3
Osteo	SPP1->CD44
Osteo	SLIT3->ROBO2
Osteo	SLIT3->ROBO1
Osteo	SLIT2->ROBO2
Osteo	SLIT2->ROBO1
Osteo	SERPINE2->LRP1
Osteo	PTN->SDC2
Osteo	PTN->PTPRS
Osteo	PTN->NCL
Osteo	MEPE->PHEX
Osteo	FN1->FLT4
Osteo	FARP2->PLXNA4
Osteo	COL5A2->ITGA2_ITGB1
Osteo	COL5A2->ITGA10_ITGB1
Osteo	COL5A1->ITGA2_ITGB1
Osteo	COL5A1->ITGA10_ITGB1
Osteo	COL3A1->ITGA10_ITGB1
Osteo	COL3A1->DDR2
Osteo	COL1A2->SDC1
Osteo	COL1A2->ITGB3
Osteo	COL1A2->ITGA3_ITGB1
Osteo	COL1A2->ITGA10_ITGB1
Osteo	COL1A1->SDC1
Osteo	COL1A1->ITGA3_ITGB1
Osteo	COL1A1->ITGA2_ITGB1
Osteo	COL1A1->ITGA10_ITGB1
Osteo	COL1A1->FLT4
Osteo	COL1A1->DDR2
Osteo	COL1A1->DDR1
Osteo	COL12A1->ITGA2_ITGB1
Osteo	COL12A1->ITGA10_ITGB1
Osteo	COL11A1->ITGA2_ITGB1
Osteo	COL11A1->ITGA11_ITGB1
Osteo	COL11A1->ITGA10_ITGB1
Osteo	COL11A1->ITGA1_ITGB1
Osteo	CNTN4->PTPRG
Osteo	CKLF->CCR4
Osteo	A2M->LRP1

## Sheet: Sarcoma_shared_interactions
,0,source,target
202,LGALS1->PTPRC,LGALS1,PTPRC
115,HMGB1->TLR2,HMGB1,TLR2
20,GNAS->PTGDR,GNAS,PTGDR
148,COPA->CD74,COPA,CD74
104,APP->NOTCH2,APP,NOTCH2
161,APP->CD74,APP,CD74
81,ADAM10->CADM1,ADAM10,CADM1
