# Supplementary material
Source: Research Square preprint supplement (doi:10.21203/rs.3.rs-10374394/v1)
Supplement: Supplementary file 2 [file 383819d0ac9d17d45f6df4d3.xlsx]

## Sheet: cancer_rank_genes_groups_full
group,gene,scores,logfoldchanges,pvals,pvals_adj
ASPS,GPNMB,160.92136,9.521767,0.0,0.0
ASPS,IGFN1,155.49529,12.842175,0.0,0.0
ASPS,PSAP,154.6567,5.4301944,0.0,0.0
ASPS,UPP1,146.94139,10.050507,0.0,0.0
ASPS,PTGDS,145.52528,6.197797,0.0,0.0
ASPS,CFAP61,143.76195,9.411323,0.0,0.0
ASPS,NPB,141.74983,9.398471,0.0,0.0
ASPS,AHNAK2,141.28497,7.137771,0.0,0.0
ASPS,SULT1C2,140.22676,11.423011,0.0,0.0
ASPS,PRUNE2,136.30052,6.151063,0.0,0.0
ASPS,RAB7A,135.45164,5.020583,0.0,0.0
ASPS,LINC01933,134.99954,9.328027,0.0,0.0
ASPS,ABCB5,133.77087,8.153496,0.0,0.0
ASPS,HLA-A,130.5516,4.4058566,0.0,0.0
ASPS,CYP17A1,130.23355,14.234414,0.0,0.0
ASPS,PPARGC1A,129.98807,6.1385174,0.0,0.0
ASPS,HHATL,129.79842,10.2358,0.0,0.0
ASPS,PFKFB2,129.75162,7.986484,0.0,0.0
ASPS,SLC20A1,128.42557,5.2408204,0.0,0.0
ASPS,FNIP2,126.819405,5.737934,0.0,0.0
ASPS,PRKAG2,125.796646,5.133077,0.0,0.0
ASPS,MLPH,124.77088,7.444012,0.0,0.0
ASPS,LINC01705,123.82664,10.9673395,0.0,0.0
ASPS,SCARB1,123.60581,4.905673,0.0,0.0
ASPS,CPNE5,122.48501,7.5174236,0.0,0.0
ASPS,VEGFA,122.33515,4.4810357,0.0,0.0
ASPS,MBP,122.31352,6.391587,0.0,0.0
ASPS,SV2B,121.68166,6.4487677,0.0,0.0
ASPS,CAST,121.28499,4.3287764,0.0,0.0
ASPS,ANGPTL2,120.63911,5.7945023,0.0,0.0
ASPS,NEAT1,120.62638,3.639773,0.0,0.0
ASPS,ABR,120.39277,4.887735,0.0,0.0
ASPS,SOD2,119.57617,4.0575633,0.0,0.0
ASPS,MIR29B2CHG,117.07166,5.7873516,0.0,0.0
ASPS,LINC02257,115.95136,10.836945,0.0,0.0
ASPS,NMRK2,115.49415,9.035591,0.0,0.0
ASPS,TRIM63,115.36293,9.286065,0.0,0.0
ASPS,ASAH1,113.474,4.493756,0.0,0.0
ASPS,BABAM2,113.35914,4.244458,0.0,0.0
ASPS,ITGBL1,113.18689,5.8190284,0.0,0.0
ASPS,RRAGD,111.21385,4.9753103,0.0,0.0
ASPS,TACC2,110.794,4.662665,0.0,0.0
ASPS,MCF2L,109.82272,4.5945034,0.0,0.0
ASPS,MCF2L2,109.04322,5.7944336,0.0,0.0
ASPS,LRRK2,108.9523,5.5327606,0.0,0.0
ASPS,IGF2R,108.39703,3.2154381,0.0,0.0
ASPS,MYO16,108.15982,4.127657,0.0,0.0
ASPS,ADGRG1,107.91424,7.8875318,0.0,0.0
ASPS,CHST11,107.84694,4.248481,0.0,0.0
ASPS,PNLIPRP3,107.48698,13.667344,0.0,0.0
ASPS,PLA2G7,106.6783,9.036082,0.0,0.0
ASPS,FAM124A,106.59705,4.941293,0.0,0.0
ASPS,LINC01266,106.4149,4.542736,0.0,0.0
ASPS,SH3TC1,105.17565,6.8511558,0.0,0.0
ASPS,GRN,104.60797,4.293044,0.0,0.0
ASPS,LINC01655,104.16538,11.231471,0.0,0.0
ASPS,SLC19A2,104.12965,4.1998296,0.0,0.0
ASPS,PFKP,103.40937,4.037293,0.0,0.0
ASPS,FBXO32,102.306244,3.8383298,0.0,0.0
ASPS,ABCB9,101.20979,4.880351,0.0,0.0
ASPS,STX3,101.11783,5.6774254,0.0,0.0
ASPS,PMP22,101.10916,3.8704166,0.0,0.0
ASPS,BAIAP2,100.7876,4.1250744,0.0,0.0
ASPS,HSD17B14,100.46575,6.416844,0.0,0.0
ASPS,PDE4D,100.24155,3.4230387,0.0,0.0
ASPS,ROR2,100.12953,4.286727,0.0,0.0
ASPS,OLFML2A,99.81499,4.0624743,0.0,0.0
ASPS,HSPA12A,99.48873,3.8653717,0.0,0.0
ASPS,KCNN2,99.43083,6.86084,0.0,0.0
ASPS,GREB1,99.37413,3.8470893,0.0,0.0
ASPS,KCNH1,99.20657,5.8179417,0.0,0.0
ASPS,CLIP4,98.337425,3.731616,0.0,0.0
ASPS,ABHD2,98.30486,3.9625032,0.0,0.0
ASPS,SLC9A3-AS1,97.525826,4.5752115,0.0,0.0
ASPS,CPXM2,97.441086,5.2319,0.0,0.0
ASPS,CLN8,97.353134,4.466069,0.0,0.0
ASPS,PTPRM,96.72881,3.261743,0.0,0.0
ASPS,LRMDA,96.63027,3.7960882,0.0,0.0
ASPS,NABP1,95.89552,4.1074405,0.0,0.0
ASPS,MTUS1,95.415054,3.7812245,0.0,0.0
ASPS,PLAAT3,94.83606,6.092914,0.0,0.0
ASPS,NAPA,94.73967,3.7917151,0.0,0.0
ASPS,ZMIZ1,94.24128,3.042789,0.0,0.0
ASPS,MELTF,94.13985,5.2408705,0.0,0.0
ASPS,LINC02240,93.8364,6.1304173,0.0,0.0
ASPS,IP6K3,93.823006,5.9948664,0.0,0.0
ASPS,SQSTM1,93.307106,3.040495,0.0,0.0
ASPS,TTN,93.287346,3.3560662,0.0,0.0
ASPS,HHAT,93.208694,3.9120057,0.0,0.0
ASPS,ALPK3,92.75522,3.48951,0.0,0.0
ASPS,LINC01594,92.73936,9.141099,0.0,0.0
ASPS,CNTN3,92.674576,4.422354,0.0,0.0
ASPS,EVL,92.583206,3.1473722,0.0,0.0
ASPS,NPC1,92.51998,3.4514763,0.0,0.0
ASPS,GPD2,92.29934,3.509501,0.0,0.0
ASPS,TNS3,92.25261,3.0464242,0.0,0.0
ASPS,PPFIBP2,91.822525,4.3385243,0.0,0.0
ASPS,ANO4,91.445404,3.8711984,0.0,0.0
ASPS,SLC25A13,91.36328,3.14711,0.0,0.0
ASPS,DST,91.150375,2.4839869,0.0,0.0
ASPS,GSDME,90.87092,4.8619776,0.0,0.0
ASPS,HLA-F-AS1,90.46309,6.0074964,0.0,0.0
ASPS,BIRC7,89.83972,8.139046,0.0,0.0
ASPS,SLC8A2,89.8226,5.065783,0.0,0.0
ASPS,TIMP2,89.38765,2.77875,0.0,0.0
ASPS,PLXNA4,89.26355,3.7721171,0.0,0.0
ASPS,EXOC3,89.18247,3.3691933,0.0,0.0
ASPS,CDS2,89.02,3.3022237,0.0,0.0
ASPS,HLA-G,89.00726,8.924264,0.0,0.0
ASPS,KIFC3,88.97558,3.915022,0.0,0.0
ASPS,EPS15L1,88.90636,3.106949,0.0,0.0
ASPS,PLD1,88.899605,4.4118237,0.0,0.0
ASPS,GALNT18,88.85223,3.952445,0.0,0.0
ASPS,GLIS3,88.68882,3.850343,0.0,0.0
ASPS,GRIK4,88.3549,5.0795507,0.0,0.0
ASPS,HIF1A,88.2375,2.8444939,0.0,0.0
ASPS,TPRG1,88.133446,4.2866673,0.0,0.0
ASPS,GRAMD1B,86.93346,3.1319785,0.0,0.0
ASPS,SPIRE1,86.87074,2.9409163,0.0,0.0
ASPS,ARHGAP22,86.386604,4.993904,0.0,0.0
ASPS,CLU,86.264725,4.6640563,0.0,0.0
ASPS,GNS,86.23035,3.359797,0.0,0.0
ASPS,PSD3,86.13254,2.7466245,0.0,0.0
ASPS,SLC16A7,86.090836,4.1743875,0.0,0.0
ASPS,VWC2,86.008644,5.35365,0.0,0.0
ASPS,LINC02249,85.562706,4.6184783,0.0,0.0
ASPS,STX7,85.454926,3.2385893,0.0,0.0
ASPS,ENOSF1,85.23247,2.6720407,0.0,0.0
ASPS,ZNF91,85.05138,2.4588327,0.0,0.0
ASPS,SPSB1,84.89401,4.603228,0.0,0.0
ASPS,ZMIZ1-AS1,84.889275,4.9633775,0.0,0.0
ASPS,CTSL,84.842514,4.2589507,0.0,0.0
ASPS,CPVL,84.81679,3.7787983,0.0,0.0
ASPS,GNPTAB,84.23347,3.6397629,0.0,0.0
ASPS,TMOD1,84.08108,5.6125364,0.0,0.0
ASPS,FN3K,84.077095,4.152894,0.0,0.0
ASPS,CHKA,84.0632,3.1109319,0.0,0.0
ASPS,FYB2,83.733696,8.83788,0.0,0.0
ASPS,CD63,83.3748,2.4583292,0.0,0.0
ASPS,BHLHE40,82.969154,3.7275832,0.0,0.0
ASPS,CST3,82.85957,3.0172155,0.0,0.0
ASPS,KCND2,82.83803,4.882891,0.0,0.0
ASPS,GULP1,82.83483,3.4630733,0.0,0.0
ASPS,ITPK1,82.7953,3.2653584,0.0,0.0
ASPS,HECTD1,82.59708,2.3033333,0.0,0.0
ASPS,ATP2A3,82.379425,5.317687,0.0,0.0
ASPS,EEF2K,82.1939,3.1319957,0.0,0.0
ASPS,ST3GAL5,82.13604,3.1844187,0.0,0.0
ASPS,SCD,81.84889,2.9364016,0.0,0.0
ASPS,DIP2C,81.65333,2.3431396,0.0,0.0
ASPS,TMEM233,81.58347,4.934732,0.0,0.0
ASPS,FAM53B,81.441025,3.0821698,0.0,0.0
ASPS,MYL9,80.965034,3.5836592,0.0,0.0
ASPS,AS3MT,80.77915,3.8019726,0.0,0.0
ASPS,NEB,80.70441,2.7343702,0.0,0.0
ASPS,SLC41A2,80.68595,4.326683,0.0,0.0
ASPS,MREG,80.57327,3.6380985,0.0,0.0
ASPS,EDIL3,80.56749,3.0199955,0.0,0.0
ASPS,PLA2R1,80.531845,3.967219,0.0,0.0
ASPS,FHIT,80.398094,2.5560758,0.0,0.0
ASPS,ELOVL7,80.29384,6.2575026,0.0,0.0
ASPS,GCGR,80.27018,9.255817,0.0,0.0
ASPS,CTTN,79.63945,2.5592446,0.0,0.0
ASPS,TRAF5,79.59585,2.9706633,0.0,0.0
ASPS,APOE,79.59045,2.7155466,0.0,0.0
ASPS,ESR2,79.16804,4.9624867,0.0,0.0
ASPS,RHOQ,79.11665,2.9527743,0.0,0.0
ASPS,CKMT2,79.110146,5.1395817,0.0,0.0
ASPS,HK2,78.64015,4.6435294,0.0,0.0
ASPS,FHOD3,78.60005,3.8114974,0.0,0.0
ASPS,COL4A4,78.44782,5.6513934,0.0,0.0
ASPS,LINC02154,78.29113,8.425306,0.0,0.0
ASPS,LHCGR,78.07852,9.412393,0.0,0.0
ASPS,PARM1,77.72223,2.518276,0.0,0.0
ASPS,DAAM2,77.58765,2.9863222,0.0,0.0
ASPS,KCNE4,77.47592,3.9083283,0.0,0.0
ASPS,FOXP2,77.42517,2.6555517,0.0,0.0
ASPS,ITPR2,77.41684,2.8282423,0.0,0.0
ASPS,KIF13B,77.03632,2.8126032,0.0,0.0
ASPS,HLA-B,76.804695,2.7083983,0.0,0.0
ASPS,RASEF,76.750084,5.437682,0.0,0.0
ASPS,TPCN1,76.34869,2.7146635,0.0,0.0
ASPS,LPIN1,76.299576,2.9986413,0.0,0.0
ASPS,PXN,75.87756,2.8264058,0.0,0.0
ASPS,MACROD1,75.83536,2.7243874,0.0,0.0
ASPS,SACS,75.718254,2.4346354,0.0,0.0
ASPS,C10orf90,75.71305,5.2513824,0.0,0.0
ASPS,SLC41A3,75.621605,3.8020113,0.0,0.0
ASPS,GBE1,75.61345,2.8741164,0.0,0.0
ASPS,LOXL4,75.51402,4.339232,0.0,0.0
ASPS,CPEB1,75.362076,5.836511,0.0,0.0
ASPS,EVC,75.323586,2.546477,0.0,0.0
ASPS,TRIO,75.14565,1.960883,0.0,0.0
ASPS,SLC47A1,75.13002,4.0284038,0.0,0.0
ASPS,TMEM266,75.00681,6.1686206,0.0,0.0
ASPS,MLXIP,74.96082,2.5748723,0.0,0.0
ASPS,C7orf57,74.8507,9.6066675,0.0,0.0
ASPS,VWCE,74.759995,4.4282594,0.0,0.0
ASPS,TLK1,74.69654,2.1839972,0.0,0.0
ASPS,CHFR,74.62172,2.820325,0.0,0.0
ASPS,LDLRAD3,74.26308,2.513361,0.0,0.0
ASPS,ESR1,74.14693,4.253832,0.0,0.0
ASPS,SLC29A1,74.01877,3.2279606,0.0,0.0
ASPS,MROH1,73.99826,2.8317459,0.0,0.0
ASPS,PPM1H,73.963615,2.6984217,0.0,0.0
ASPS,ALDH1A2,73.890396,3.5266228,0.0,0.0
ASPS,AMZ1,73.89,5.7260594,0.0,0.0
ASPS,SLC15A4,73.82332,3.0488703,0.0,0.0
ASPS,OSBP2,73.81552,3.956693,0.0,0.0
ASPS,ANK2,73.502945,2.3290272,0.0,0.0
ASPS,TRIM25,73.47904,2.8027706,0.0,0.0
ASPS,NXN,73.26681,2.5548933,0.0,0.0
ASPS,JAZF1,73.055016,2.565843,0.0,0.0
ASPS,ACP5,72.88792,5.9917417,0.0,0.0
ASPS,BCAT2,72.81734,4.1503544,0.0,0.0
ASPS,NDRG4,72.58754,5.388603,0.0,0.0
ASPS,MDK,72.32448,2.3218014,0.0,0.0
ASPS,ACSL4,72.171165,2.666657,0.0,0.0
ASPS,ARFGEF2,72.13909,2.1740096,0.0,0.0
ASPS,ADCY8,71.92722,5.8231807,0.0,0.0
ASPS,TRAK1,71.764175,2.386727,0.0,0.0
ASPS,TBC1D14,71.74741,2.5135972,0.0,0.0
ASPS,ABLIM1,71.70589,2.3676734,0.0,0.0
ASPS,TANGO2,71.608696,3.847538,0.0,0.0
ASPS,RORC,71.600464,5.975285,0.0,0.0
ASPS,EPB41L4A,71.58802,3.7649975,0.0,0.0
ASPS,SLC2A13,71.47832,3.0055916,0.0,0.0
ASPS,ZFPM2,71.446655,2.3162403,0.0,0.0
ASPS,IFI16,71.11853,2.3437257,0.0,0.0
ASPS,R3HCC1L,71.0866,2.535344,0.0,0.0
ASPS,PRICKLE2,71.020325,2.548544,0.0,0.0
ASPS,ACSS3,70.98998,2.7995021,0.0,0.0
ASPS,OSBPL1A,70.865906,2.2401304,0.0,0.0
ASPS,ANKRD6,70.8089,2.6646638,0.0,0.0
ASPS,KCNMB2-AS1,70.77972,3.9431295,0.0,0.0
ASPS,OPTN,70.77596,2.9071963,0.0,0.0
ASPS,L3MBTL4,70.750015,2.7055001,0.0,0.0
ASPS,DDX60L,70.72362,3.0397594,0.0,0.0
ASPS,LARP4,70.605774,2.1614084,0.0,0.0
ASPS,KIF16B,70.55788,2.583312,0.0,0.0
ASPS,CRYAB,70.416595,3.250955,0.0,0.0
ASPS,BRI3,70.34087,2.4011905,0.0,0.0
ASPS,CORO6,70.24274,4.1861634,0.0,0.0
ASPS,MGST1,70.203545,3.8424382,0.0,0.0
ASPS,LINC00882,70.14842,2.8571317,0.0,0.0
ASPS,TNRC6A,70.09702,1.8752335,0.0,0.0
ASPS,ABCC4,70.09398,2.8852942,0.0,0.0
ASPS,PDLIM5,70.013214,2.3846514,0.0,0.0
ASPS,CORO1C,69.9119,2.2843802,0.0,0.0
ASPS,EZR,69.868774,2.20123,0.0,0.0
ASPS,VPS13D,69.62706,2.170304,0.0,0.0
ASPS,ANKRD36,69.58657,2.0787344,0.0,0.0
ASPS,LINC00456,69.53974,10.556532,0.0,0.0
ASPS,SORBS3,69.53475,3.4903862,0.0,0.0
ASPS,SNX10,69.43474,4.7096095,0.0,0.0
ASPS,SAMD12,69.23026,3.7620013,0.0,0.0
ASPS,SLC25A16,69.1499,2.549419,0.0,0.0
ASPS,IQSEC1,69.061066,2.5584857,0.0,0.0
ASPS,MYOF,69.04845,3.2235963,0.0,0.0
ASPS,OSBPL6,68.99937,2.8096516,0.0,0.0
ASPS,CTSK,68.98851,3.2888417,0.0,0.0
ASPS,CCDC93,68.96877,2.2892973,0.0,0.0
ASPS,ARHGAP42,68.89253,2.4530263,0.0,0.0
ASPS,HLA-C,68.875595,2.6086092,0.0,0.0
ASPS,DNAH1,68.787926,4.1029687,0.0,0.0
ASPS,SH3BP5,68.743286,2.973548,0.0,0.0
ASPS,RBM47,68.58978,3.6117225,0.0,0.0
ASPS,OSBPL10,68.4895,4.157105,0.0,0.0
ASPS,AHRR,68.48232,3.705439,0.0,0.0
ASPS,NEK6,68.39162,2.351395,0.0,0.0
ASPS,MSC-AS1,68.38688,2.1361842,0.0,0.0
ASPS,LINC00472,68.36589,2.269624,0.0,0.0
ASPS,FLCN,68.266205,2.5910332,0.0,0.0
ASPS,ATP6V1B2,68.20071,2.4177778,0.0,0.0
ASPS,TBC1D1,68.19072,2.3754263,0.0,0.0
ASPS,TACC1,68.16367,2.068833,0.0,0.0
ASPS,AATBC,68.05508,7.3992214,0.0,0.0
ASPS,VPS53,67.4426,2.0703895,0.0,0.0
ASPS,TRPM7,67.38666,1.9826673,0.0,0.0
ASPS,PAM,67.37915,2.1403031,0.0,0.0
ASPS,MIR4435-2HG,67.33545,3.16272,0.0,0.0
ASPS,IL6R,67.3068,3.9403446,0.0,0.0
ASPS,WIPI1,67.25799,3.476452,0.0,0.0
ASPS,STEAP3,67.19981,2.8574827,0.0,0.0
ASPS,DOCK8,67.16803,3.7731404,0.0,0.0
ASPS,NNT,66.98698,2.1063442,0.0,0.0
ASPS,DANT2,66.48195,2.3141026,0.0,0.0
ASPS,NPC2,66.47055,3.1201463,0.0,0.0
ASPS,CELF2,66.46219,2.1461828,0.0,0.0
ASPS,CD55,66.2794,3.4441867,0.0,0.0
ASPS,THSD7A,66.22796,2.8743906,0.0,0.0
ASPS,EYA4,66.17184,2.1249404,0.0,0.0
ASPS,GRK3,66.16122,2.6021817,0.0,0.0
ASPS,KPTN,65.972626,4.182813,0.0,0.0
ASPS,SNX29,65.97055,2.160929,0.0,0.0
ASPS,S100A6,65.93285,2.1376057,0.0,0.0
ASPS,ZMAT3,65.69139,2.4477088,0.0,0.0
ASPS,RNF144A,65.56533,2.4187706,0.0,0.0
ASPS,CPQ,65.42866,2.151635,0.0,0.0
ASPS,OTULINL,65.395615,4.311724,0.0,0.0
ASPS,SP100,65.36691,2.4868312,0.0,0.0
ASPS,MED15,65.28913,2.0190399,0.0,0.0
ASPS,ECHDC2,65.28106,2.769263,0.0,0.0
ASPS,PSG8-AS1,65.25988,8.722719,0.0,0.0
ASPS,RILPL1,65.01576,2.4862394,0.0,0.0
ASPS,SNCB,65.00444,5.5934305,0.0,0.0
ASPS,APP,64.96237,1.6926626,0.0,0.0
ASPS,CPNE8,64.89204,2.6162941,0.0,0.0
ASPS,HEXA,64.879196,2.365754,0.0,0.0
ASPS,PATL1,64.82073,2.9297035,0.0,0.0
ASPS,CR1,64.71499,8.080887,0.0,0.0
ASPS,MAP3K2,64.69448,1.8199141,0.0,0.0
ASPS,ZBTB43,64.672585,2.79131,0.0,0.0
ASPS,MICU3,64.61197,2.5265212,0.0,0.0
ASPS,NAGLU,64.58344,2.8327625,0.0,0.0
ASPS,MAOB,64.44999,4.6458726,0.0,0.0
ASPS,NSMCE2,64.44918,1.8502423,0.0,0.0
ASPS,RIMS2,64.37044,3.8054242,0.0,0.0
ASPS,TBC1D8,64.30284,2.3066137,0.0,0.0
ASPS,BIN1,64.24809,2.4432542,0.0,0.0
ASPS,RBPMS,64.244934,3.0424259,0.0,0.0
ASPS,B2M,64.223946,1.6642915,0.0,0.0
ASPS,ABCA1,64.16177,2.1864874,0.0,0.0
ASPS,IFRD1,64.152016,2.3495593,0.0,0.0
ASPS,PTPN3,64.08216,3.085744,0.0,0.0
ASPS,LINC00504,63.964027,3.9948168,0.0,0.0
ASPS,ASAP1,63.889687,1.7518971,0.0,0.0
ASPS,PHKA1,63.864204,3.0193706,0.0,0.0
ASPS,SPART,63.85428,1.9860258,0.0,0.0
ASPS,KATNAL2,63.696053,2.320416,0.0,0.0
ASPS,SIPA1L3,63.67347,2.1868203,0.0,0.0
ASPS,GPAT4,63.667885,2.364492,0.0,0.0
ASPS,SLC28A3,63.662163,11.133787,0.0,0.0
ASPS,PACS1,63.648685,1.9945621,0.0,0.0
ASPS,RNF13,63.47395,2.1248634,0.0,0.0
ASPS,SLIT3,63.441277,2.2659528,0.0,0.0
ASPS,EPS8,63.241245,2.4474888,0.0,0.0
ASPS,PCBD1,63.233856,3.2031696,0.0,0.0
ASPS,STXBP1,63.098454,2.500682,0.0,0.0
ASPS,PDXDC1,63.024746,1.9966254,0.0,0.0
ASPS,CTSD,62.93428,2.6448395,0.0,0.0
ASPS,RGS3,62.90112,3.1364312,0.0,0.0
ASPS,CHPT1,62.59813,2.5888212,0.0,0.0
ASPS,ME3,62.56171,2.7645729,0.0,0.0
ASPS,PLEKHA6,62.535378,3.1493406,0.0,0.0
ASPS,HS6ST1,62.49269,2.4584987,0.0,0.0
ASPS,LINC01606,62.4835,3.5335948,0.0,0.0
ASPS,WIPF3,62.455276,3.1999145,0.0,0.0
ASPS,PLEKHM1,62.451485,2.5101588,0.0,0.0
ASPS,INHBE,62.29303,8.183054,0.0,0.0
ASPS,KCNQ4,62.154972,5.385628,0.0,0.0
ASPS,PROS1,62.136932,3.0611355,0.0,0.0
ASPS,SEPTIN3,62.12072,4.764184,0.0,0.0
ASPS,C19orf12,62.115826,2.7153172,0.0,0.0
ASPS,EGFR,62.104378,2.1293736,0.0,0.0
ASPS,RAB38,61.712837,5.5331035,0.0,0.0
ASPS,ARHGEF10L,61.600597,2.915224,0.0,0.0
ASPS,CCDC13,61.18899,5.7475095,0.0,0.0
ASPS,SYT14,61.155518,2.510759,0.0,0.0
ASPS,RNLS,61.070107,3.5099385,0.0,0.0
ASPS,ACACB,61.006027,1.8719856,0.0,0.0
ASPS,ITGB1BP1,60.98603,2.1765122,0.0,0.0
ASPS,SLC43A2,60.94695,4.0443096,0.0,0.0
ASPS,ZNF208,60.84176,2.9903545,0.0,0.0
ASPS,SUCLA2,60.748783,2.0525146,0.0,0.0
ASPS,RBMS3,60.745667,1.849135,0.0,0.0
ASPS,USP53,60.7448,2.2934792,0.0,0.0
ASPS,KIF21A,60.74069,2.6891751,0.0,0.0
ASPS,NTSR2,60.478867,10.93639,0.0,0.0
ASPS,SGCZ,60.44162,4.0156927,0.0,0.0
ASPS,NR6A1,60.431828,2.16824,0.0,0.0
ASPS,ABHD6,60.382793,2.064313,0.0,0.0
ASPS,TMEM117,60.36806,1.9182026,0.0,0.0
ASPS,TULP4,60.30033,1.7208229,0.0,0.0
ASPS,SLC35F3,60.253796,3.7918277,0.0,0.0
ASPS,MTCL1,60.112053,2.7304573,0.0,0.0
ASPS,LAMP1,60.108543,2.2772312,0.0,0.0
ASPS,PVT1,60.1024,1.7688806,0.0,0.0
ASPS,PRKG1,60.022232,1.814059,0.0,0.0
ASPS,PCGF5,59.913834,2.2231774,0.0,0.0
ASPS,MTA3,59.896797,1.7937726,0.0,0.0
ASPS,ZNF438,59.790676,2.092308,0.0,0.0
ASPS,LINC00607,59.744133,4.604485,0.0,0.0
ASPS,APOL2,59.689957,3.0201163,0.0,0.0
ASPS,CYTH1,59.5933,1.8572924,0.0,0.0
ASPS,LINC00278,59.566776,4.5324802,0.0,0.0
ASPS,PLXDC2,59.4061,1.8741242,0.0,0.0
ASPS,DDR2,59.401524,1.817776,0.0,0.0
ASPS,CLN6,59.363323,2.6830013,0.0,0.0
ASPS,TMTC1,59.340614,1.9184278,0.0,0.0
ASPS,RASGEF1B,59.33308,1.7499688,0.0,0.0
ASPS,HK1,59.18971,2.296284,0.0,0.0
ASPS,RNF19A,59.168915,1.7444763,0.0,0.0
ASPS,RAB27A,59.16833,2.7262511,0.0,0.0
ASPS,RALGPS1,59.12374,2.5098202,0.0,0.0
ASPS,BEAN1,59.08354,5.890805,0.0,0.0
ASPS,SNTB1,58.963734,2.23165,0.0,0.0
ASPS,LRRC1,58.870975,2.4759867,0.0,0.0
ASPS,UBAP2L,58.808044,1.6509182,0.0,0.0
ASPS,EPB41L3,58.789684,2.6522238,0.0,0.0
ASPS,STAU2,58.762894,1.774956,0.0,0.0
ASPS,SLC37A1,58.731327,3.3929005,0.0,0.0
ASPS,ATP13A3,58.707108,1.8636111,0.0,0.0
ASPS,CYB561A3,58.67404,3.4599214,0.0,0.0
ASPS,STAMBPL1,58.66472,3.9565485,0.0,0.0
ASPS,CPEB3,58.658794,2.2649922,0.0,0.0
ASPS,FGF13,58.622154,2.1111703,0.0,0.0
ASPS,SMYD3,58.607872,1.7069418,0.0,0.0
ASPS,BHLHE41,58.330727,4.0035696,0.0,0.0
ASPS,HRK,58.25071,4.5153055,0.0,0.0
ASPS,OGDH,58.193474,1.8171933,0.0,0.0
ASPS,ADAMTS2,58.114582,2.2772212,0.0,0.0
ASPS,OSTM1,57.998165,2.7362554,0.0,0.0
ASPS,STS,57.94661,2.5187898,0.0,0.0
ASPS,LYST,57.918846,2.018847,0.0,0.0
ASPS,TMCC3,57.917934,2.388452,0.0,0.0
ASPS,ANKRD9,57.879074,4.02488,0.0,0.0
ASPS,ABHD12,57.86561,2.4479923,0.0,0.0
ASPS,BCL2L1,57.859272,2.421303,0.0,0.0
ASPS,TSKU,57.828922,3.5379317,0.0,0.0
ASPS,TRAK2,57.81503,2.0981574,0.0,0.0
ASPS,INSYN2B,57.772514,5.548367,0.0,0.0
ASPS,SLC25A27,57.757893,2.6303542,0.0,0.0
ASPS,NCOA7,57.73627,2.8021789,0.0,0.0
ASPS,UTRN,57.688667,1.6588466,0.0,0.0
ASPS,NR4A3,57.654625,2.9956303,0.0,0.0
ASPS,TRPC3,57.58625,5.430208,0.0,0.0
ASPS,MIR34AHG,57.57059,2.2884789,0.0,0.0
ASPS,DCLK1,57.56541,1.9773295,0.0,0.0
ASPS,PWWP2B,57.565178,3.7905216,0.0,0.0
ASPS,SLK,57.510925,1.9326432,0.0,0.0
ASPS,FRY,57.466152,1.8058876,0.0,0.0
ASPS,CPEB2,57.45726,1.7019364,0.0,0.0
ASPS,FAM219A,57.450005,2.4875321,0.0,0.0
ASPS,ATP1B1,57.43393,2.3681114,0.0,0.0
ASPS,NPIPB5,57.415493,1.8598105,0.0,0.0
ASPS,SLIT2,57.383663,1.91261,0.0,0.0
ASPS,COL4A5,57.374016,1.9188375,0.0,0.0
ASPS,PIEZO2,57.35422,2.3305528,0.0,0.0
ASPS,VWA5B1,57.299416,6.295248,0.0,0.0
ASPS,CAPG,57.26062,4.259373,0.0,0.0
ASPS,ADCY6,57.23707,2.577143,0.0,0.0
ASPS,NT5DC3,57.20789,2.708584,0.0,0.0
ASPS,ANXA4,57.122353,2.2244062,0.0,0.0
ASPS,LSS,57.120945,2.005825,0.0,0.0
ASPS,PHKB,57.11852,1.823713,0.0,0.0
ASPS,EPDR1,57.10505,2.7559454,0.0,0.0
ASPS,CRYM,57.024868,6.3661895,0.0,0.0
ASPS,SH3D19,56.836056,1.9991549,0.0,0.0
ASPS,HEATR5A,56.79366,2.2515297,0.0,0.0
ASPS,B4GALT5,56.75342,1.9230102,0.0,0.0
ASPS,LINC01091,56.734184,3.5945451,0.0,0.0
ASPS,MICAL1,56.70206,2.2036383,0.0,0.0
ASPS,COL4A3,56.664944,4.9902215,0.0,0.0
ASPS,KIAA1671,56.659996,2.537757,0.0,0.0
ASPS,SLC16A10,56.634422,2.4306574,0.0,0.0
ASPS,GDNF-AS1,56.530304,2.7637327,0.0,0.0
ASPS,LIN7A,56.494915,2.9891586,0.0,0.0
ASPS,CLIP1,56.322395,1.8328202,0.0,0.0
ASPS,GPR157,56.31844,5.2253404,0.0,0.0
ASPS,C1GALT1,55.995564,2.0156937,0.0,0.0
ASPS,GLB1,55.93169,2.199221,0.0,0.0
ASPS,LINC00702,55.925964,6.6939716,0.0,0.0
ASPS,PXDC1,55.880478,2.583846,0.0,0.0
ASPS,FNDC3B,55.87803,1.6069198,0.0,0.0
ASPS,CTSA,55.870846,2.3486743,0.0,0.0
ASPS,ABHD18,55.859962,2.1139786,0.0,0.0
ASPS,RIOK3,55.79466,1.8628336,0.0,0.0
ASPS,PPP1R14C,55.79131,3.0430174,0.0,0.0
ASPS,N4BP2L1,55.77572,2.891828,0.0,0.0
ASPS,LINC02099,55.714447,7.8452115,0.0,0.0
ASPS,DENND1B,55.6458,2.0208604,0.0,0.0
ASPS,LINC01579,55.60083,5.9919147,0.0,0.0
ASPS,RUNX1,55.47334,1.5757807,0.0,0.0
ASPS,MITF,55.32735,2.5162988,0.0,0.0
ASPS,RAB32,55.27358,4.298975,0.0,0.0
ASPS,ARAP2,55.22211,3.686433,0.0,0.0
ASPS,GFPT2,55.168236,3.695976,0.0,0.0
ASPS,LINC02646,55.145683,3.5116572,0.0,0.0
ASPS,PPFIA1,55.139076,1.6267666,0.0,0.0
ASPS,GLRX3,55.119553,1.9620603,0.0,0.0
ASPS,UAP1L1,55.057438,3.6135964,0.0,0.0
ASPS,DISC1,54.999374,1.6327095,0.0,0.0
ASPS,OXNAD1,54.977013,2.166184,0.0,0.0
ASPS,CLEC16A,54.932014,1.9186025,0.0,0.0
ASPS,CTSB,54.90158,2.1415527,0.0,0.0
ASPS,MAML2,54.830666,1.8740691,0.0,0.0
ASPS,CST2,54.70075,10.453703,0.0,0.0
ASPS,CHD4,54.697186,1.609048,0.0,0.0
ASPS,MYO6,54.6654,1.9314264,0.0,0.0
ASPS,AAK1,54.637783,1.6965227,0.0,0.0
ASPS,UBAC1,54.613758,2.2871516,0.0,0.0
ASPS,KCNIP3,54.587833,3.3715723,0.0,0.0
ASPS,C21orf91,54.550953,2.8196795,0.0,0.0
ASPS,RASSF8,54.530388,2.311217,0.0,0.0
ASPS,PODNL1,54.506084,5.512918,0.0,0.0
ASPS,DPP4,54.436855,5.319838,0.0,0.0
ASPS,SCPEP1,54.433456,2.8599575,0.0,0.0
ASPS,NIPAL2,54.39151,2.89984,0.0,0.0
ASPS,HDAC2-AS2,54.382572,2.879648,0.0,0.0
ASPS,GOLGA4,54.378254,1.4367589,0.0,0.0
ASPS,ZHX2,54.33237,1.8431484,0.0,0.0
ASPS,OXCT1,54.321087,2.0073152,0.0,0.0
ASPS,SLFN5,54.17094,3.0100574,0.0,0.0
ASPS,LPP,54.162228,1.536885,0.0,0.0
ASPS,SLC25A40,54.04012,2.0719113,0.0,0.0
ASPS,DDIT3,54.009293,3.121038,0.0,0.0
ASPS,STT3B,53.998466,1.6210443,0.0,0.0
ASPS,ESCO1,53.92001,2.1268275,0.0,0.0
ASPS,TLE4,53.901455,1.805002,0.0,0.0
ASPS,SYNE1,53.795574,1.4910874,0.0,0.0
ASPS,UBR5,53.791294,1.3581989,0.0,0.0
ASPS,ZBED3-AS1,53.78202,2.3622189,0.0,0.0
ASPS,AGO4,53.74158,2.1322305,0.0,0.0
ASPS,RNF213,53.7361,1.4747089,0.0,0.0
ASPS,PTCHD1-AS,53.722443,2.5408638,0.0,0.0
ASPS,MAGI2,53.70505,1.6987044,0.0,0.0
ASPS,MFSD11,53.52343,2.2631965,0.0,0.0
ASPS,FNIP1,53.45099,1.4916538,0.0,0.0
ASPS,NT5DC1,53.352993,2.0670245,0.0,0.0
ASPS,C4orf54,53.240437,3.171638,0.0,0.0
ASPS,AFF1,53.236572,1.4719265,0.0,0.0
ASPS,CHCHD6,53.1969,2.040659,0.0,0.0
ASPS,GABARAPL2,53.186646,2.3147538,0.0,0.0
ASPS,TXNRD1,53.183968,1.7832054,0.0,0.0
ASPS,STPG2-AS1,53.07159,8.308799,0.0,0.0
ASPS,WASHC5,53.033474,1.8482332,0.0,0.0
ASPS,NAV1,53.029327,1.5388044,0.0,0.0
ASPS,VWA8,52.989525,1.5744895,0.0,0.0
ASPS,PHACTR2,52.979412,2.0042636,0.0,0.0
ASPS,TRANK1,52.977627,2.3187032,0.0,0.0
ASPS,FST,52.86447,3.2747684,0.0,0.0
ASPS,BNC2,52.857777,1.547386,0.0,0.0
ASPS,MUC20,52.84196,3.4054413,0.0,0.0
ASPS,STAT2,52.80421,1.7203614,0.0,0.0
ASPS,ZCCHC24,52.78032,2.268323,0.0,0.0
ASPS,ACOT11,52.77122,2.1440117,0.0,0.0
ASPS,PPARGC1B,52.76195,2.8234801,0.0,0.0
ASPS,TCIRG1,52.75883,3.8247664,0.0,0.0
ASPS,CASC15,52.699764,1.5356727,0.0,0.0
ASPS,IVNS1ABP,52.67431,1.4716083,0.0,0.0
ASPS,GOT1,52.65502,2.810224,0.0,0.0
ASPS,P4HB,52.640327,1.5168319,0.0,0.0
ASPS,LINC00589,52.619274,6.1032343,0.0,0.0
ASPS,FANCL,52.587036,1.6534059,0.0,0.0
ASPS,LINC02471,52.57465,9.838644,0.0,0.0
ASPS,PLPP3,52.53911,2.2830868,0.0,0.0
ASPS,TVP23C,52.519073,1.6649698,0.0,0.0
ASPS,CLYBL,52.504536,2.1352174,0.0,0.0
ASPS,SUV39H1,52.493916,4.8191566,0.0,0.0
ASPS,PPM1A,52.48313,1.643897,0.0,0.0
ASPS,ARHGEF3,52.442596,1.7005173,0.0,0.0
ASPS,LAMA3,52.432934,2.8178039,0.0,0.0
ASPS,SVEP1,52.302296,3.0274434,0.0,0.0
ASPS,A2M,52.300003,2.2315505,0.0,0.0
ASPS,CYB5A,52.259743,2.9311676,0.0,0.0
ASPS,DAB2,52.238228,2.8065243,0.0,0.0
ASPS,TPM1,52.206707,1.5992354,0.0,0.0
ASPS,RNF43,52.204605,5.353698,0.0,0.0
ASPS,C1R,52.181183,4.6007247,0.0,0.0
ASPS,BRF1,52.15925,1.9121337,0.0,0.0
ASPS,MYO18A,52.109993,1.7842433,0.0,0.0
ASPS,PIEZO1,52.049393,2.0379148,0.0,0.0
ASPS,SYNPO2,52.03833,2.6196132,0.0,0.0
ASPS,FGD4,52.010635,2.0445344,0.0,0.0
ASPS,RRBP1,51.95328,1.4102393,0.0,0.0
ASPS,SLC5A10,51.950188,7.883438,0.0,0.0
ASPS,CHODL,51.767574,3.4091299,0.0,0.0
ASPS,ADCK1,51.73016,2.647208,0.0,0.0
ASPS,ZFPM2-AS1,51.68097,3.1737273,0.0,0.0
ASPS,SLC25A12,51.66329,1.7607996,0.0,0.0
ASPS,MIPEP,51.6407,1.9443668,0.0,0.0
ASPS,CERT1,51.4924,1.5906988,0.0,0.0
ASPS,SPTLC3,51.468315,2.5032625,0.0,0.0
ASPS,DTNA,51.422543,1.7480928,0.0,0.0
ASPS,ANO9,51.393463,3.1335359,0.0,0.0
ASPS,VAT1,51.383385,2.8201406,0.0,0.0
ASPS,MSRA,51.371677,1.560342,0.0,0.0
ASPS,KDM4C,51.34278,1.5647875,0.0,0.0
ASPS,SDC4,51.28362,3.3589392,0.0,0.0
ASPS,IDH3A,51.28296,2.3697739,0.0,0.0
ASPS,GPR135,51.24192,2.310203,0.0,0.0
ASPS,ZDHHC2,51.238777,3.044675,0.0,0.0
ASPS,CXCL12,51.23679,2.3556,0.0,0.0
ASPS,FAM81A,51.22726,2.6200137,0.0,0.0
ASPS,DGKZ,51.203938,2.032561,0.0,0.0
ASPS,TNFRSF14,51.197987,2.9416554,0.0,0.0
ASPS,DENND5B,51.137775,1.5779258,0.0,0.0
ASPS,ATP5F1B,51.12685,1.3572012,0.0,0.0
ASPS,COL24A1,51.050827,2.3985775,0.0,0.0
ASPS,CHCHD3,51.03499,1.4162899,0.0,0.0
ASPS,CMPK2,51.01496,4.8416886,0.0,0.0
ASPS,PLCB4,50.990524,1.6365838,0.0,0.0
ASPS,GAS6,50.930004,1.8533149,0.0,0.0
ASPS,NRIR,50.86391,6.2776704,0.0,0.0
ASPS,CCDC85A,50.850098,2.9254558,0.0,0.0
ASPS,NLRC5,50.78143,3.29541,0.0,0.0
ASPS,HNF4G,50.766384,2.7959478,0.0,0.0
ASPS,DLGAP4,50.61906,1.6173071,0.0,0.0
ASPS,ZBTB20,50.5005,1.3916674,0.0,0.0
ASPS,ABLIM2,50.429943,3.218222,0.0,0.0
ASPS,CELF6,50.417484,3.4888763,0.0,0.0
ASPS,SDHA,50.398876,1.5109637,0.0,0.0
ASPS,DEPP1,50.37895,4.2873845,0.0,0.0
ASPS,RND3,50.325146,2.6260173,0.0,0.0
ASPS,RHEB,50.26355,1.6151869,0.0,0.0
ASPS,CATSPERE,50.237476,2.2585115,0.0,0.0
ASPS,PIM1,50.137707,3.6565573,0.0,0.0
ASPS,SNTA1,50.035137,3.3361661,0.0,0.0
ASPS,MGST3,49.984173,1.7018199,0.0,0.0
ASPS,C2,49.90502,3.3743863,0.0,0.0
ASPS,ACBD3,49.90094,1.722527,0.0,0.0
ASPS,FBH1,49.88056,1.6584218,0.0,0.0
ASPS,MAX,49.871086,1.6954741,0.0,0.0
ASPS,PARP8,49.824867,2.0262897,0.0,0.0
ASPS,BTBD9,49.814358,1.4582005,0.0,0.0
ASPS,EPHA5,49.76372,2.1657665,0.0,0.0
ASPS,SKAP2,49.748875,2.064953,0.0,0.0
ASPS,MSANTD3,49.679314,2.8330483,0.0,0.0
ASPS,MPP7,49.632427,2.0757864,0.0,0.0
ASPS,YOD1,49.525864,3.8644927,0.0,0.0
ASPS,CREB3L2,49.480206,1.710044,0.0,0.0
ASPS,COX7A2L,49.459896,1.6517826,0.0,0.0
ASPS,CDR2,49.44979,1.8896687,0.0,0.0
ASPS,RUSC2,49.418716,2.0211778,0.0,0.0
ASPS,LPGAT1,49.29869,1.4852844,0.0,0.0
ASPS,TMCO4,49.28494,2.3424058,0.0,0.0
ASPS,AGPAT3,49.26452,1.420525,0.0,0.0
ASPS,FARP1,49.259155,1.4053626,0.0,0.0
ASPS,CAPN2,49.20232,1.3984858,0.0,0.0
ASPS,KLF6,49.18676,1.7964449,0.0,0.0
ASPS,MPC1,49.17998,2.1780953,0.0,0.0
ASPS,GFRA1,49.10001,2.368316,0.0,0.0
ASPS,PARD3B,49.095264,1.4413332,0.0,0.0
ASPS,CFLAR,49.065445,1.4655478,0.0,0.0
ASPS,LINC01920,49.063637,5.9800806,0.0,0.0
ASPS,CDK5RAP2,49.018326,1.3755184,0.0,0.0
ASPS,TNS2,48.99809,2.0998893,0.0,0.0
ASPS,RIMBP2,48.928493,2.8220506,0.0,0.0
ASPS,VPS13C,48.918613,1.3116778,0.0,0.0
ASPS,LIMS1,48.90824,1.5638268,0.0,0.0
ASPS,ADAMTSL4,48.859886,3.8197289,0.0,0.0
ASPS,CTSF,48.815334,3.2696774,0.0,0.0
ASPS,PARP14,48.79795,2.2546532,0.0,0.0
ASPS,GLRA1,48.754272,7.536826,0.0,0.0
ASPS,MLLT10,48.751762,1.2855166,0.0,0.0
ASPS,LAMA5,48.69495,2.0064847,0.0,0.0
ASPS,EPG5,48.671158,1.6168762,0.0,0.0
ASPS,TMEM138,48.65568,2.633454,0.0,0.0
ASPS,FAM114A1,48.64566,1.7503694,0.0,0.0
ASPS,BICC1,48.638412,1.5463123,0.0,0.0
ASPS,NRIP1,48.598625,1.4623668,0.0,0.0
ASPS,SLC22A15,48.54631,3.2239702,0.0,0.0
ASPS,EBF3,48.539963,1.4809529,0.0,0.0
ASPS,BOC,48.531662,1.6915642,0.0,0.0
ASPS,ADGRB3,48.358635,1.8553758,0.0,0.0
ASPS,MAP3K5,48.352898,1.722246,0.0,0.0
ASPS,CPEB4,48.315845,1.7659818,0.0,0.0
ASPS,MOCS1,48.284035,3.815225,0.0,0.0
ASPS,FOXN3,48.239246,1.3669248,0.0,0.0
ASPS,GAS2L3,48.185295,2.1145337,0.0,0.0
ASPS,M6PR,48.155785,2.0831778,0.0,0.0
ASPS,AOPEP,48.12875,1.3078425,0.0,0.0
ASPS,BICDL1,48.079433,2.3435397,0.0,0.0
ASPS,WDSUB1,48.07222,1.862205,0.0,0.0
ASPS,GSAP,48.003567,3.74339,0.0,0.0
ASPS,FAM13A,47.976612,1.4208997,0.0,0.0
ASPS,ARHGEF28,47.941154,2.2152789,0.0,0.0
ASPS,KLK4,47.876347,5.3077188,0.0,0.0
ASPS,ITGAV,47.851402,1.6082065,0.0,0.0
ASPS,FBN1,47.833374,1.4316478,0.0,0.0
ASPS,UCK2,47.803673,1.740471,0.0,0.0
ASPS,ASPH,47.773582,1.3145318,0.0,0.0
ASPS,ELL2,47.764053,1.9034365,0.0,0.0
ASPS,GOLGA3,47.70644,1.4096234,0.0,0.0
ASPS,LIMA1,47.618984,1.6452416,0.0,0.0
ASPS,PARP15,47.583084,4.796873,0.0,0.0
ASPS,USP9X,47.559982,1.2936016,0.0,0.0
ASPS,RAB1A,47.53745,1.4211771,0.0,0.0
ASPS,DYSF,47.526947,2.455125,0.0,0.0
ASPS,WSB1,47.486225,1.1816463,0.0,0.0
ASPS,PCA3,47.38238,4.4832573,0.0,0.0
ASPS,UGP2,47.363415,1.7459646,0.0,0.0
ASPS,TCP11L2,47.337307,2.0377784,0.0,0.0
ASPS,ZNF44,47.247593,1.7833048,0.0,0.0
ASPS,PSG8,47.239197,8.95433,0.0,0.0
ASPS,DNASE1L3,47.238197,7.5332403,0.0,0.0
ASPS,KEL,47.18568,5.2440286,0.0,0.0
ASPS,RHBDF1,47.15975,3.150306,0.0,0.0
ASPS,ATP1A3,47.101517,2.9062183,0.0,0.0
ASPS,DHX32,47.070633,1.6864341,0.0,0.0
ASPS,PLEKHO2,47.056854,3.8248353,0.0,0.0
ASPS,FRK,47.02543,2.6969807,0.0,0.0
ASPS,RALA,47.01347,1.7008971,0.0,0.0
ASPS,MICALL2,46.98037,3.1081119,0.0,0.0
ASPS,RTN4R,46.979095,3.98981,0.0,0.0
ASPS,MAT1A,46.969704,6.124695,0.0,0.0
ASPS,RAP2A,46.96866,1.8579429,0.0,0.0
ASPS,USP32,46.95719,1.3464248,0.0,0.0
ASPS,AFG3L2,46.951942,1.6326168,0.0,0.0
ASPS,ATF3,46.929092,1.8961161,0.0,0.0
ASPS,CSGALNACT1,46.90723,1.8446909,0.0,0.0
ASPS,SLC38A6,46.887123,1.4141276,0.0,0.0
ASPS,PLXNA2,46.884518,1.5340598,0.0,0.0
ASPS,AKT3,46.865524,1.2842244,0.0,0.0
ASPS,MIR22HG,46.859264,3.3770077,0.0,0.0
ASPS,ATP6V1H,46.857475,1.58486,0.0,0.0
ASPS,RBPMS2,46.76129,4.2823486,0.0,0.0
ASPS,CLIC6,46.73363,4.1967783,0.0,0.0
ASPS,RTN3,46.73238,1.3930426,0.0,0.0
ASPS,CR1L,46.684933,5.6779847,0.0,0.0
ASPS,VAC14,46.628956,2.1334672,0.0,0.0
ASPS,PECR,46.614002,2.2025313,0.0,0.0
ASPS,IL15,46.605377,2.568487,0.0,0.0
ASPS,DECR1,46.58321,1.4375664,0.0,0.0
ASPS,PCNX2,46.569508,1.9344395,0.0,0.0
ASPS,ERICH1,46.568977,1.4234929,0.0,0.0
ASPS,ARL8B,46.478676,1.5511763,0.0,0.0
ASPS,RIN3,46.457172,2.2787652,0.0,0.0
ASPS,DGKI,46.42424,2.8323321,0.0,0.0
ASPS,IDS,46.381687,1.9149953,0.0,0.0
ASPS,PSG4,46.341286,9.054417,0.0,0.0
ASPS,LINC02335,46.338707,6.9269023,0.0,0.0
ASPS,LAMC1,46.33866,1.2901834,0.0,0.0
ASPS,NRG2,46.274143,3.9969573,0.0,0.0
ASPS,SQOR,46.270336,4.5355234,0.0,0.0
ASPS,PER3,46.25403,2.2706947,0.0,0.0
ASPS,CLDN12,46.20187,2.065439,0.0,0.0
ASPS,CYP4V2,46.197052,2.2614257,0.0,0.0
ASPS,ZNF106,46.155792,1.2360948,0.0,0.0
ASPS,LNPEP,46.153778,1.5626972,0.0,0.0
ASPS,HS3ST2,46.07123,3.8974893,0.0,0.0
ASPS,EPOR,46.058517,3.4046817,0.0,0.0
ASPS,GAK,46.03204,1.452318,0.0,0.0
ASPS,SPON2,46.00214,1.6473997,0.0,0.0
ASPS,BACH1,45.982086,1.3418527,0.0,0.0
ASPS,NOD1,45.97684,2.1589086,0.0,0.0
ASPS,PPTC7,45.913948,2.0319932,0.0,0.0
ASPS,NBEA,45.886383,1.2896805,0.0,0.0
ASPS,MAPKAPK2,45.832153,1.7017006,0.0,0.0
ASPS,LAMP2,45.81013,1.5552465,0.0,0.0
ASPS,VDAC3,45.803097,1.3993134,0.0,0.0
ASPS,DCBLD1,45.719116,2.9925683,0.0,0.0
ASPS,GNA13,45.707092,1.4749886,0.0,0.0
ASPS,LVRN,45.64399,5.1922708,0.0,0.0
ASPS,TAOK3,45.593487,1.6780102,0.0,0.0
ASPS,PITPNM2,45.56772,2.217804,0.0,0.0
ASPS,RIPOR1,45.502617,2.2395122,0.0,0.0
ASPS,PLSCR1,45.494328,2.064318,0.0,0.0
ASPS,ATP5F1C,45.491405,1.4084169,0.0,0.0
ASPS,TFPI,45.479855,2.1659713,0.0,0.0
ASPS,TMEM116,45.450127,2.1718574,0.0,0.0
ASPS,PDE8A,45.43606,1.3493221,0.0,0.0
ASPS,LONP1,45.43261,1.852139,0.0,0.0
ASPS,CACNA1E,45.428036,4.701386,0.0,0.0
ASPS,EVC2,45.370804,1.5642499,0.0,0.0
ASPS,LCNL1,45.3646,5.8711677,0.0,0.0
ASPS,MDFIC,45.300102,1.6027037,0.0,0.0
ASPS,NOS1AP,45.225014,1.7890872,0.0,0.0
ASPS,MAP3K8,45.21143,4.0509524,0.0,0.0
ASPS,MAPRE2,45.178413,2.0979512,0.0,0.0
ASPS,YBX3,45.173084,1.280628,0.0,0.0
ASPS,ITGA1,45.157906,2.6156936,0.0,0.0
ASPS,CCDC85C,45.136738,2.8665688,0.0,0.0
ASPS,PLEKHA2,45.136463,1.8672335,0.0,0.0
ASPS,SLC23A2,45.12729,1.534184,0.0,0.0
ASPS,CBLB,45.09457,1.3338804,0.0,0.0
ASPS,ARID1B,45.087143,1.1629778,0.0,0.0
ASPS,FBXL7,45.053455,1.4209522,0.0,0.0
ASPS,PKD2,45.036537,1.4348141,0.0,0.0
ASPS,CRIM1,45.02162,1.6922594,0.0,0.0
ASPS,USF2,44.994614,2.4568002,0.0,0.0
ASPS,ACSL1,44.87441,2.4721105,0.0,0.0
ASPS,DPYD,44.847904,1.3548573,0.0,0.0
ASPS,WWP1,44.83759,1.327991,0.0,0.0
ASPS,ATP6V1C1,44.82003,1.4371463,0.0,0.0
ASPS,SNX27,44.809547,1.576841,0.0,0.0
ASPS,LMF1,44.788506,1.5499414,0.0,0.0
ASPS,WHRN,44.718903,1.800955,0.0,0.0
ASPS,SYT13,44.675777,4.6497493,0.0,0.0
ASPS,SLC27A1,44.675724,2.2839234,0.0,0.0
ASPS,RALGDS,44.604607,1.629992,0.0,0.0
ASPS,DYNC1I1,44.587654,2.1082408,0.0,0.0
ASPS,KLHL2,44.586975,2.1385028,0.0,0.0
ASPS,GCLC,44.57453,2.2413409,0.0,0.0
ASPS,HPS1,44.56961,2.1570432,0.0,0.0
ASPS,KLHL13,44.56839,1.7690107,0.0,0.0
ASPS,SCP2,44.53171,1.6639494,0.0,0.0
ASPS,SESTD1,44.52985,1.4770043,0.0,0.0
ASPS,SLC39A11,44.52338,1.4799491,0.0,0.0
ASPS,MDGA1,44.472176,2.433985,0.0,0.0
ASPS,CNNM2,44.465103,1.8357934,0.0,0.0
ASPS,LINC00954,44.452362,4.384741,0.0,0.0
ASPS,FANK1,44.437153,2.291325,0.0,0.0
ASPS,RAB11FIP4,44.40153,2.9835203,0.0,0.0
ASPS,NOS1,44.371983,1.1900362,0.0,0.0
ASPS,RNF180,44.327698,2.452527,0.0,0.0
ASPS,RRM2B,44.323563,2.0165923,0.0,0.0
ASPS,PCSK6,44.27959,1.9140971,0.0,0.0
ASPS,COQ10A,44.25485,3.1857803,0.0,0.0
ASPS,CIAO2A,44.21437,2.084027,0.0,0.0
ASPS,MICAL3,44.192287,1.3705233,0.0,0.0
ASPS,TTL,44.16017,1.3206638,0.0,0.0
ASPS,DPP7,44.114548,1.851325,0.0,0.0
ASPS,ESRRG,44.009884,1.5409147,0.0,0.0
ASPS,TMEM231,43.96336,3.082349,0.0,0.0
ASPS,YAF2,43.922565,1.5649852,0.0,0.0
ASPS,KIAA0232,43.900883,1.2953335,0.0,0.0
ASPS,FDX1,43.890285,1.8892708,0.0,0.0
ASPS,AEBP2,43.84132,1.2586186,0.0,0.0
ASPS,EFCAB2,43.770283,1.6064563,0.0,0.0
ASPS,PLXNA1,43.716755,2.032995,0.0,0.0
ASPS,TMC7,43.70541,4.4837565,0.0,0.0
ASPS,SYNJ2,43.690765,2.0580099,0.0,0.0
ASPS,NPIPB4,43.688747,2.1246996,0.0,0.0
ASPS,ZBTB37,43.675766,1.626969,0.0,0.0
ASPS,PDP1,43.660038,2.44595,0.0,0.0
ASPS,NDRG2,43.627472,2.4120896,0.0,0.0
ASPS,SLC22A1,43.586735,4.269976,0.0,0.0
ASPS,MYO5C,43.57636,2.6514366,0.0,0.0
ASPS,LZTS2,43.544994,1.6367897,0.0,0.0
ASPS,TP53INP1,43.52685,1.7129991,0.0,0.0
ASPS,DDB1,43.417007,1.3362339,0.0,0.0
ASPS,RAB31,43.394688,1.8746458,0.0,0.0
ASPS,DUOX1,43.388897,3.1378565,0.0,0.0
ASPS,GBA2,43.36828,1.7908578,0.0,0.0
ASPS,EIF2AK3,43.3506,1.7808872,0.0,0.0
ASPS,PLCL2,43.332577,1.633723,0.0,0.0
ASPS,STX8,43.32249,1.3588761,0.0,0.0
ASPS,SERPINE2,43.288616,1.5381925,0.0,0.0
ASPS,XPNPEP1,43.263657,1.7089105,0.0,0.0
ASPS,SCCPDH,43.236027,1.6962962,0.0,0.0
ASPS,ITGA3,43.1614,3.0896552,0.0,0.0
ASPS,SLC66A1L,43.14145,5.2962027,0.0,0.0
ASPS,RNF14,43.137722,1.7752951,0.0,0.0
ASPS,SLC24A2,43.133923,2.28807,0.0,0.0
ASPS,ATXN1,43.12362,1.2212654,0.0,0.0
ASPS,SPEG,43.098915,2.3224843,0.0,0.0
ASPS,SETDB2,43.088585,1.684602,0.0,0.0
ASPS,CLCN7,43.051132,2.1016037,0.0,0.0
ASPS,ABCA5,43.04052,1.1044023,0.0,0.0
ASPS,ADGRD1,42.967365,2.4673815,0.0,0.0
ASPS,NPLOC4,42.942894,1.3359983,0.0,0.0
ASPS,LINC01239,42.90254,3.7670586,0.0,0.0
ASPS,ZNF385D,42.902035,1.7090966,0.0,0.0
ASPS,PRODH,42.895653,5.5090656,0.0,0.0
ASPS,TRDN,42.879036,3.3673246,0.0,0.0
ASPS,CTDSPL,42.85299,1.3487293,0.0,0.0
ASPS,KCP,42.823677,4.8085713,0.0,0.0
ASPS,AMPD3,42.804157,2.119854,0.0,0.0
ASPS,ABCC5,42.80356,1.1841689,0.0,0.0
ASPS,DKK3,42.766132,2.3915246,0.0,0.0
ASPS,PFKM,42.73899,1.852914,0.0,0.0
ASPS,SAE1,42.729946,1.4963356,0.0,0.0
ASPS,RHOBTB3,42.717274,1.1682359,0.0,0.0
ASPS,TTC7A,42.67129,1.7279037,0.0,0.0
ASPS,ARHGEF12,42.65339,1.1049181,0.0,0.0
ASPS,TMEM181,42.6411,1.3098035,0.0,0.0
ASPS,MAN1A1,42.626125,2.5051422,0.0,0.0
ASPS,RELL1,42.613876,1.6349168,0.0,0.0
ASPS,MNT,42.569576,2.2011127,0.0,0.0
ASPS,PRKAB2,42.56899,1.7536952,0.0,0.0
ASPS,CCDC91,42.555386,1.2310965,0.0,0.0
ASPS,LINC00906,42.477962,8.506101,0.0,0.0
ASPS,LARGE1,42.476753,1.3264891,0.0,0.0
ASPS,CLUH,42.467907,2.2275722,0.0,0.0
ASPS,DHDDS,42.46547,2.0044484,0.0,0.0
ASPS,ADCY2,42.463287,1.5942612,0.0,0.0
ASPS,PIGN,42.4021,1.398968,0.0,0.0
ASPS,LARP1,42.350887,1.1259959,0.0,0.0
ASPS,ADIRF,42.337105,3.4483144,0.0,0.0
ASPS,ETFDH,42.325825,1.6698745,0.0,0.0
ASPS,BDH1,42.294456,2.2938542,0.0,0.0
ASPS,LINC01822,42.26669,9.114912,0.0,0.0
ASPS,AKAP6,42.263386,1.5941467,0.0,0.0
ASPS,KCNJ3,42.263016,2.5801923,0.0,0.0
ASPS,GDNF,42.257576,2.8402383,0.0,0.0
ASPS,MAEA,42.179947,1.5124435,0.0,0.0
ASPS,PEPD,42.13865,1.8172184,0.0,0.0
ASPS,SMAD2,42.127254,1.1627219,0.0,0.0
ASPS,RB1CC1,42.124355,1.1236775,0.0,0.0
ASPS,CIITA,42.123634,4.591046,0.0,0.0
ASPS,TOLLIP,42.07678,2.2703183,0.0,0.0
ASPS,HERC1,42.073395,1.1235968,0.0,0.0
ASPS,IRX6,42.06959,4.6296744,0.0,0.0
ASPS,SAMD4A,42.06006,1.2329925,0.0,0.0
ASPS,VIPR2,42.029232,1.52534,0.0,0.0
ASPS,PCLO,42.007507,2.2824192,0.0,0.0
ASPS,SMG6,41.969296,1.171903,0.0,0.0
ASPS,PLOD2,41.898846,1.5872821,0.0,0.0
ASPS,ZFAND5,41.883133,1.0538778,0.0,0.0
ASPS,PDCD4,41.840282,1.2828915,0.0,0.0
ASPS,SORBS2,41.828407,2.6619473,0.0,0.0
ASPS,THRB,41.785667,2.1838777,0.0,0.0
ASPS,FBXL17,41.782116,1.171706,0.0,0.0
ASPS,SNX19,41.77578,1.3794335,0.0,0.0
ASPS,CS,41.761612,1.4407734,0.0,0.0
ASPS,EPM2A,41.74872,1.7464707,0.0,0.0
ASPS,MID1,41.734035,1.23031,0.0,0.0
ASPS,CYTOR,41.65537,2.348702,0.0,0.0
ASPS,HIVEP3,41.649853,1.5247941,0.0,0.0
ASPS,DHRSX,41.64464,1.2682225,0.0,0.0
ASPS,FBXO25,41.590687,2.017352,0.0,0.0
ASPS,ZNF827,41.576416,1.2558558,0.0,0.0
ASPS,PLEKHB2,41.572018,1.6999962,0.0,0.0
ASPS,CTIF,41.537598,1.2150795,0.0,0.0
ASPS,COBLL1,41.5314,1.5098526,0.0,0.0
ASPS,NUTM2A-AS1,41.45936,1.1918118,0.0,0.0
ASPS,SNX8,41.443222,1.6368465,0.0,0.0
ASPS,BTBD7,41.437645,1.2684882,0.0,0.0
ASPS,SHB,41.414417,1.7628689,0.0,0.0
ASPS,TLCD5,41.41218,2.3218307,0.0,0.0
ASPS,ENO3,41.304977,1.6685479,0.0,0.0
ASPS,PPM1K,41.300667,2.0291538,0.0,0.0
ASPS,GABARAPL1,41.275566,2.1057515,0.0,0.0
ASPS,IQGAP1,41.26356,1.1894964,0.0,0.0
ASPS,TPST1,41.248215,1.2411265,0.0,0.0
ASPS,EPB41L1,41.235634,2.5577846,0.0,0.0
ASPS,MTMR10,41.23125,1.5600868,0.0,0.0
ASPS,ZZEF1,41.229004,1.2031041,0.0,0.0
ASPS,HLA-F,41.21237,3.5698872,0.0,0.0
ASPS,ZNF586,41.210613,1.5585663,0.0,0.0
ASPS,ZNF365,41.195396,4.9875593,0.0,0.0
ASPS,SULF2,41.14488,1.0633714,0.0,0.0
ASPS,ATAD1,41.12721,1.3450537,0.0,0.0
ASPS,DTNBP1,41.118282,1.6659955,0.0,0.0
ASPS,ANKRD10,41.06334,1.0167309,0.0,0.0
ASPS,MYO5A,41.02436,1.4119457,0.0,0.0
ASPS,GCNT1,41.011936,2.1326833,0.0,0.0
ASPS,TOM1L2,40.97525,1.2477268,0.0,0.0
ASPS,DRAM1,40.942677,3.2906425,0.0,0.0
ASPS,NT5C2,40.89929,1.2075593,0.0,0.0
ASPS,DBF4,40.884155,2.0276856,0.0,0.0
ASPS,SERPINB6,40.81777,1.598321,0.0,0.0
ASPS,DGLUCY,40.795937,1.2256589,0.0,0.0
ASPS,ZNF852,40.778152,1.9717971,0.0,0.0
ASPS,KLRD1,40.7531,2.5708728,0.0,0.0
ASPS,TNFRSF10B,40.74428,1.4832603,0.0,0.0
ASPS,TPP1,40.736732,1.9613342,0.0,0.0
ASPS,RPS6KA2,40.729607,1.5306962,0.0,0.0
ASPS,PI4K2A,40.726486,2.0879502,0.0,0.0
ASPS,SUCLG2,40.697235,1.2606646,0.0,0.0
ASPS,RIN2,40.69694,1.1695184,0.0,0.0
ASPS,SPNS1,40.677345,2.565528,0.0,0.0
ASPS,DERA,40.61741,1.5647358,0.0,0.0
ASPS,HPS3,40.59794,2.0502234,0.0,0.0
ASPS,BEND7,40.580036,2.4829886,0.0,0.0
ASPS,KLF7,40.578106,1.2179669,0.0,0.0
ASPS,SREBF1,40.572227,1.5028721,0.0,0.0
ASPS,ATP6V1D,40.54894,1.9287531,0.0,0.0
ASPS,ADAM22,40.540245,1.7794423,0.0,0.0
ASPS,TRPS1,40.528156,0.9511302,0.0,0.0
ASPS,TRPC1,40.461258,1.5761117,0.0,0.0
ASPS,FSTL1,40.4537,1.1330757,0.0,0.0
ASPS,NFE2L1,40.430565,1.7075294,0.0,0.0
ASPS,AUH,40.42791,1.1930541,0.0,0.0
ASPS,ZFYVE26,40.407654,1.4933798,0.0,0.0
ASPS,PARP12,40.362484,1.9666762,0.0,0.0
ASPS,STXBP5,40.340572,1.2176334,0.0,0.0
ASPS,PAX8-AS1,40.32159,1.5916167,0.0,0.0
ASPS,NBEAL2,40.28456,2.9817524,0.0,0.0
ASPS,TDRP,40.283844,1.7196163,0.0,0.0
ASPS,MCOLN3,40.281162,3.3378725,0.0,0.0
ASPS,LINC02207,40.260788,5.6111927,0.0,0.0
ASPS,ABCC9,40.253876,2.3228285,0.0,0.0
ASPS,ULK4,40.226517,1.6798263,0.0,0.0
ASPS,N4BP2L2,40.183994,0.99261403,0.0,0.0
ASPS,DDX60,40.17582,2.2058704,0.0,0.0
ASPS,PRKAA2,40.149544,2.662451,0.0,0.0
ASPS,EXOC2,40.141785,1.2489794,0.0,0.0
ASPS,FIG4,40.113052,1.8270873,0.0,0.0
ASPS,HAGHL,40.100582,3.9336636,0.0,0.0
ASPS,VTI1A,40.0845,1.158557,0.0,0.0
ASPS,VPS18,40.060658,3.4469397,0.0,0.0
ASPS,SNX3,40.05103,1.3541042,0.0,0.0
ASPS,PCSK1,40.036472,4.575168,0.0,0.0
ASPS,CYB5R1,40.02008,1.9026368,0.0,0.0
ASPS,ZNF385B,39.949097,2.5196638,0.0,0.0
ASPS,C1orf21,39.937775,1.2996436,0.0,0.0
ASPS,SLC6A8,39.910282,2.4836125,0.0,0.0
ASPS,LAMA2,39.88942,1.344782,0.0,0.0
ASPS,OIP5-AS1,39.806656,1.1201332,0.0,0.0
ASPS,EPAS1,39.77582,1.6229157,0.0,0.0
ASPS,NRSN2-AS1,39.764336,2.1760366,0.0,0.0
ASPS,ASAP2,39.722923,1.130044,0.0,0.0
ASPS,WDFY1,39.716198,1.3677833,0.0,0.0
ASPS,ILRUN,39.688038,1.3006127,0.0,0.0
ASPS,SMIM12,39.6833,2.797551,0.0,0.0
ASPS,SLC38A8,39.667393,7.5430984,0.0,0.0
ASPS,LINC02256,39.635174,1.5295871,0.0,0.0
ASPS,KLC1,39.6242,1.083943,0.0,0.0
ASPS,CLMP,39.592472,1.4016702,0.0,0.0
ASPS,LCORL,39.578243,1.216836,0.0,0.0
ASPS,ABCA8,39.53833,2.157892,0.0,0.0
ASPS,KCNK1,39.52065,3.35456,0.0,0.0
ASPS,DES,39.4883,1.4741578,0.0,0.0
ASPS,ZNF655,39.46872,1.1261885,0.0,0.0
ASPS,FAM20A,39.437313,2.578994,0.0,0.0
ASPS,COX6A1,39.39818,1.525036,0.0,0.0
ASPS,ISCU,39.3892,1.7692031,0.0,0.0
ASPS,ERC1,39.376774,1.0466701,0.0,0.0
ASPS,PYGL,39.3741,2.5870063,0.0,0.0
ASPS,ATP6V1A,39.358593,1.5532358,0.0,0.0
ASPS,AHI1,39.335487,1.1912273,0.0,0.0
ASPS,GRB10,39.309937,1.7018572,0.0,0.0
ASPS,NR1D1,39.241287,4.0949826,0.0,0.0
ASPS,PIK3CB,39.237793,1.4546971,0.0,0.0
ASPS,NUFIP2,39.217857,1.0818033,0.0,0.0
ASPS,CADPS2,39.214153,0.687402,0.0,0.0
ASPS,ERVH-1,39.20065,6.6992517,0.0,0.0
ASPS,RAB2A,39.191692,1.0617979,0.0,0.0
ASPS,CPM,39.18577,4.7806363,0.0,0.0
ASPS,SRGAP1,39.158012,1.1669428,0.0,0.0
ASPS,TGM5,39.137905,11.442313,0.0,0.0
ASPS,FZD6,39.133205,2.3950918,0.0,0.0
ASPS,ARHGEF10,39.108494,1.277177,0.0,0.0
ASPS,CRYL1,39.106632,2.3138673,0.0,0.0
ASPS,TMEM38B,39.099937,2.0021267,0.0,0.0
ASPS,ADCY7,39.057785,2.3030026,0.0,0.0
ASPS,NR3C1,38.994495,1.0545388,0.0,0.0
ASPS,AP5M1,38.97758,1.6889367,0.0,0.0
ASPS,MIR3936HG,38.949677,1.402741,0.0,0.0
ASPS,SLC22A23,38.929386,1.5013884,0.0,0.0
ASPS,DYM,38.878464,1.0913553,0.0,0.0
ASPS,SPG11,38.831562,1.0714723,0.0,0.0
ASPS,ARFGAP3,38.812702,1.4760098,0.0,0.0
ASPS,HEXB,38.806423,2.1509168,0.0,0.0
ASPS,GIT2,38.78363,1.2368174,0.0,0.0
ASPS,L3HYPDH,38.680355,1.4303747,0.0,0.0
ASPS,EFR3A,38.675232,1.1547827,0.0,0.0
ASPS,RBM19,38.67282,1.2363362,0.0,0.0
ASPS,CCDC175,38.671608,4.7648945,0.0,0.0
ASPS,AP1S2,38.66492,1.5014553,0.0,0.0
ASPS,CSNK1D,38.65718,1.1117682,0.0,0.0
ASPS,GALNT11,38.62953,1.076968,0.0,0.0
ASPS,TRAF3IP2-AS1,38.626797,1.1396757,0.0,0.0
ASPS,TBCD,38.603477,1.11644,0.0,0.0
ASPS,CYP27A1,38.58504,2.1719134,0.0,0.0
ASPS,RNF10,38.570484,1.1986716,0.0,0.0
ASPS,PRKCH,38.543324,2.065954,0.0,0.0
ASPS,RBMS1,38.52873,1.0503811,0.0,0.0
ASPS,FLNC,38.50695,1.2285444,0.0,0.0
ASPS,SHTN1,38.49167,0.8669192,0.0,0.0
ASPS,CDKN2B-AS1,38.47967,1.8832223,0.0,0.0
ASPS,CBFA2T2,38.45477,1.0157334,0.0,0.0
ASPS,EDA,38.452396,1.3018043,0.0,0.0
ASPS,TDRD7,38.381546,2.3479018,0.0,0.0
ASPS,FAM210A,38.36916,1.6877996,0.0,0.0
ASPS,RIPK1,38.363163,1.4665732,0.0,0.0
ASPS,ARMCX4,38.339916,1.2395144,0.0,0.0
ASPS,CEP85L,38.318176,1.1051041,0.0,0.0
ASPS,PKD1L1,38.286045,4.6034474,0.0,0.0
ASPS,TOGARAM2,38.253613,5.126881,0.0,0.0
ASPS,SFXN3,38.241173,2.4556901,0.0,0.0
ASPS,HOOK2,38.240963,1.5059339,0.0,0.0
ASPS,CPZ,38.224556,7.9788785,0.0,0.0
ASPS,SPAG16,38.202045,1.3391992,0.0,0.0
ASPS,PRPSAP1,38.16045,1.2816654,0.0,0.0
ASPS,PACS2,38.15594,1.0889175,0.0,0.0
ASPS,WBP2,38.128246,1.8835628,0.0,0.0
ASPS,EPHX1,38.1271,2.0503826,0.0,0.0
ASPS,GMDS-DT,38.083492,1.1096212,0.0,0.0
ASPS,LACTB2,38.079853,2.5467818,0.0,0.0
ASPS,NUP210,38.067345,2.0633874,0.0,0.0
ASPS,IGFBP7,38.051926,1.7226837,0.0,0.0
ASPS,SAT1,37.986908,1.5381707,0.0,0.0
ASPS,ANKRD29,37.984734,1.8171405,0.0,0.0
ASPS,STUM,37.984394,2.0402393,0.0,0.0
ASPS,RHOA,37.963467,1.0298524,0.0,0.0
ASPS,PPARA,37.944912,1.7248923,0.0,0.0
ASPS,COX10,37.884438,1.2413875,0.0,0.0
ASPS,PCYT2,37.871998,3.375137,0.0,0.0
ASPS,MBNL2,37.859356,1.1080016,0.0,0.0
ASPS,CD59,37.83587,1.4722426,0.0,0.0
ASPS,ARFGEF3,37.79456,3.0247822,0.0,0.0
ASPS,C2orf88,37.75532,2.315045,0.0,0.0
ASPS,TTC7B,37.749817,1.1201285,0.0,0.0
ASPS,IL1R1,37.727085,2.1239686,0.0,0.0
ASPS,UST,37.714127,1.1498725,0.0,0.0
ASPS,TMEM70,37.712536,2.0029075,0.0,0.0
ASPS,G0S2,37.7083,1.5991488,0.0,0.0
ASPS,TRAPPC9,37.70054,1.0277973,0.0,0.0
ASPS,CLCF1,37.669003,3.361663,1.5985979589479e-310,3.00806413596339e-309
ASPS,PLA1A,37.632324,6.279406,6.36695731234754e-310,1.196063224660946e-308
ASPS,PPP1R12B,37.55551,1.0041529,1.145322761858019e-308,2.147957396301227e-307
ASPS,RAB3IL1,37.512966,3.6092951,5.661783421544079e-308,1.0609361856940008e-306
ASPS,MUSK,37.49501,2.381914,1.1107832991907367e-307,2.0797153201570324e-306
ASPS,TEAD3,37.383804,2.0616992,7.162633500617675e-306,1.339942368507072e-304
ASPS,IBTK,37.38323,1.100982,7.31867435933297e-306,1.3679963991427618e-304
ASPS,ATP5F1A,37.34989,0.9258161,2.545770628027975e-305,4.754569957159301e-304
ASPS,PYGO1,37.326225,1.551008,6.163758767861903e-305,1.1502105395583095e-303
ASPS,RPS6KC1,37.278347,1.0024388,3.681553896953092e-304,6.864405174062082e-303
ASPS,GOLGA8B,37.254173,1.2834073,9.0695102859323e-304,1.689646763120086e-302
ASPS,UVRAG,37.25304,1.0680517,9.461066486320964e-304,1.7611356598399777e-302
ASPS,CDRT4,37.247986,1.5880169,1.142202690530806e-303,2.1244026074707264e-302
ASPS,FMN1,37.22726,1.1392304,2.472536785359642e-303,4.5949166271278897e-302
ASPS,ASAP3,37.217594,1.6336346,3.5443556496061197e-303,6.581330354322254e-302
ASPS,GFPT1,37.16246,1.2645056,2.7583816140398904e-302,5.117673390269393e-301
ASPS,PLEKHA5,37.141506,0.98362076,6.011631244448768e-302,1.1144296635611164e-300
ASPS,DAAM1,37.11127,1.1902845,1.8485922924815533e-301,3.424079797719947e-300
ASPS,SNX30,37.097954,1.5814505,3.0312636651760273e-301,5.6100813145383634e-300
ASPS,LGALS3,37.08949,2.0694845,4.150470967672031e-301,7.675131399133859e-300
ASPS,FAM120B,37.081306,0.9807757,5.6226447282649655e-301,1.0388967127225208e-299
ASPS,SLC9A9,37.065285,1.8291787,1.0187962248472136e-300,1.8808867137150568e-299
ASPS,PSG9,37.05019,9.32332,1.7833310530793134e-300,3.289661094225406e-299
ASPS,ANKH,37.0374,1.5575078,2.865022695414476e-300,5.280699079467877e-299
ASPS,DOP1B,37.013435,1.5495238,6.962577564536273e-300,1.282265205318239e-298
ASPS,GARNL3,36.96517,1.2794917,4.1558697988603765e-299,7.641164201254312e-298
ASPS,WASHC3,36.93389,1.4095871,1.3212759411807292e-298,2.4273726576548824e-297
ASPS,VPS26C,36.929726,1.5014608,1.541023038280355e-298,2.8287702672511742e-297
ASPS,ST3GAL1,36.923374,1.469172,1.9489148266773924e-298,3.574598873217173e-297
ASPS,NDUFS1,36.908234,1.099825,3.409498815857904e-298,6.243349947183249e-297
ASPS,KLHL24,36.90504,1.1011326,3.835993108334263e-298,7.018619910818096e-297
ASPS,MRPS25,36.88815,1.075724,7.1570535409379864e-298,1.3084442724517416e-296
ASPS,CDC14B,36.873413,1.0957729,1.2330885192477257e-297,2.2524884030576351e-296
ASPS,HLA-E,36.844307,1.3867309,3.607469825507043e-297,6.584437017277859e-296
ASPS,ZRANB1,36.78513,1.4933114,3.1922998576187926e-296,5.817223343782261e-295
ASPS,AKAP1,36.77647,1.8646729,4.390122878856737e-296,7.987042472810902e-295
ASPS,MAT2A,36.68175,0.9139013,1.4273684452067999e-294,2.5947436881566263e-293
ASPS,FAM107B,36.608215,1.7296832,2.1167656346148212e-293,3.8448596131562995e-292
ASPS,ATR,36.60521,1.1495655,2.3632880743603122e-293,4.289177267216034e-292
ASPS,TTBK2,36.58697,1.0760427,4.6087111144815726e-293,8.35769892275647e-292
ASPS,ETFA,36.585495,1.1889815,4.865082204077373e-293,8.81551328524648e-292
ASPS,SGPL1,36.57714,1.3165983,6.604932110188152e-293,1.1948874368149867e-291
ASPS,EIF4E3,36.57126,2.623312,8.19153048359722e-293,1.4807260524767507e-291
ASPS,RCAN2,36.560112,2.8865614,1.2317204846114985e-292,2.224708628104476e-291
ASPS,SFXN5,36.54939,1.429633,1.8234308690509366e-292,3.2908028635117344e-291
ASPS,RUBCNL,36.544556,2.6376083,2.175982414914783e-292,3.923917007023813e-291
ASPS,CTBP2,36.51416,0.9597434,6.610821534974755e-292,1.190212309156855e-290
ASPS,DNAJC13,36.49078,1.0916684,1.5529176016625846e-291,2.793637939681572e-290
ASPS,MFSD1,36.489155,1.8469042,1.647981487856132e-291,2.962286212795707e-290
ASPS,AVL9,36.46836,1.0071341,3.5205079238933635e-291,6.323146913585008e-290
ASPS,SLC25A51,36.46291,1.6933982,4.2954836535021005e-291,7.708920225045037e-290
ASPS,STK39,36.4217,1.0129569,1.9306964467915487e-290,3.4621771741070757e-289
ASPS,ARHGAP1,36.400536,1.8555162,4.17502045659944e-290,7.474847683036627e-289
ASPS,DENND4C,36.39771,1.0425644,4.6275691263975316e-290,8.2784930993304e-289
ASPS,ST14,36.383427,5.3235626,7.784653139685276e-290,1.391529935731669e-288
ASPS,CCDC144A,36.375652,1.0423788,1.0332024811224118e-289,1.8454144315603078e-288
ASPS,UNC5C,36.374977,2.1119494,1.0587883452900074e-289,1.889613934238828e-288
ASPS,PRKN,36.348457,1.0711087,2.779517070510126e-289,4.956658611080062e-288
ASPS,PELI2,36.348278,1.1676102,2.797510796202551e-289,4.9847965533284566e-288
ASPS,USP54,36.326344,1.230276,6.21120079474066e-289,1.1058787490952416e-287
ASPS,TBC1D7,36.293316,1.5467651,2.062430204203193e-288,3.669169307952005e-287
ASPS,ERC2,36.179752,1.964171,1.2675516488477318e-286,2.2532582825685786e-285
ASPS,CFH,36.14889,1.3303471,3.8725883709329573e-286,6.878658349474839e-285
ASPS,MAP1B,36.13141,1.0001498,7.288736695015111e-286,1.293635799063999e-284
ASPS,BCL2,36.10451,1.0714166,1.9269410172723317e-285,3.417321323381704e-284
ASPS,BBX,36.097942,0.95530134,2.4430921281461674e-285,4.329274672750354e-284
ASPS,RSAD2,36.06201,2.9468045,8.940675157638029e-285,1.5830833550168674e-283
ASPS,NAGK,36.033173,1.5181777,2.5306140037803258e-284,4.477316678858194e-283
ASPS,ACSS2,36.014046,1.7613493,5.04297776970494e-284,8.915335012349542e-283
ASPS,WASHC4,35.989162,1.0121372,1.2360973857878821e-283,2.1835456567626603e-282
ASPS,STON2,35.988495,1.5305665,1.2661324263886105e-283,2.2348478632059357e-282
ASPS,ADGRG3,35.897385,9.499639,3.355728920057613e-282,5.913913809388925e-281
ASPS,SFXN4,35.860764,1.5033543,1.2497837569739307e-281,2.1990917475135507e-280
ASPS,CIR1,35.776546,1.4804654,2.558339829065152e-280,4.494569699696428e-279
ASPS,TMEM176B,35.7535,1.749459,5.8368805493735075e-280,1.0246411604028923e-278
ASPS,ACAT1,35.752907,1.6573001,5.962032849747335e-280,1.0457953958188915e-278
ASPS,PCBD2,35.73845,1.3283123,1.0000555373889154e-279,1.7528231985153847e-278
ASPS,SSH1,35.717182,1.0108598,2.1393728179301877e-279,3.746815974125982e-278
ASPS,CYP11A1,35.71293,4.542461,2.490456277604246e-279,4.358298485807431e-278
ASPS,HSPB8,35.711304,2.5279443,2.6395249426047302e-279,4.615579551928473e-278
ASPS,LINC02615,35.703564,1.2586999,3.4804758988373007e-279,6.081375008022783e-278
ASPS,NMNAT3,35.696102,2.244804,4.544071139316367e-279,7.933616834004254e-278
ASPS,DNAJC1,35.684666,1.0689552,6.836252356839746e-279,1.1926345681447945e-277
ASPS,LYPD5,35.665512,4.6882253,1.354670980869912e-278,2.361492674243019e-277
ASPS,VIPR1,35.651665,7.2334313,2.2203576385453878e-278,3.867581165283587e-277
ASPS,TRPV5,35.64565,6.1377306,2.7519238172563443e-278,4.786093161310203e-277
ASPS,CRACR2B,35.635582,2.7757406,3.940979793847653e-278,6.848783803902813e-277
ASPS,SNX9,35.524822,1.063574,2.0342772574625873e-276,3.5297925735694316e-275
ASPS,NDUFS4,35.518898,1.0455865,2.5113114132257178e-276,4.3541651274764854e-275
ASPS,ENTPD4,35.465652,1.1807595,1.6645426463451508e-275,2.8837977102384617e-274
ASPS,EEA1,35.465233,1.0561422,1.689425051740183e-275,2.924654676108679e-274
ASPS,PINX1,35.415062,1.5511098,1.0012493634706934e-274,1.731984390846115e-273
ASPS,ATP6V0E1,35.402824,1.3505785,1.5448525048249726e-274,2.670269248931337e-273
ASPS,MINDY2,35.348618,1.1735078,1.0529035246354403e-273,1.818541352411403e-272
ASPS,MAPK8IP3,35.32683,1.1444418,2.2751068447911285e-273,3.92647849248653e-272
ASPS,KCTD7,35.264175,1.7781682,2.080614753258459e-272,3.588063986366408e-271
ASPS,PDCD6IP,35.244934,0.93776935,4.102527372983594e-272,7.069477682158942e-271
ASPS,MYF6,35.199368,5.005709,2.0446169233885507e-271,3.5205894308232082e-270
ASPS,PDCD6,35.193108,1.0205772,2.5489204256914286e-271,4.385585181971376e-270
ASPS,PAWR,35.18969,1.5931294,2.875063278144772e-271,4.942956384617883e-270
ASPS,SLC4A2,35.18766,1.7130735,3.0879574143379023e-271,5.304922260280495e-270
ASPS,MIR99AHG,35.18732,0.89087206,3.125423522932475e-271,5.365191181052277e-270
ASPS,NCOA2,35.176506,0.89999145,4.573810286299554e-271,7.845548818077094e-270
ASPS,CMTM7,35.164906,2.4491112,6.880239102962283e-271,1.1783849392097883e-269
ASPS,CMYA5,35.16456,1.626149,6.964548029387077e-271,1.191917516360123e-269
ASPS,CHMP4B,35.108215,1.5540631,5.0508699690856784e-270,8.637524973728966e-269
ASPS,BAG3,35.1041,2.404772,5.836397892041666e-270,9.973282806408328e-269
ASPS,SLC7A5,35.09877,1.3030881,7.038582392646421e-270,1.2018459540706199e-268
ASPS,EXOC6B,35.05614,0.9220053,3.143440500218037e-269,5.363391088506969e-268
ASPS,ARHGAP12,35.040565,1.0570813,5.4287397447560355e-269,9.255589996646559e-268
ASPS,NQO2,35.025543,1.6121745,9.192196053374346e-269,1.5660134154518519e-267
ASPS,VPS13A,35.007755,1.0341808,1.7145720089516667e-268,2.918792969853045e-267
ASPS,MECP2,34.99357,1.112825,2.818433086352733e-268,4.7943187156740935e-267
ASPS,MDH1,34.987617,1.1979523,3.471093037889293e-268,5.900071662968168e-267
ASPS,ANKRD12,34.979496,0.9820097,4.612977953020123e-268,7.829190711366355e-267
ASPS,SSPN,34.936184,2.211732,2.099383667937158e-267,3.560409151991389e-266
ASPS,SYTL2,34.924164,1.5395058,3.1955503986762155e-267,5.4153510332988124e-266
ASPS,ARIH2,34.92109,1.008397,3.558491539026878e-267,6.025872993664401e-266
ASPS,ZBTB38,34.895668,1.1977503,8.648270539271739e-267,1.4633784096715076e-265
ASPS,CD46,34.87151,0.9406961,2.010124769687158e-266,3.3987872232764456e-265
ASPS,GPRC5A,34.870426,3.5168476,2.0876628031415077e-266,3.5272410949474196e-265
ASPS,PKIB,34.831917,2.2927308,7.998989973493203e-266,1.3504671369352177e-264
ASPS,LINC01505,34.745995,1.9064287,1.5931630806190658e-264,2.687716276561625e-263
ASPS,STK33,34.731224,1.6697855,2.6623266035327796e-264,4.484705105726438e-263
ASPS,RABGAP1L,34.70938,0.92316383,5.687793397018514e-264,9.573955901264148e-263
ASPS,ATP9A,34.705685,1.2796453,6.466698238220287e-264,1.0876909106961701e-262
ASPS,FEM1B,34.70481,1.3067842,6.665660132518891e-264,1.1203187549091683e-262
ASPS,CNPPD1,34.69787,2.1955888,8.484127927279716e-264,1.4248902910703732e-262
ASPS,BTBD6,34.629147,2.7350593,9.203916069108174e-263,1.5423241335463846e-261
ASPS,PIP4P2,34.600697,1.599095,2.4661150979298656e-262,4.129458354085686e-261
ASPS,TMEM72-AS1,34.59773,2.1474016,2.7331044502086094e-262,4.5731238402932905e-261
ASPS,C1RL,34.597202,1.5190337,2.783443526902393e-262,4.653892761733905e-261
ASPS,UNK,34.597054,1.033376,2.7980000765378853e-262,4.674758108573505e-261
ASPS,RC3H1,34.596134,0.9076478,2.888281774009e-262,4.822016418699744e-261
ASPS,STARD9,34.57971,1.119137,5.100020086095313e-262,8.501922373153705e-261
ASPS,DUSP16,34.575054,1.583521,5.991938282149446e-262,9.981389418191952e-261
ASPS,SERPINB9,34.539745,2.4572794,2.0319564177116402e-261,3.379835859615703e-260
ASPS,PHACTR1,34.50598,1.5388067,6.524451517725406e-261,1.084437085719426e-259
ASPS,TOB1,34.502277,1.984678,7.415034085548583e-261,1.2315523401865008e-259
ASPS,UMAD1,34.50132,1.0250171,7.66455032809485e-261,1.272055347594208e-259
ASPS,HOXA3,34.489487,1.9475942,1.1530696855898968e-260,1.912294272232913e-259
ASPS,URB1,34.48671,1.0875366,1.2691307316596106e-260,2.103224382621468e-259
ASPS,SERPINF1,34.461315,1.5414252,3.047973619225466e-260,5.047435342212591e-259
ASPS,ETNPPL,34.44504,6.7670693,5.34266460068809e-260,8.840931385182755e-259
ASPS,FUCA2,34.44285,2.3286104,5.761679942392334e-260,9.527303975278434e-259
ASPS,CENPP,34.41075,1.0081408,1.7412052508022825e-259,2.877079601270585e-258
ASPS,PANK1,34.392868,1.7036117,3.2233767992175005e-259,5.322237334291259e-258
ASPS,USP25,34.37587,0.95529175,5.785088694546766e-259,9.544972219265027e-258
ASPS,MAN1C1,34.36983,1.1709125,7.12166634900829e-259,1.174161913439059e-257
ASPS,RPTOR,34.36444,0.90097344,8.57234728500145e-259,1.4123036284696752e-257
ASPS,SIRT5,34.360493,1.5710152,9.818478122259806e-259,1.6164217274429915e-257
ASPS,CRADD,34.35569,1.1036056,1.15817068083761e-258,1.9053092962171354e-257
ASPS,XYLB,34.353874,1.5336424,1.2327590529546778e-258,2.0265334175854657e-257
ASPS,SPTLC1,34.3473,1.1364119,1.5453846394602583e-258,2.538604475259351e-257
ASPS,AXIN1,34.345997,1.5200763,1.6162311436818047e-258,2.6530475483996365e-257
ASPS,ZNF717,34.342274,1.1427704,1.836966477240674e-258,3.0131873593514115e-257
ASPS,TBC1D5,34.32179,0.94286793,3.7134255865084957e-258,6.086718341177982e-257
ASPS,ABCC6,34.314972,4.4668064,4.693220324526006e-258,7.681521702069655e-257
ASPS,DMXL2,34.30748,1.0654799,6.070318936508986e-258,9.928236022248163e-257
ASPS,CCDC12,34.289314,1.31965,1.132376754399799e-257,1.8506999896708405e-256
ASPS,SRPK2,34.275276,0.89803904,1.833216130494047e-257,2.991771502303736e-256
ASPS,GYPC,34.220695,1.340699,1.1903801405792252e-256,1.9412684828793814e-255
ASPS,EOGT,34.184315,1.9818947,4.1359441389011284e-256,6.740001654306292e-255
ASPS,ITFG1,34.17796,0.99584717,5.140143569944704e-256,8.370400220087233e-255
ASPS,CD22,34.17483,5.9397063,5.721098491946145e-256,9.309712332700506e-255
ASPS,MIR646HG,34.173973,2.1705825,5.891494883749465e-256,9.580064476790586e-255
ASPS,WSB2,34.172607,1.6306409,6.172782943242601e-256,1.0030215172395287e-254
ASPS,STOM,34.14414,1.9181187,1.6337091538139533e-255,2.6508020552691436e-254
ASPS,DENND2A,34.142517,1.5662088,1.726854762420523e-255,2.7999183305672816e-254
ASPS,KANK1,34.138493,0.9697188,1.981444481538686e-255,3.2103965483821546e-254
ASPS,FTH1,34.132793,0.7516987,2.407253600927594e-255,3.8974994452428416e-254
ASPS,ARMCX5-GPRASP2,34.110043,1.1183463,5.235641538541141e-255,8.4707485855405e-254
ASPS,NFIB,34.09936,0.9272366,7.539009214629072e-255,1.2179856595493703e-253
ASPS,FYCO1,34.01908,1.325356,1.1635974694393472e-253,1.8771871720238356e-252
ASPS,PEX5,34.005714,1.8991518,1.834134308049105e-253,2.952588884309378e-252
ASPS,ARAP1,34.000393,1.5443755,2.1982433571092127e-253,3.536202055163891e-252
ASPS,NMT2,33.998882,1.7965337,2.3143100488520034e-253,3.7202534035295955e-252
ASPS,YTHDF3,33.99342,0.895624,2.787026658296627e-253,4.47694753354501e-252
ASPS,NEURL1B,33.986095,2.2976081,3.5753880254078316e-253,5.739237340356865e-252
ASPS,TIGD2,33.809284,2.928587,1.4405653749498503e-250,2.3041879007282435e-249
ASPS,NEK1,33.76658,1.0160644,6.10579126183979e-250,9.759292070149466e-249
ASPS,DCUN1D2,33.764874,1.2922243,6.468027177266823e-250,1.033094049853725e-248
ASPS,FLYWCH1,33.75989,1.815429,7.653828762137133e-250,1.2216270658999728e-248
ASPS,GPI,33.74934,0.8303602,1.093166770703616e-249,1.7435661356970147e-248
ASPS,TMEM63A,33.74026,1.5235488,1.4854597178894057e-249,2.3675829285482346e-248
ASPS,LINC01483,33.734238,4.728637,1.8205362782195197e-249,2.899587327765767e-248
ASPS,ZNF429,33.72231,1.6654117,2.7231871073084346e-249,4.3311184346273024e-248
ASPS,PDPR,33.698048,1.2162285,6.174183951760403e-249,9.812853801862138e-248
ASPS,ATP6V0D1,33.67363,1.9332931,1.4065065130294647e-248,2.2315043638951152e-247
ASPS,UCKL1,33.67362,1.5230317,1.407022747108273e-248,2.2315043638951152e-247
ASPS,TBC1D22B,33.669598,1.3705779,1.6111317301249336e-248,2.55341687228603e-247
ASPS,ZBTB47,33.66911,2.0897336,1.637762114861667e-248,2.593795664670079e-247
ASPS,ZDHHC23,33.668133,3.6697261,1.692643403911183e-248,2.6788283969775794e-247
ASPS,PRL,33.6515,5.2435336,2.964140053935656e-248,4.687840612355723e-247
ASPS,SUGCT,33.645184,1.1614958,3.667205538581498e-248,5.795678416135998e-247
ASPS,GM2A,33.62604,2.8124168,6.985513755838441e-248,1.1024473146924551e-246
ASPS,EIF4EBP2,33.602264,0.99965286,1.554544634611037e-247,2.4499318628796493e-246
ASPS,CNTNAP3B,33.584923,1.6521207,2.785141757891985e-247,4.3862571911377973e-246
ASPS,VPS37A,33.560997,1.117241,6.223130817989725e-247,9.793815318801313e-246
ASPS,ZNF407,33.555508,0.91892993,7.482674907063186e-247,1.1767826609605662e-245
ASPS,WDR37,33.546204,1.2019632,1.0227134946338349e-246,1.607274245582015e-245
ASPS,PDE5A,33.522396,1.3066372,2.2740909028652446e-246,3.5714177089310765e-245
ASPS,SAMD8,33.517525,1.3681977,2.6778135968304494e-246,4.202524058345137e-245
ASPS,DCUN1D4,33.51702,1.0283526,2.7232237283704796e-246,4.270811847176142e-245
ASPS,IWS1,33.51526,0.9682354,2.8891534084454155e-246,4.527882831271872e-245
ASPS,SMYD2,33.484737,1.609426,8.039376238834707e-246,1.2590547129782538e-244
ASPS,STK24,33.464436,0.9260783,1.5872150794772624e-245,2.484024712352976e-244
ASPS,ITPKB,33.46238,1.3028967,1.7002824519643252e-245,2.6591283239372576e-244
ASPS,LETMD1,33.44285,1.1726732,3.2699509737142173e-245,5.110433796072115e-244
ASPS,DCDC2,33.432045,0.9719161,4.694169390007877e-245,7.331178495636868e-244
ASPS,AFF4,33.427254,0.824767,5.510374491011929e-245,8.599929120681238e-244
ASPS,DDX5,33.411076,0.7974283,9.466792792098357e-245,1.4764391669173497e-243
ASPS,PDGFD,33.386086,1.5865878,2.1826529233181012e-244,3.401703880836141e-243
ASPS,CUEDC1,33.377598,1.2092632,2.8982929931293986e-244,4.513915834628174e-243
ASPS,KLHL41,33.36625,1.6833329,4.234509269711428e-244,6.590430920806064e-243
ASPS,RNF39,33.34939,7.4365277,7.434860216462895e-244,1.156333995656513e-242
ASPS,LINC01580,33.348495,5.6197634,7.659500335784272e-244,1.1904492752543166e-242
ASPS,PARP4,33.331154,0.95180756,1.366243054574028e-243,2.1219668697852655e-242
ASPS,PEBP1,33.331127,0.919656,1.3675678610881291e-243,2.1225596354336787e-242
ASPS,GALNS,33.32065,1.5529864,1.9396007953083356e-243,3.0083194967893935e-242
ASPS,PRCP,33.30978,1.418477,2.7868522866142747e-243,4.319429112276464e-242
ASPS,P4HA3,33.289913,3.9871893,5.403949202520778e-243,8.36998463886649e-242
ASPS,NT5M,33.2614,2.5065835,1.3968048687931112e-242,2.1604875307346368e-241
ASPS,NHSL1,33.24902,1.3816841,2.108966630548211e-242,3.259772940967547e-241
ASPS,SMARCA1,33.242367,0.95808005,2.63154117200216e-242,4.064710643507797e-241
ASPS,NINL,33.219025,0.91132414,5.720191152757132e-242,8.829417139423818e-241
ASPS,RTTN,33.123882,1.0892271,1.3467660366548673e-240,2.0759568256793006e-239
ASPS,CBR3-AS1,33.11775,3.2426171,1.6504578141850423e-240,2.5423376528565623e-239
ASPS,COX5A,33.068012,1.1844366,8.571718407881817e-240,1.3194700599820813e-238
ASPS,RAPGEF1,33.05674,0.86198765,1.244636792797931e-239,1.914596788921219e-238
ASPS,VOPP1,33.03379,1.1660664,2.6589312130970946e-239,4.087380256198778e-238
ASPS,NDUFA9,33.026394,1.2444403,3.3955555253305925e-239,5.2161759110965864e-238
ASPS,MRPS5,32.993816,0.97200876,9.962372362722572e-239,1.52935327437293e-237
ASPS,HLCS,32.950012,1.0121895,4.228770907197643e-238,6.487286248567345e-237
ASPS,CD164,32.93554,0.92976034,6.814532278630789e-238,1.0439826339726747e-236
ASPS,PGM1,32.931366,1.4752562,7.81970071822491e-238,1.1971589432901469e-236
ASPS,UROS,32.924915,1.304735,9.672736627682613e-238,1.4798432209789067e-236
ASPS,RNF130,32.91069,0.904349,1.5454935507041453e-237,2.3628622526220644e-236
ASPS,ATXN2,32.90412,0.85162085,1.9187835758863106e-237,2.9315834606463966e-236
ASPS,ACAD10,32.87504,1.2072078,4.998867951264669e-237,7.627086321573652e-236
ASPS,TRIM37,32.825844,1.0294026,2.5196754857684303e-236,3.839221178552371e-235
ASPS,TMEFF1,32.769028,1.2011961,1.6270405940393776e-235,2.4707522651050065e-234
ASPS,MMP14,32.767265,1.0656064,1.7238096663310565e-235,2.6159363817114245e-234
ASPS,ARMH4,32.75526,1.5292089,2.5553312198352062e-235,3.872574350329381e-234
ASPS,LITAF,32.69325,1.3731744,1.9478340126709152e-234,2.945968041341327e-233
ASPS,ECM1,32.691566,3.3946004,2.0581791114902141e-234,3.110767018407473e-233
ASPS,PLEKHM2,32.690674,1.2997981,2.1190954162003993e-234,3.200687405475838e-233
ASPS,TSC1,32.663242,0.95415324,5.198083299803863e-234,7.840674575206831e-233
ASPS,UQCC1,32.66204,0.9324612,5.406311117232419e-234,8.149298840811493e-233
ASPS,HMBOX1,32.62948,0.8429183,1.5666206990676907e-233,2.359892826808459e-232
ASPS,CCSER2,32.58996,0.8702772,5.690944345343399e-233,8.566869731903224e-232
ASPS,MDM2,32.563866,0.8707538,1.3326337766064278e-232,2.0047408517732392e-231
ASPS,HADHB,32.55989,0.9781904,1.517018919946781e-232,2.2805952433802477e-231
ASPS,FGF2,32.552517,1.9088104,1.928922830266158e-232,2.897891074441915e-231
ASPS,TRAPPC10,32.55041,0.99041647,2.0660138102616184e-232,3.101777238154618e-231
ASPS,CHSY3,32.528652,1.3610094,4.196701859858515e-232,6.296451690407725e-231
ASPS,PCMTD1,32.509968,0.81332904,7.70958311714043e-232,1.1559238377831138e-230
ASPS,ALPK1,32.50701,1.1043223,8.487814041247685e-232,1.2717593541829502e-230
ASPS,CD2AP,32.47495,0.9982999,2.4081050553869705e-231,3.6057487871912025e-230
ASPS,PGR-AS1,32.42435,4.2778516,1.2456325834011167e-230,1.863893702755461e-229
ASPS,EML6,32.41427,1.8656781,1.727692355813683e-230,2.5835027553213913e-229
ASPS,ADCY1,32.392616,2.6127222,3.4871806406751274e-230,5.2110889985653215e-229
ASPS,PGR,32.364006,3.9105875,8.814476556909215e-230,1.3163224612690237e-228
ASPS,METTL25,32.348618,1.3181617,1.4508514923449688e-229,2.165213052733655e-228
ASPS,EPHB1,32.340416,1.0696114,1.8920771858300404e-229,2.8218155776742915e-228
ASPS,CD68,32.27754,4.130926,1.4456194232819735e-228,2.1545473590040275e-227
ASPS,LRPAP1,32.277203,1.1020288,1.4614166154024838e-228,2.176649962252343e-227
ASPS,GNPDA1,32.265068,1.9583639,2.1626054739227264e-228,3.21887805493591e-227
ASPS,PNPLA7,32.258408,1.3991096,2.681574432814073e-228,3.9886868876722216e-227
ASPS,IFI30,32.24824,4.0045176,3.723402169711218e-228,5.531034048141978e-227
ASPS,PTPDC1,32.23999,1.0177419,4.859356901391723e-228,7.213708909354929e-227
ASPS,PTPRB,32.229633,3.4967935,6.787967305075473e-228,1.0063452187135937e-226
ASPS,CCS,32.22854,1.1825033,7.031560914594757e-228,1.0417727345816658e-226
ASPS,TMEM163,32.196766,2.6539383,1.9588278581249964e-227,2.900225062309411e-226
ASPS,H6PD,32.18236,1.3146648,3.1156449062210014e-227,4.6099663783368595e-226
ASPS,NCOA4,32.17908,1.1612096,3.462778405555427e-227,5.120225231079164e-226
ASPS,TXN,32.166775,1.3563452,5.147172080814903e-227,7.605850799654589e-226
ASPS,ADAM17,32.1651,0.94917566,5.4320096042487e-227,8.021481374253084e-226
ASPS,CEP126,32.14773,1.7212485,9.500367360246193e-227,1.402005032408791e-225
ASPS,TMCC1,32.13638,0.871287,1.369026077265838e-226,2.018999467160399e-225
ASPS,ZNF621,32.129326,1.3543499,1.7175894144209895e-226,2.531391602589677e-225
ASPS,TXNL4A,32.120552,0.96980864,2.277289486073544e-226,3.354083762047455e-225
ASPS,ACTN4,32.115746,0.9826215,2.657834382207423e-226,3.912005413445262e-225
ASPS,FKBP5,32.09609,1.0094932,4.999260724768722e-226,7.353487752347718e-225
ASPS,INPP5F,32.07533,1.6375947,9.737819324425397e-226,1.4314149176759865e-224
ASPS,MAP4,32.071728,0.8054267,1.0930771724882131e-225,1.6057246584103942e-224
ASPS,NFX1,32.04531,0.8875439,2.5515625242171292e-225,3.7457869933141876e-224
ASPS,GYG2,32.025597,0.8756453,4.801354236953369e-225,7.039379615806878e-224
ASPS,ATP5MC3,32.024498,0.9657845,4.973796644443148e-225,7.287454002812047e-224
ASPS,TNIP1,32.005306,1.5029433,9.19986189277831e-225,1.3470585029081057e-223
ASPS,CUL4A,32.003,0.8435959,9.905311914773917e-225,1.4494086127567424e-223
ASPS,SOAT1,31.997492,1.5702668,1.1815968454126401e-224,1.7278646527622784e-223
ASPS,ASPSCR1,31.993261,1.2020174,1.3530627558823474e-224,1.9773167091644307e-223
ASPS,SP140L,31.97973,2.1407154,2.0867070853425997e-224,3.0474589847913827e-223
ASPS,RNF146,31.9754,1.1695573,2.3969479379729196e-224,3.498269347865146e-223
ASPS,TMEM165,31.93999,0.870589,7.44077785343655e-224,1.0845512020180672e-222
ASPS,PRCD,31.92655,3.6767027,1.1433407979117621e-223,1.6654294276378126e-222
ASPS,FBXL4,31.901464,0.924878,2.5480038733921883e-223,3.709109131351306e-222
ASPS,ARFGEF1,31.89456,0.7958952,3.176467635442939e-223,4.620969885949796e-222
ASPS,SCARF1,31.887045,4.6122084,4.037832717486587e-223,5.8702471128576e-222
ASPS,IMMT,31.88304,0.91803974,4.5882540836745706e-223,6.666149654815766e-222
ASPS,NOX4,31.852772,2.8841922,1.2049869893476351e-222,1.7484353446336898e-221
ASPS,SMAP1,31.847286,0.93367887,1.4352388382343582e-222,2.081188792169087e-221
ASPS,SPAG1,31.843683,2.96741,1.6099526128964916e-222,2.3330317806333254e-221
ASPS,PDE3A,31.839851,1.0848577,1.8190448928482675e-222,2.634337536264496e-221
ASPS,MAP3K4,31.838547,0.88153714,1.8963013811794634e-222,2.744454185430471e-221
ASPS,TMEM140,31.835445,3.7856004,2.0933354365069916e-222,3.0276679947679852e-221
ASPS,ANXA11,31.833143,1.3392146,2.25265237119938e-222,3.2560013881722574e-221
ASPS,PKP2,31.827797,3.5767899,2.6710039015404777e-222,3.855737190774115e-221
ASPS,DIAPH1,31.792965,1.0405399,8.097695301278786e-222,1.1681963638158916e-220
ASPS,APLP2,31.777628,0.91822463,1.3190583450963032e-221,1.9016917396791995e-220
ASPS,ZNF76,31.761978,1.3858168,2.1697556239275114e-221,3.1261427859467766e-220
ASPS,KTN1,31.75315,0.7799098,2.8726635921287497e-221,4.1362312310209545e-220
ASPS,GLI4,31.68885,1.9752007,2.2130610409404796e-220,3.182424199767763e-219
ASPS,BZW1,31.685003,1.0986441,2.5002062676067103e-220,3.5930486623556204e-219
ASPS,TANK,31.667011,0.91929805,4.423047007986903e-220,6.348257201195487e-219
ASPS,NEDD4L,31.65638,0.59818965,6.195373919262203e-220,8.88635373186717e-219
ASPS,FMO4,31.649792,2.543267,7.633410325162187e-220,1.0942031806864652e-218
ASPS,TMEM263,31.649685,1.1206815,7.659578788219698e-220,1.097255382742739e-218
ASPS,CYB561,31.637041,2.0302696,1.1431848050302228e-219,1.636601401857835e-218
ASPS,KIF13A,31.628216,0.84326905,1.5118126755054e-219,2.1629589486490164e-218
ASPS,RAB9A,31.601414,1.7001537,3.530509316462253e-219,5.047910556987484e-218
ASPS,TMBIM6,31.590178,0.8617499,5.037215873251612e-219,7.19762179222397e-218
ASPS,ZACN,31.565449,6.9566035,1.1006864898943142e-218,1.5717607522253513e-217
ASPS,SH3KBP1,31.55188,1.1443368,1.6897000212636297e-218,2.411331577586429e-217
ASPS,HMOX1,31.551529,3.28733,1.7085015784394874e-218,2.436617745423363e-217
ASPS,CCDC50,31.544395,0.8625852,2.1401859714108752e-218,3.0503410567828846e-217
ASPS,SSH2,31.513065,0.8192474,5.75282710553151e-218,8.194137595568775e-217
ASPS,ASCC3,31.495163,0.84116775,1.0117799910735454e-217,1.438414952565391e-216
ASPS,CTBP1,31.483376,0.9383935,1.4670285183431307e-217,2.0843104043757676e-216
ASPS,SYNPO,31.472124,1.8211708,2.0912153493276785e-217,2.969261920291445e-216
ASPS,CAPN7,31.466867,0.88387656,2.467922150743488e-217,3.5019286256293945e-216
ASPS,LARS2,31.446253,0.978891,4.7232904855201685e-217,6.693806824724899e-216
ASPS,FAM228B,31.440825,0.9790887,5.603206923804827e-217,7.935819497811682e-216
ASPS,MTX2,31.423218,0.87204444,9.75040306669021e-217,1.380080635319894e-215
ASPS,COX6C,31.420652,0.86833894,1.0569800006221433e-216,1.4951184735387386e-215
ASPS,ZCCHC2,31.419884,1.6199796,1.0828345804542086e-216,1.5307281553468572e-215
ASPS,ARHGEF6,31.410439,0.8472944,1.4573067109736054e-216,2.0588002216234143e-215
ASPS,POLR3B,31.397861,1.2803427,2.16402528957699e-216,3.055294174525104e-215
ASPS,AHCYL2,31.384047,0.9113003,3.340451189236504e-216,4.713282383308309e-215
ASPS,MESD,31.382355,1.2377859,3.5227641021013044e-216,4.96740639835776e-215
ASPS,PURPL,31.37069,2.5305288,5.081714402533528e-216,7.161176119537698e-215
ASPS,DCAF8,31.36922,0.77072775,5.3215636993477846e-216,7.494480040915011e-215
ASPS,CD44,31.361246,1.1310633,6.835581614278975e-216,9.62068569289233e-215
ASPS,TRIM38,31.358067,1.2802101,7.553065230339133e-216,1.0623858313048887e-214
ASPS,MRS2,31.350634,1.0616951,9.537407559381548e-216,1.3406580707300547e-214
ASPS,YPEL4,31.34745,4.652397,1.0539489653382588e-215,1.4805943486228161e-214
ASPS,VPS41,31.326384,0.8344203,2.0408645605574095e-215,2.865231249865533e-214
ASPS,STX18,31.309462,0.94697106,3.46904745297406e-215,4.867263898328006e-214
ASPS,ZNF664,31.263987,1.0665009,1.4411993984682223e-214,2.018306936062685e-213
ASPS,ZNF700,31.247742,1.4025682,2.3959358758091703e-214,3.3532672192217275e-213
ASPS,PCSK7,31.201498,1.2804472,1.0167586756237746e-213,1.4203695837934852e-212
ASPS,NBPF15,31.192957,0.9893648,1.3275621870642591e-213,1.8533986985037934e-212
ASPS,CAPS2,31.129128,1.1385795,9.721725245792629e-213,1.3564006612310173e-211
ASPS,SNX24,31.1276,1.0759102,1.0195715637263932e-212,1.421651675443772e-211
ASPS,RORA,31.121576,0.90236694,1.230060740108851e-212,1.714087737222891e-211
ASPS,PLEKHH1,31.119028,1.6482997,1.3316674563122943e-212,1.8545282242764967e-211
ASPS,NCS1,31.117487,1.5188484,1.3971495149972407e-212,1.9445176150286274e-211
ASPS,GK,31.107924,2.6572266,1.88199084619662e-212,2.6176887511529627e-211
ASPS,UQCRC1,31.083794,1.3625354,3.9884708420851973e-212,5.544196189075192e-211
ASPS,GEN1,31.071213,1.1386315,5.898939509439198e-212,8.194792201230194e-211
ASPS,MPDZ,31.025269,0.82928884,2.4599809463015636e-211,3.413185647134198e-210
ASPS,SNX14,31.02023,0.8730716,2.8767418042241044e-211,3.986519353698489e-210
ASPS,RHOB,31.014208,0.8214525,3.4681846891823624e-211,4.8031690110799426e-210
ASPS,CISD1,31.00281,1.6456385,4.9403427581896465e-211,6.837786824911316e-210
ASPS,FASTKD1,30.997643,1.142355,5.799731841056718e-211,8.017381147603282e-210
ASPS,NAMPT,30.984642,1.1119858,8.68066175442005e-211,1.1992528715974418e-209
ASPS,LARP4B,30.941296,0.8185066,3.32694025278039e-210,4.593422723240655e-209
ASPS,OPA1,30.9344,0.86143696,4.118828961465942e-210,5.683276871722319e-209
ASPS,TGFBR1,30.926655,0.98384964,5.235270993941449e-210,7.219348879819382e-209
ASPS,CCND1,30.923483,0.5002476,5.77538746064256e-210,7.959283208925952e-209
ASPS,OTULIN,30.915905,1.1680198,7.302368888047532e-210,1.0057516023593004e-208
ASPS,ACSM5,30.907927,6.1578145,9.347075771384936e-210,1.2865806742202934e-208
ASPS,CYCS,30.883322,1.5419154,2.0006084128057024e-209,2.7503782730722258e-208
ASPS,RAB3IP,30.882765,1.3696102,2.035362468261196e-209,2.7964488613075835e-208
ASPS,ASXL2,30.856735,0.85331666,4.5495261082754466e-209,6.24692404312013e-208
ASPS,LYN,30.853441,2.5634978,5.036737067541536e-209,6.91169315274526e-208
ASPS,CAP2,30.851204,0.88357973,5.397093130523702e-209,7.401680737503711e-208
ASPS,FBXW8,30.798943,0.8830307,2.707347217778338e-208,3.708390087407273e-207
ASPS,ARG1,30.790573,6.9646807,3.5040979199984257e-208,4.796820175764269e-207
ASPS,TAPBP,30.766407,1.0925535,7.378358759614627e-208,1.0094222728579161e-206
ASPS,MAPK9,30.763338,1.1332633,8.109345748153643e-208,1.1087534997703386e-206
ASPS,CARS2,30.762468,0.93873745,8.329654964961712e-208,1.138183879699231e-206
ASPS,CAMTA1,30.737072,0.84196985,1.8203482980272897e-207,2.485857915479621e-206
ASPS,MAGED1,30.727287,0.7721729,2.4596581919060678e-207,3.3568591636656187e-206
ASPS,PACSIN2,30.707224,0.9705494,4.5584639636418776e-207,6.21746857586427e-206
ASPS,SLC25A3,30.698727,0.67616874,5.918956107887865e-207,8.063323680872664e-206
ASPS,CALU,30.69754,0.8669509,6.138589052463264e-207,8.357468035431685e-206
ASPS,ZNF432,30.685966,1.8749627,8.760165482514897e-207,1.1919439188875317e-205
ASPS,ZNF330,30.679075,1.3922495,1.0825116006434157e-206,1.472019551207255e-205
ASPS,FTX,30.67253,0.86848855,1.3234963780165574e-206,1.7986283808733469e-205
ASPS,OSTF1,30.671679,1.6306151,1.3585574899280146e-206,1.845162118939648e-205
ASPS,LY96,30.669315,2.3861938,1.460743150130157e-206,1.9827517849022428e-205
ASPS,WDR7,30.645401,0.8831071,3.0432203145254517e-206,4.128250342278197e-205
ASPS,TJP1,30.64166,0.7424585,3.4131719049050567e-206,4.627315284330621e-205
ASPS,HPSE2,30.640907,1.3913529,3.4929463453343343e-206,4.732616345680265e-205
ASPS,SLC25A4,30.631874,2.3915887,4.6080072272632814e-206,6.239663215978348e-205
ASPS,RAB30,30.629808,1.3009421,4.909226510672226e-206,6.643544354941577e-205
ASPS,MCCC1,30.62082,1.0533086,6.46692109918142e-206,8.746277604391697e-205
ASPS,XIAP,30.607622,1.0297576,9.690686610084249e-206,1.309843256215892e-204
ASPS,ANKMY1,30.6059,1.112173,1.021562354628842e-205,1.379967634509129e-204
ASPS,CASP4,30.573893,2.2014802,2.7223011329434057e-205,3.6751881821770455e-204
ASPS,DDI2,30.52762,1.1979904,1.1208044609847536e-204,1.51130643465919e-203
ASPS,NFKBIZ,30.526464,1.3599781,1.1611090502016797e-204,1.5647161182508265e-203
ASPS,IGFBP1,30.525974,6.39454,1.1786777045913203e-204,1.5874411575001594e-203
ASPS,MCAM,30.521751,1.9455636,1.3409775726605671e-204,1.804946188560171e-203
ASPS,SLC12A4,30.518644,1.4308565,1.4745424996254943e-204,1.983537295521324e-203
ASPS,FAM110B,30.517656,0.799497,1.519722653352787e-204,2.0430918944865275e-203
ASPS,SIK3,30.516268,0.796007,1.5855709493774756e-204,2.1290736405572845e-203
ASPS,SLC9A8,30.509089,1.1524439,1.9742851991331895e-204,2.6494507099876225e-203
ASPS,SOS2,30.485477,0.86228406,4.05953906270378e-204,5.44457250334616e-203
ASPS,AVPI1,30.477472,3.699243,5.1828569228814796e-204,6.947003874297063e-203
ASPS,SLC17A5,30.451063,2.0575213,1.1596689703815075e-203,1.5534732249068942e-202
ASPS,PLEKHH2,30.450754,1.4272016,1.1707030092633881e-203,1.5673213101411392e-202
ASPS,TBRG1,30.414482,1.0578738,3.5347492795046175e-203,4.726650774524743e-202
ASPS,DPP9,30.412695,1.4564363,3.732454241175605e-203,4.988057167319299e-202
ASPS,NRP2,30.400003,0.90078133,5.492428612736754e-203,7.335733289592917e-202
ASPS,IRF2,30.398632,1.1483718,5.726543119676692e-203,7.643882141656225e-202
ASPS,LINC00963,30.392618,1.546896,6.876458203027293e-203,9.173366440967943e-202
ASPS,PRDM4,30.367817,1.395114,1.4619497527798975e-202,1.9491219897104025e-201
ASPS,MPG,30.35544,1.6262908,2.129678979399525e-202,2.8376806057659155e-201
ASPS,LGALS8,30.302645,1.191726,1.0579526112745658e-201,1.407996659771384e-200
ASPS,JPH2,30.288847,2.1093912,1.6077227504663404e-201,2.138404284825354e-200
ASPS,PDK4,30.248701,2.7055364,5.426497247519316e-201,7.213427085376386e-200
ASPS,CTNS,30.21662,2.5665843,1.4329177486069734e-200,1.9025258957168106e-199
ASPS,RESF1,30.205198,1.0557561,2.024063362675915e-200,2.685822286380983e-199
ASPS,SLMAP,30.192041,0.84156096,3.012822403588399e-200,3.9931430031070038e-199
ASPS,RAD9A,30.168734,1.1330578,6.092659297460078e-200,8.065605734667003e-199
ASPS,PCED1B,30.16734,3.106935,6.354606156647454e-200,8.4074316023134e-199
ASPS,AGAP3,30.162378,1.0560476,7.38157605103477e-200,9.760421212017477e-199
ASPS,MTMR14,30.142845,1.2765268,1.3311152589198785e-199,1.7590574810329928e-198
ASPS,PTPN1,30.116558,0.9000532,2.9414721121175253e-199,3.884849171549584e-198
ASPS,UTP25,30.114584,1.5088298,3.1218920784083e-199,4.120714441324269e-198
ASPS,C2CD3,30.110113,0.98750657,3.5724071371448745e-199,4.712603905125756e-198
ASPS,FZD10-AS1,30.104033,2.5469325,4.290799177643612e-199,5.656967515692413e-198
ASPS,ANKMY2,30.102442,1.4200656,4.501686641614597e-199,5.931525636389724e-198
ASPS,GPX3,30.086847,4.1347914,7.201477979724041e-199,9.48328039401343e-198
ASPS,CLCN4,30.05648,1.8229553,1.796575791597028e-198,2.3630589240146766e-197
ASPS,CUX1,30.055893,0.75351757,1.828634066346844e-198,2.4038206578934417e-197
ASPS,SRPX2,30.023888,2.3468468,4.78756571314887e-198,6.28979371712874e-197
ASPS,HCP5,30.010376,2.5568976,7.185464447006268e-198,9.434590278872582e-197
ASPS,DCTN2,29.993935,0.83134526,1.1773721460464962e-197,1.5441002416536362e-196
ASPS,CLTC,29.984417,0.6989714,1.5667881848774703e-197,2.0536149155892526e-196
ASPS,ANKRD50,29.979025,1.1398199,1.8421159190051985e-197,2.4130860743429564e-196
ASPS,RNF38,29.959095,0.8251554,3.3495935342565175e-197,4.38525901619796e-196
ASPS,ARHGDIA,29.956432,1.1937436,3.628107258999637e-197,4.747125224638769e-196
ASPS,DUSP3,29.949377,1.983162,4.482773515282672e-197,5.861988260397242e-196
ASPS,CSMD2,29.947754,0.8832204,4.7064218581498836e-197,6.150872469086128e-196
ASPS,DCAF6,29.939692,0.7624719,5.993012590331298e-197,7.823245263654632e-196
ASPS,GCN1,29.919441,0.866394,1.0994234548893954e-196,1.433518241731509e-195
ASPS,TBK1,29.907612,1.2652164,1.5668413891461581e-196,2.041793020424684e-195
ASPS,FOXK1,29.90426,0.79644984,1.7321901310044687e-196,2.2559571121675677e-195
ASPS,PPP2R3A,29.89258,1.004101,2.457129682798088e-196,3.196399046900056e-195
ASPS,MTCH1,29.889782,0.86947197,2.6716499189632345e-196,3.473453577485129e-195
ASPS,SCRN1,29.855137,1.2699319,7.529491397607164e-196,9.783556807341178e-195
ASPS,LCOR,29.812363,0.76739603,2.7013864555429442e-195,3.506038188119606e-194
ASPS,WDR1,29.80832,0.9975471,3.047947353391541e-195,3.9535478494568664e-194
ASPS,SEC24D,29.80481,0.92168784,3.3843206856369623e-195,4.3873350823882393e-194
ASPS,MIR3681HG,29.784792,3.3033164,6.148809908562115e-195,7.966549625341991e-194
ASPS,OSBPL3,29.7818,1.1117228,6.722824860727263e-195,8.705245885538955e-194
ASPS,CAMK2D,29.781046,0.65413177,6.875333851820549e-195,8.897607149811469e-194
ASPS,PYROXD2,29.75767,1.7085958,1.3799711271336717e-194,1.7848419664450163e-193
ASPS,ALDH1A1,29.757145,3.2432845,1.401707197978285e-194,1.8119138707927228e-193
ASPS,ST3GAL6,29.753378,2.2098844,1.5681454793429985e-194,2.0247340225251968e-193
ASPS,NDRG1,29.74689,1.6020817,1.90251439340127e-194,2.455050827035297e-193
ASPS,INTS9,29.732706,1.1013472,2.9020744231143265e-194,3.7406176914196973e-193
ASPS,SPTBN1,29.73218,0.7241479,2.947884175287876e-194,3.7974890306155494e-193
ASPS,LPAR5,29.732124,6.651142,2.952860379517185e-194,3.80172327465871e-193
ASPS,NDUFB5,29.668604,1.2047443,1.9520932557270717e-193,2.510391926865014e-192
ASPS,ADPGK,29.66003,1.0434096,2.5180914821653885e-193,3.2364162653416373e-192
ASPS,EXPH5,29.647535,2.4556613,3.649041035240057e-193,4.687309845780678e-192
ASPS,CCDC69,29.623644,4.889173,7.413359623945056e-193,9.517265164682456e-192
ASPS,CHCHD10,29.61365,1.6392053,9.97071214131184e-193,1.2793094454972802e-191
ASPS,EMB,29.61198,2.3108745,1.0476375546550246e-192,1.3434235423083379e-191
ASPS,USP40,29.57952,0.8238076,2.7409966536352713e-192,3.512877544992129e-191
ASPS,TSNARE1,29.576035,1.1452028,3.038931643887486e-192,3.8924961096009037e-191
ASPS,PLBD1-AS1,29.545582,2.703395,7.483893427560482e-192,9.569603499275491e-191
ASPS,CMC2,29.535765,1.181796,1.0004960536080895e-191,1.2786010043412863e-190
ASPS,PPP3CC,29.527298,1.0059613,1.2851087206257386e-191,1.6413945378934308e-190
ASPS,PPP2R2D,29.507242,0.8477546,2.324517250219461e-191,2.9656043489903045e-190
ASPS,ATP6V0A1,29.478748,0.9524548,5.391721659107902e-191,6.870934084837108e-190
ASPS,PHF7,29.465868,2.110636,7.884435689706307e-191,1.0041835042266012e-189
ASPS,ZC3H12C,29.46298,1.0072576,8.585702214934798e-191,1.0928802508320565e-189
ASPS,PRR5L,29.453638,1.1243542,1.130926238658112e-190,1.4387504240249186e-189
ASPS,DCLK2,29.447575,0.91072416,1.3523025006498396e-190,1.7194106088770983e-189
ASPS,STAT3,29.429802,0.72162545,2.283226286967245e-190,2.8997746945935583e-189
ASPS,OOSP3,29.418995,8.101469,3.139239820681179e-190,3.984692169454593e-189
ASPS,ELF1,29.415743,0.8796517,3.454700678694631e-190,4.3826402916585496e-189
ASPS,RABEP1,29.383383,0.8246533,8.954706268055434e-190,1.134716579744299e-188
ASPS,VRK2,29.374468,1.04883,1.1639564646925072e-189,1.4741046841814785e-188
ASPS,DNAJB6,29.362818,0.75280565,1.6394450631596723e-189,2.0739579059251505e-188
ASPS,PHYKPL,29.34336,0.8972192,2.904161519779939e-189,3.6697448064372556e-188
ASPS,RAP1GAP,29.342188,1.3509688,3.0059611488965492e-189,3.7962489144734475e-188
ASPS,CDK8,29.32304,0.8128791,5.274740800867169e-189,6.65777014714053e-188
ASPS,COMMD10,29.322586,0.7901247,5.3454167489961925e-189,6.743195287901308e-188
ASPS,DNM1L,29.318598,0.8341007,6.009504990684999e-189,7.576689625510695e-188
ASPS,BTBD1,29.302975,0.9614988,9.504732783871802e-189,1.1976708359520432e-187
ASPS,GIPR,29.285622,4.8721294,1.581116956124756e-188,1.9912164016557153e-187
ASPS,NCOA6,29.27932,0.80872166,1.9019084163056988e-188,2.3938729814854445e-187
ASPS,SLC46A3,29.258768,2.211434,3.473273718007173e-188,4.36681704043304e-187
ASPS,RNF103,29.235117,1.2523693,6.942401741913688e-188,8.723548364141125e-187
ASPS,PTCHD4,29.23215,1.4360137,7.572167749225995e-188,9.509577856938115e-187
ASPS,NBEAL1,29.230165,0.7869396,8.024831332930337e-188,1.00724388816284e-186
ASPS,SIN3B,29.207672,0.7889929,1.549553771001072e-187,1.9438521525294942e-186
ASPS,ENTPD5,29.191889,1.4305736,2.4581222375425573e-187,3.0818964320833008e-186
ASPS,ARHGAP27,29.186777,3.3841894,2.8541181220950085e-187,3.576387992079519e-186
ASPS,KANSL3,29.18395,0.8332853,3.0998804502204625e-187,3.882181943918281e-186
ASPS,ST8SIA5,29.181269,2.1439168,3.352460942656917e-187,4.19616982839232e-186
ASPS,OGDHL,29.134346,2.4892285,1.319028194074438e-186,1.6491516393136238e-185
ASPS,NACC2,29.123058,1.1620547,1.8332531024426475e-186,2.2908029467224756e-185
ASPS,RNF216,29.109608,0.76415247,2.7133489848733904e-186,3.3886747449820006e-185
ASPS,SMG7,29.108341,0.8220653,2.8153580017807976e-186,3.514122674990396e-185
ASPS,NDUFAF5,29.094572,1.2351075,4.204941830121117e-186,5.2427820435942236e-185
ASPS,KIF9-AS1,29.066221,0.9608404,9.599225211537489e-186,1.1961825215152336e-184
ASPS,IGF1,29.06404,1.8713896,1.0228395522480317e-185,1.2738795862391786e-184
ASPS,SNCA,29.029501,2.1089752,2.792688202749516e-185,3.476186283345014e-184
ASPS,MYOM1,29.01281,2.2199354,4.535659008981578e-185,5.642620563688801e-184
ASPS,ITSN2,29.012339,0.8027508,4.5980969794298354e-185,5.717136603429196e-184
ASPS,NUP42,29.01224,0.97287107,4.611396406533355e-185,5.730506688516463e-184
ASPS,PARP9,29.006731,1.5696099,5.4113262809428925e-185,6.720855295398443e-184
ASPS,CALCOCO2,29.000492,1.0123868,6.486253257342268e-185,8.051468811720227e-184
ASPS,BORCS5,28.983679,1.0136032,1.0566804630308675e-184,1.3102255548490178e-183
ASPS,IGDCC4,28.95358,1.3518317,2.529582085125704e-184,3.1348152437089192e-183
ASPS,CFB,28.946459,3.528867,3.109585915678657e-184,3.8514711630351225e-183
ASPS,SPG21,28.94064,0.9323617,3.680693660155031e-184,4.556326227821175e-183
ASPS,MED27,28.929556,0.83602595,5.074408259183999e-184,6.278150515279598e-183
ASPS,SMURF1,28.913307,0.80680805,8.123148069476913e-184,1.0044585016680105e-182
ASPS,PIAS2,28.900057,0.7308042,1.1919781811451886e-183,1.4731174611022772e-182
ASPS,HERC2,28.895624,0.70513046,1.3550832928418506e-183,1.6737732988696955e-182
ASPS,TAPT1-AS1,28.895302,0.78984356,1.3677483209766229e-183,1.68849017902243e-182
ASPS,MRRF,28.894976,0.96878695,1.3807323705160468e-183,1.7035845393894535e-182
ASPS,AIG1,28.893595,1.2927089,1.4370039085615447e-183,1.772042354091921e-182
ASPS,DIP2A,28.890501,0.76801133,1.5715654382350996e-183,1.9369156729179034e-182
ASPS,TPCN2,28.889044,1.1615105,1.6392018906926284e-183,2.0191701450485824e-182
ASPS,GRIP1,28.880495,0.67795545,2.0989709256520553e-183,2.582686751328568e-182
ASPS,MRAS,28.861118,1.5413488,3.6749512936156055e-183,4.519386823104875e-182
ASPS,LINC00571,28.855637,1.5057819,4.305396408113983e-183,5.288916275360545e-182
ASPS,LINC01193,28.8433,4.7802258,6.148787940225019e-183,7.549289285038954e-182
ASPS,ANKS1A,28.838686,0.6944119,7.024998107434265e-183,8.620369815038611e-182
ASPS,PTER,28.836018,2.588288,7.587594819427044e-183,9.305657842572514e-182
ASPS,RRAGC,28.810007,2.15939,1.6071954736551583e-182,1.9689675631251683e-181
ASPS,PARVB,28.751013,1.1458184,8.797506844634795e-182,1.076606261764579e-180
ASPS,FAM83G,28.747444,4.3949876,9.748839406868074e-182,1.1923784285411196e-180
ASPS,POLR2J3,28.734364,0.8063383,1.4204644026360733e-181,1.7364232146292684e-180
ASPS,MOCOS,28.732895,3.265071,1.481798527116851e-181,1.8104167129622547e-180
ASPS,TAOK1,28.715927,0.7102846,2.4138599152864795e-181,2.945982505071704e-180
ASPS,GALNT5,28.701838,3.2319486,3.6190319560163237e-181,4.414434372365711e-180
ASPS,SLC3A2,28.701431,0.9322669,3.661467120218414e-181,4.463776681501376e-180
ASPS,RBM12B,28.696402,0.79935664,4.2308826374746994e-181,5.155171291627943e-180
ASPS,PLA2G15,28.68681,3.01615,5.572982704411497e-181,6.786795225258698e-180
ASPS,WDR11,28.668083,0.7853225,9.541407945432444e-181,1.1606993827673359e-179
ASPS,HNRNPF,28.661032,0.6746636,1.168122834267291e-180,1.4202379462552881e-179
ASPS,ZDHHC7,28.646347,1.093213,1.7800982077532542e-180,2.1631268987843948e-179
ASPS,STAT1,28.643242,1.1137261,1.945979498478463e-180,2.36342518150339e-179
ASPS,UQCRC2,28.61949,0.8155404,3.844432271235521e-180,4.666609938735458e-179
ASPS,WDR81,28.613398,2.277678,4.577662012470679e-180,5.553654101921975e-179
ASPS,EFL1,28.61265,1.1147791,4.676786022419799e-180,5.670855034189524e-179
ASPS,FAM167A,28.609081,3.9725442,5.180031022154172e-180,6.277684337834121e-179
ASPS,TECPR2,28.60326,0.917569,6.119776992573077e-180,7.412571647893277e-179
ASPS,CREBRF,28.596233,1.124579,7.483746580213118e-180,9.059801871312332e-179
ASPS,HECW2,28.592197,1.1131841,8.400340132549661e-180,1.0163959929195169e-178
ASPS,KLF8,28.578175,1.9397625,1.2549003740304212e-179,1.5175460998148647e-178
ASPS,SUCLG1,28.549372,0.98178625,2.8598825348976056e-179,3.4565873495097e-178
ASPS,AACS,28.54185,1.3781654,3.545722539631264e-179,4.283225214943725e-178
ASPS,MGAT5,28.529196,0.7308452,5.0901105915109954e-179,6.14554393036239e-178
ASPS,STX17,28.511189,0.8942002,8.511823952350973e-179,1.027123850121494e-177
ASPS,MAVS,28.492373,0.8921801,1.4562604646420128e-178,1.756331283856833e-177
ASPS,MET,28.486086,0.7801903,1.742263153095145e-178,2.1001409887737676e-177
ASPS,KMT2D,28.48065,0.7944272,2.0343429077896734e-178,2.450904022473587e-177
ASPS,MBD6,28.463564,1.1149805,3.310999925240533e-178,3.9868407339506794e-177
ASPS,PKM,28.46113,0.5854547,3.548777695695729e-178,4.268585892123591e-177
ASPS,BICD1,28.450434,0.7683606,4.813121179641807e-178,5.786286973709341e-177
ASPS,VEGFB,28.439777,1.3975766,6.519989187047181e-178,7.83408204241841e-177
ASPS,DEXI,28.43418,2.0651448,7.646589140499351e-178,9.182843575610347e-177
ASPS,TIMM17A,28.418823,1.261562,1.1838235524671675e-177,1.4209039492412589e-176
ASPS,PTPRG,28.417603,0.7538908,1.2256216590620577e-177,1.4702886693598938e-176
ASPS,MTM1,28.41551,1.3954098,1.3008168109228938e-177,1.5596634166126652e-176
ASPS,KCTD1,28.413868,1.1068746,1.363057375994878e-177,1.6334188629800174e-176
ASPS,TMEM62,28.376686,1.5222869,3.922752962372781e-177,4.6958274158616715e-176
ASPS,ARMH3,28.372421,0.789231,4.428199527023897e-177,5.2980664729225304e-176
ASPS,MRGPRF,28.371502,4.9052534,4.545334518581413e-177,5.4353216440315994e-176
ASPS,ABL1,28.355467,0.7485175,7.166791675461026e-177,8.565514957846542e-176
ASPS,NDUFA10,28.329254,0.7209966,1.5078928751269525e-176,1.801227662140768e-175
ASPS,WASL,28.324253,0.7954391,1.7377462204498024e-176,2.074693829773093e-175
ASPS,WASHC2A,28.323801,1.4320177,1.760117843459534e-176,2.0991760501884905e-175
ASPS,WAPL,28.321524,0.77049816,1.8775242969893648e-176,2.238012939817037e-175
ASPS,SOCS6,28.30298,1.3142295,3.176084314621404e-176,3.781892989447339e-175
ASPS,GK5,28.298655,1.1694427,3.5900946789304474e-176,4.272611356389726e-175
ASPS,PLD3,28.294989,0.7077942,3.983118851361863e-176,4.737848295449192e-175
ASPS,DUOXA1,28.282873,2.5487988,5.613847794507171e-176,6.674043561298672e-175
ASPS,LINC02474,28.277477,8.517219,6.540367301894281e-176,7.771434325719683e-175
ASPS,SMIM14,28.26755,1.0271267,8.662640761839666e-176,1.0287743026132014e-174
ASPS,DMD,28.264647,0.7365818,9.404700725905267e-176,1.1163121826819519e-174
ASPS,WHAMM,28.24409,1.437398,1.6823701377709775e-175,1.995874536137894e-174
ASPS,ANKRD23,28.20575,2.3942947,4.971168924972585e-175,5.891319465850871e-174
ASPS,LGALS3BP,28.200224,1.5238879,5.810834214648642e-175,6.882780210561457e-174
ASPS,KRBA2,28.19654,1.2217556,6.447499772458076e-175,7.632876506005734e-174
ASPS,MIR4300HG,28.193764,3.249406,6.97320640991962e-175,8.250894335186175e-174
ASPS,GNAO1,28.192013,1.8239765,7.32647724498009e-175,8.664338959447027e-174
ASPS,TUBB2A,28.175774,1.6960819,1.1585779305371925e-174,1.3694220759842184e-173
ASPS,TMEM127,28.165134,1.7658055,1.5640435853551158e-174,1.845768268925898e-173
ASPS,BBC3,28.158749,2.514533,1.8725734930084486e-174,2.2087141750605418e-173
ASPS,TXNDC11,28.1536,1.1641228,2.1651399851665557e-174,2.5524607315962983e-173
ASPS,PTP4A3,28.12612,1.6328607,4.6961866928691525e-174,5.5304909221883975e-173
ASPS,NUDT4,28.105373,0.64065295,8.421634522085673e-174,9.91259858365785e-173
ASPS,ABHD3,28.100239,1.236341,9.730338601735276e-174,1.1447008375956738e-172
ASPS,NPEPPS,28.09196,0.6715843,1.228185622019766e-173,1.4441127180540666e-172
ASPS,SYNE2,28.087729,0.61600894,1.3834917279779976e-173,1.6258736991198346e-172
ASPS,ABCG1,28.068516,1.297921,2.3743690518077845e-173,2.788892250048757e-172
ASPS,MAST4,28.046904,0.97207195,4.35737498641879e-173,5.1127593362541644e-172
ASPS,FBXO31,28.046286,1.0813961,4.433608580791509e-173,5.199497712908438e-172
ASPS,CXXC5,28.029377,1.2215842,7.12711103657829e-173,8.353939264489292e-172
ASPS,RETSAT,28.024763,1.8599888,8.112648294328127e-173,9.504172299003357e-172
ASPS,TLR2,28.020588,3.9361317,9.120886734481757e-173,1.0674235879329795e-171
ASPS,CALML4,28.00945,2.208346,1.2465256081187724e-172,1.4580591897459965e-171
ASPS,GRK4,28.008848,1.1646205,1.2677512581672855e-172,1.4821164709119358e-171
ASPS,LINS1,28.005863,1.3153372,1.3784754424046122e-172,1.610726367150353e-171
ASPS,SDHD,28.002384,1.1373305,1.5197330434440458e-172,1.7748620727923327e-171
ASPS,SYTL3,28.000597,1.3857316,1.597823595396837e-172,1.8650943990874387e-171
ASPS,MFSD8,27.96821,1.1846823,3.959562132088421e-172,4.619489154103157e-171
ASPS,PPIF,27.96434,1.984584,4.412723323425181e-172,5.145509761330762e-171
ASPS,GSTK1,27.948812,0.8712292,6.815026414653102e-172,7.942629179791199e-171
ASPS,CAPN3,27.938192,1.5027348,9.173202662798685e-172,1.0685451652499193e-170
ASPS,FMN2,27.937525,3.4463575,9.346027168645302e-172,1.0881135097276904e-170
ASPS,ZNF564,27.932346,1.31783,1.0802691763866642e-171,1.2570557298129203e-170
ASPS,NDEL1,27.913868,0.8360725,1.8109434686033142e-171,2.1051282417829332e-170
ASPS,MAPKAP1,27.908638,0.7203552,2.0959573871494246e-171,2.43392781206387e-170
ASPS,UGCG,27.901518,0.8950027,2.557332390879899e-171,2.96816737786241e-170
ASPS,SERAC1,27.89978,2.110078,2.6845072535934146e-171,3.1141667908309177e-170
ASPS,FOXP1,27.870407,0.6929478,6.095744943445801e-171,7.067735185587211e-170
ASPS,FAP,27.859196,1.793033,8.334608307379354e-171,9.658617917485703e-170
ASPS,ATRNL1,27.854427,0.5290785,9.520308558400555e-171,1.1026996608687828e-169
ASPS,ARMCX2,27.853704,1.19153,9.714026204308645e-171,1.1245584348146402e-169
ASPS,RFFL,27.845858,1.3355551,1.2090375307908488e-170,1.3989403408970722e-169
ASPS,IL6ST,27.830023,0.70153874,1.8798733311374825e-170,2.1740261725205057e-169
ASPS,RASGRP3,27.826828,4.216422,2.054882480574281e-170,2.375199292517935e-169
ASPS,SPTLC2,27.789064,1.0349026,5.880708120196497e-170,6.79390843146931e-169
ASPS,MCM9,27.78094,1.0295292,7.372417938918641e-170,8.512892032599489e-169
ASPS,JADE3,27.777586,1.3896791,8.093190254709829e-170,9.340371624730497e-169
ASPS,NECTIN3,27.773973,0.88934755,8.94836201614347e-170,1.032203419647918e-168
ASPS,MAFF,27.77028,3.4838345,9.916394095709134e-170,1.1426955920324324e-168
ASPS,LINC00342,27.764532,0.7826767,1.1634735594924068e-169,1.3400190612270528e-168
ASPS,FAM135A,27.741907,0.8462788,2.1817556062483242e-169,2.508963204834877e-168
ASPS,MEGF8,27.71635,1.3200966,4.435894182574992e-169,5.098559682270183e-168
ASPS,FLG-AS1,27.707489,0.74713475,5.6723166542936e-169,6.516359688865618e-168
ASPS,BMPER,27.657509,1.058272,2.266844365487393e-168,2.5988452595666726e-167
ASPS,HUS1,27.645115,1.1899372,3.1949473358670714e-168,3.659149607821295e-167
ASPS,FLACC1,27.640104,2.745041,3.6701604265172298e-168,4.20126960319279e-167
ASPS,TRHDE,27.623863,1.7138299,5.752242214901299e-168,6.577957878371632e-167
ASPS,SLC44A3,27.623644,2.6719418,5.787305521878536e-168,6.6146932844020545e-167
ASPS,MGST2,27.616062,1.8482554,7.137416790001684e-168,8.153683495380097e-167
ASPS,MCRIP1,27.605627,1.2962046,9.524244627829655e-168,1.0874841468762375e-166
ASPS,ARHGEF11,27.599812,0.77618504,1.1185070615559798e-167,1.2764706602594993e-166
ASPS,MROH7,27.58978,1.870484,1.4757499480907638e-167,1.6833123457568493e-166
ASPS,RNF125,27.583294,2.8423712,1.7653601373555513e-167,2.0126357594319494e-166
ASPS,TNFRSF14-AS1,27.565796,5.3150496,2.8618701337488037e-167,3.261082904304649e-166
ASPS,INO80D,27.555243,0.7748131,3.829469450366907e-167,4.361447873507451e-166
ASPS,CASP7,27.50937,1.2339422,1.3562791904140681e-166,1.5431275621976039e-165
ASPS,OSBPL8,27.491693,0.7240992,2.2068120471134675e-166,2.5082982383984137e-165
ASPS,ELF4,27.460224,2.8153033,5.2451042062898486e-166,5.958660785590764e-165
ASPS,XKR6,27.424078,0.8161671,1.4162165675868399e-165,1.6080703256075595e-164
ASPS,ZNF592,27.415213,1.016967,1.806439222113047e-165,2.050121769725372e-164
ASPS,UBE2E2,27.412764,0.63123137,1.9321232184294495e-165,2.1916548906630422e-164
ASPS,DOCK11,27.406605,1.5481015,2.287978469563989e-165,2.5926966494228386e-164
ASPS,SETD4,27.387722,1.0986842,3.840794505104143e-165,4.350129860964708e-164
ASPS,PPP1R3B,27.377028,1.3472943,5.149443067040184e-165,5.829387133990913e-164
ASPS,NEK7,27.375544,0.7130883,5.36322463862793e-165,6.0683444189201384e-164
ASPS,URGCP,27.373655,0.83185905,5.648096494236862e-165,6.387457869487467e-164
ASPS,NEGR1,27.368166,0.98201877,6.565361305841538e-165,7.421067613659658e-164
ASPS,ZNF521,27.347912,0.54393077,1.1434794765250884e-164,1.2912195493826952e-163
ASPS,RASA3,27.34684,0.8118128,1.1774870108410183e-164,1.3289541213127942e-163
ASPS,RILP,27.3264,3.930086,2.0603835796575928e-164,2.324257266175144e-163
ASPS,SERPINB1,27.311584,1.974568,3.090082728232024e-164,3.484083757458001e-163
ASPS,ABCA10,27.30471,0.7789413,3.729023362665348e-164,4.202387119518461e-163
ASPS,FBRSL1,27.302984,0.7439662,3.9092481272651965e-164,4.403284739945107e-163
ASPS,POLR1A,27.274832,0.73721117,8.436962613824402e-164,9.498441401906861e-163
ASPS,PDLIM4,27.274616,1.3556908,8.486979565269835e-164,9.549973755819882e-163
ASPS,DLG5,27.269218,0.86604565,9.834714900104116e-164,1.1060982450117098e-162
ASPS,RBM14,27.20894,0.78375405,5.0909526935458057e-163,5.717160198016385e-162
ASPS,NCOR2,27.18352,0.6538721,1.0173282918558923e-162,1.1418939255968506e-161
ASPS,PFKL,27.165104,1.0494831,1.6791517313915482e-162,1.883814043617487e-161
ASPS,QRICH2,27.154743,2.0350976,2.2256610346569514e-162,2.4944472900873853e-161
ASPS,CAPN1,27.152195,1.1812696,2.385280435071392e-162,2.672012752179277e-161
ASPS,BCAR1,27.151773,1.3270082,2.4128164657900717e-162,2.7015141573435604e-161
ASPS,RCAN1,27.146328,1.7781385,2.7977853631790254e-162,3.130987548400993e-161
ASPS,USP2,27.121641,3.2036278,5.47160293882995e-162,6.120200006877138e-161
ASPS,LMO7,27.117908,0.8154063,6.055559751994759e-162,6.7700135230323916e-161
ASPS,SEC11A,27.112219,0.8412372,7.067065126642887e-162,7.896936478406067e-161
ASPS,FZD3,27.11055,1.5040379,7.394720495221267e-162,8.258966984861271e-161
ASPS,MANBA,27.105043,1.1324304,8.586639615987582e-162,9.585432765763915e-161
ASPS,SERINC2,27.099054,1.9723706,1.0102481882681634e-161,1.1272005690121477e-160
ASPS,ANXA2,27.085182,0.7575051,1.4718515431594997e-161,1.641428096075547e-160
ASPS,GFM1,27.06384,1.0733533,2.6250102759236264e-161,2.9259958523853993e-160
ASPS,JADE2,27.047056,1.6347865,4.13650428111839e-161,4.6039579053694053e-160
ASPS,SYT17,27.046352,0.970034,4.21602888065281e-161,4.690149775535912e-160
ASPS,SNX1,27.02308,0.72138214,7.916044908027399e-161,8.801906652922757e-160
ASPS,TRHDE-AS1,27.019081,2.6755278,8.820719399900714e-161,9.802977288630398e-160
ASPS,RIC8B,26.996946,0.8090757,1.6050543925868266e-160,1.7829096300674497e-159
ASPS,ZNF841,26.985449,1.8241277,2.190109563638714e-160,2.4315942639215224e-159
ASPS,CHRFAM7A,26.973967,2.8994918,2.986692253880928e-160,3.3143742196050437e-159
ASPS,BLCAP,26.964312,0.6721026,3.876267863745847e-160,4.2994286975653174e-159
ASPS,CCDC6,26.957466,0.8402634,4.663310743744617e-160,5.169842772806533e-159
ASPS,USP35,26.95635,2.2392023,4.8056783824296996e-160,5.325051304607602e-159
ASPS,ANKRD28,26.941587,0.6706323,7.15794212417882e-160,7.927632259086829e-159
ASPS,ACIN1,26.940199,0.5998069,7.431191197837635e-160,8.226215342220165e-159
ASPS,TRAPPC8,26.912458,0.7382212,1.5699914027500208e-159,1.7371020904075327e-158
ASPS,TAX1BP1,26.902374,0.6690115,2.0600941427619496e-159,2.2782515323271585e-158
ASPS,UBE2QL1,26.848362,2.4530025,8.814447581706555e-159,9.738298616902604e-158
ASPS,FAS,26.806368,1.7668828,2.7235623235850704e-158,3.007545146824436e-157
ASPS,GRAMD2B,26.80112,1.2201707,3.1355632993975204e-158,3.460806868707268e-157
ASPS,TRPC4AP,26.794466,0.67323554,3.748629353500453e-158,4.13543645100626e-157
ASPS,PIR,26.789762,2.7243242,4.252754914305905e-158,4.6892821825798334e-157
ASPS,PHC3,26.781286,0.65915954,5.3382331944799276e-158,5.883297651408951e-157
ASPS,SEMA6A-AS1,26.768057,1.7364254,7.611225034553573e-158,8.384269182703287e-157
ASPS,VPS37C,26.755949,1.6824721,1.0528416222531504e-157,1.1586406214575624e-156
ASPS,PLIN4,26.754948,4.5156813,1.0815226108646254e-157,1.189622011608426e-156
ASPS,NBPF11,26.74227,0.8196312,1.5188620172700237e-157,1.6698578260215868e-156
ASPS,RICTOR,26.721163,0.7310306,2.6723284193471548e-157,2.936560111201549e-156
ASPS,GBP2,26.699015,2.06531,4.832556274829067e-157,5.30779301927907e-156
ASPS,SEL1L,26.662016,0.7741699,1.2985987914988536e-156,1.4249130084193906e-155
ASPS,PI4KB,26.64531,0.8217978,2.028310486757188e-156,2.224518884233456e-155
ASPS,DLC1,26.644293,0.80946755,2.08407818939226e-156,2.2845679324049107e-155
ASPS,IPPK,26.64125,1.3340884,2.260255546562348e-156,2.4764873941278308e-155
ASPS,ATG7,26.62223,0.73173636,3.7536435294053245e-156,4.110741977093276e-155
ASPS,PCYT1A,26.598331,0.9800469,7.096694605330394e-156,7.768050199073955e-155
ASPS,CLEC2B,26.581837,2.7188687,1.1010107757842702e-155,1.2045817943133204e-154
ASPS,KIAA2026,26.577948,0.70959353,1.2210752635589038e-155,1.3352914871911142e-154
ASPS,MAP3K13,26.554382,0.94822276,2.2857131662318184e-155,2.4982989221003924e-154
ASPS,RPRD1B,26.535755,0.7100487,3.750272132327916e-155,4.095093369143123e-154
ASPS,EXD3,26.527933,1.0914422,4.616645995465186e-155,5.038681771481281e-154
ASPS,LINC00630,26.518785,1.0543001,5.886309642820166e-155,6.421299006867079e-154
ASPS,APPL2,26.494436,0.7539441,1.1234490901978553e-154,1.2243690932156287e-153
ASPS,ARNT,26.491423,0.63370174,1.216960462111772e-154,1.3256386834378232e-153
ASPS,MAP3K9,26.481455,2.1311324,1.585183221490452e-154,1.725909453296692e-153
ASPS,ANK1,26.47749,1.3025398,1.7609481574024595e-154,1.9163509807709067e-153
ASPS,FBXO34,26.473053,0.9074704,1.980788491412523e-154,2.1535094202530838e-153
ASPS,MCPH1,26.446478,0.7388872,4.005586263054356e-154,4.352762860938594e-153
ASPS,RCOR3,26.438454,0.6612291,4.95384844767077e-154,5.380615797047812e-153
ASPS,NADSYN1,26.417269,1.1093025,8.678401300048875e-154,9.421486794867338e-153
ASPS,SLC38A1,26.411833,0.6244171,1.0020277572041753e-153,1.0873015755004806e-152
ASPS,HSD17B4,26.393337,0.8330179,1.634086299651479e-153,1.772175538567168e-152
ASPS,ULK3,26.39332,1.5669115,1.6347640160255236e-153,1.772175538567168e-152
ASPS,ERP44,26.392662,0.7093569,1.6634752142430293e-153,1.8015644704783145e-152
ASPS,FAM193A,26.36678,0.64613146,3.295769252212996e-153,3.5676424733551454e-152
ASPS,CHST12,26.364117,1.5917227,3.5359807151631125e-153,3.825829134362781e-152
ASPS,LDHB,26.35685,0.57171446,4.283715157237741e-153,4.632629005941152e-152
ASPS,CGNL1,26.353445,1.6884876,4.686488178448284e-153,5.065774085301567e-152
ASPS,NRBF2,26.353355,1.7553308,4.697417975031842e-153,5.075150817479194e-152
ASPS,SLC33A1,26.34333,1.1400268,6.119939005784801e-153,6.608888067427397e-152
ASPS,SULT4A1,26.32292,2.0455048,1.0483315908659653e-152,1.1315444821313453e-151
ASPS,RNF175,26.3102,2.817146,1.465866927916718e-152,1.580706047569034e-151
ASPS,SCAF11,26.302738,0.6575256,1.7842842895457303e-152,1.9231474107388247e-151
ASPS,MED12L,26.302343,1.7646929,1.802948344140059e-152,1.942333771415607e-151
ASPS,SMCR8,26.298954,1.6616765,1.9713060760494574e-152,2.1226910641862698e-151
ASPS,AHNAK,26.295237,0.5318502,2.1740144363332946e-152,2.3398467187795693e-151
ASPS,SS18,26.289629,0.6851272,2.519901744772423e-152,2.709526458007806e-151
ASPS,ARHGAP10,26.275427,0.59479946,3.662031781390733e-152,3.9338436868829804e-151
ASPS,VMP1,26.273203,0.6463168,3.882767233469456e-152,4.168973119715177e-151
ASPS,TMEM64,26.249958,1.2577109,7.155483088939703e-152,7.679263086151074e-151
ASPS,ENDOD1,26.23064,2.20236,1.1887928907636821e-151,1.2752041947872577e-150
ASPS,KIAA1549,26.222519,0.8254079,1.4714083842744204e-151,1.5776105616053278e-150
ASPS,CRTAP,26.222206,0.8970981,1.4835978242023208e-151,1.5899223349368205e-150
ASPS,MKNK2,26.20878,1.2631084,2.1105331675234036e-151,2.2585615280605897e-150
ASPS,TOM1,26.208363,1.1712197,2.133802363193676e-151,2.2823774802126273e-150
ASPS,EDEM2,26.195305,1.6072735,3.0056791192157737e-151,3.2119092392189453e-150
ASPS,TTC39B,26.190292,1.0932918,3.428123634824315e-151,3.659863491542752e-150
ASPS,PPARG,26.180296,1.3936068,4.455492066712592e-151,4.7544262191259785e-150
ASPS,CLEC2D,26.156471,1.0359193,8.318850565561249e-151,8.868580387397248e-150
ASPS,ARHGAP5,26.149862,0.6424981,9.890609430561075e-151,1.053921236907088e-149
ASPS,SUMF1,26.148113,0.69932604,1.0354323519303604e-150,1.1028114093796858e-149
ASPS,BMP1,26.136711,1.3114419,1.3956357431037923e-150,1.4857512960525473e-149
ASPS,LRRC58,26.132124,0.99985385,1.5736720851724926e-150,1.6744912660428817e-149
ASPS,PI4KA,26.131344,0.6597142,1.6060888615266984e-150,1.7081772130745911e-149
ASPS,ACAD9,26.11357,1.0464506,2.556984019139377e-150,2.718229822897103e-149
ASPS,CDC42BPB,26.108036,0.6016158,2.955027178059892e-150,3.1398907763096256e-149
ASPS,PDCD10,26.091177,0.95418644,4.591332185523294e-150,4.873959001660459e-149
ASPS,DAB2IP,26.085163,0.8217615,5.372517402950197e-150,5.7005423928993015e-149
ASPS,EXTL3,26.080355,1.1233226,6.091503979162143e-150,6.460381576392273e-149
ASPS,RAD51B,26.061842,0.738058,9.876970782139103e-150,1.0465217864973659e-148
ASPS,MTRES1,26.060778,1.5813046,1.0155554252950385e-149,1.0755329339418749e-148
ASPS,MAMLD1,26.047049,1.088511,1.4530244586913408e-149,1.5381145551669155e-148
ASPS,MED13,26.038157,0.642929,1.8322831045215808e-149,1.9386709575579773e-148
ASPS,KCTD3,26.03565,0.6931598,1.9560606787607434e-149,2.068662855992036e-148
ASPS,SPATA18,25.992905,1.8107964,5.956854545506821e-149,6.29089683466124e-148
ASPS,USF3,25.951313,1.1680658,1.7573107344439193e-148,1.854984900500019e-147
ASPS,DDO,25.944946,4.486466,2.0735119356621096e-148,2.1877349325867688e-147
ASPS,SEC23A,25.9436,0.78990865,2.1473061717212976e-148,2.2645325864380414e-147
ASPS,ZDHHC17,25.922659,0.6852122,3.6990175933661636e-148,3.8954792203418584e-147
ASPS,DLST,25.918402,0.79255927,4.1313261932264687e-148,4.3487135630758503e-147
ASPS,TBCK,25.908463,0.68575263,5.347027622663882e-148,5.623124142432274e-147
ASPS,CREBL2,25.901684,1.533738,6.375126574590671e-148,6.701178120558761e-147
ASPS,FAM120A,25.898611,0.6539226,6.903882987223439e-148,7.253589478406325e-147
ASPS,NECAB3,25.894009,1.3677675,7.779148513995911e-148,8.169376449252356e-147
ASPS,NPAS3,25.892363,0.55950016,8.11858642673741e-148,8.521865090192417e-147
ASPS,FBXW4,25.872494,0.6809052,1.3587723578582832e-147,1.4256024202144832e-146
ASPS,B4GALT4,25.870342,1.7272829,1.4366648875919365e-147,1.5066236391079463e-146
ASPS,PWP1,25.861584,0.96618605,1.80258925587563e-147,1.8894863159516092e-146
ASPS,ZNF493,25.852718,0.8081518,2.26777891884213e-147,2.37488899807083e-146
ASPS,DBI,25.823954,0.928683,4.773799900804245e-147,4.996947291516257e-146
ASPS,MSANTD4,25.820105,1.4696068,5.273248963891556e-147,5.5171765658939785e-146
ASPS,SCYL2,25.799921,0.72213346,8.88513748957462e-147,9.287506697764831e-146
ASPS,NCKAP5L,25.798779,0.97002137,9.151531765591647e-147,9.561523787587745e-146
ASPS,ATP1A2,25.79655,2.3772557,9.693433065989563e-147,1.0123002837591422e-145
ASPS,LDLRAD4,25.774397,0.6059344,1.7177289326141326e-146,1.793018999465726e-145
ASPS,TTLL3,25.772272,0.76299316,1.8145095268383653e-146,1.8931635095733618e-145
ASPS,PAG1,25.770937,1.0465465,1.8781798121609488e-146,1.9586856660186355e-145
ASPS,ZNF337,25.75399,0.7221928,2.9081708150293653e-146,3.0300177866775862e-145
ASPS,IL13RA1,25.752274,1.4096146,3.039863275955907e-146,3.1657622871535256e-145
ASPS,TRRAP,25.743338,0.59650683,3.8275810305477953e-146,3.984260457561431e-145
ASPS,CTNNA1,25.741375,0.6500177,4.026223361349262e-146,4.1890964746724524e-145
ASPS,ENPP4,25.722641,3.1572745,6.524943934113333e-146,6.785760778060101e-145
ASPS,ACO2,25.717314,0.8084582,7.484660238914137e-146,7.780243818788114e-145
ASPS,ACVR1,25.70874,0.7774893,9.333683065249395e-146,9.697808743464342e-145
ASPS,GOLGB1,25.704517,0.5932538,1.0405593754229368e-145,1.0806547643697828e-144
ASPS,ST3GAL4,25.69592,1.0286962,1.2982845664811971e-145,1.3476888454178663e-144
ASPS,RAB12,25.689188,0.8981911,1.5438835535603876e-145,1.601894853521278e-144
ASPS,BORCS7,25.688955,1.4282548,1.5531338383412337e-145,1.6107500936345377e-144
ASPS,BAG1,25.667343,1.4344685,2.707611135476396e-145,2.805469088577177e-144
ASPS,ENO2,25.666853,2.0157237,2.7419506148781163e-145,2.839742226775518e-144
ASPS,RETREG1,25.663475,1.4391545,2.9906939339357746e-145,3.0959322439385744e-144
ASPS,CAPRIN2,25.658903,0.86561763,3.363563320618208e-145,3.48032149565576e-144
ASPS,WWTR1,25.625729,0.6251845,7.884742787112325e-145,8.150947929442483e-144
ASPS,KANK2,25.622524,0.76987505,8.560557937087819e-145,8.84551682158684e-144
ASPS,DENND1A,25.618979,0.6293318,9.375974122674183e-145,9.683629996823428e-144
ASPS,DLGAP1-AS1,25.604933,1.2059077,1.3442792974136701e-144,1.3877525499217729e-143
ASPS,SYNRG,25.603264,0.6617165,1.4030424689587463e-144,1.4477519836733877e-143
ASPS,GEM,25.59422,1.747748,1.7692587070688725e-144,1.8248014299993113e-143
ASPS,PLEKHG3,25.58081,1.5410594,2.4946322040600132e-144,2.5717681059262753e-143
ASPS,DYRK1A,25.570187,0.65518844,3.274946335630691e-144,3.3731197841358677e-143
ASPS,ANKRD39,25.556883,1.4667269,4.603862933426609e-144,4.737537051521071e-143
ASPS,ZBTB4,25.550596,0.9728436,5.407587779572256e-144,5.556975478505645e-143
ASPS,IDE,25.520723,0.8046517,1.1609159631498735e-143,1.1918984375313826e-142
ASPS,BIN3,25.513025,1.0995096,1.413281980133534e-143,1.4503379372049788e-142
ASPS,WDR20,25.504332,0.72720045,1.764761281307074e-143,1.810207503911381e-142
ASPS,HSPB1,25.504025,0.60041904,1.7787080336184632e-143,1.8236822002999323e-142
ASPS,BCL6,25.497637,0.9679909,2.093831392411117e-143,2.1457957871681324e-142
ASPS,SEPHS2,25.490755,1.9723041,2.4960756407224337e-143,2.556858547767791e-142
ASPS,NUDCD3,25.489637,0.67657495,2.5683952391160425e-143,2.629742259158623e-142
ASPS,ZMAT1,25.489029,0.92468,2.6085974308512113e-143,2.669690094647863e-142
ASPS,KCNG3,25.487207,2.103608,2.732757586956078e-143,2.7954867952021156e-142
ASPS,INO80,25.483335,0.6982154,3.0166383034800454e-143,3.0844818273429543e-142
ASPS,KAZN,25.478504,0.3184162,3.4124271438883874e-143,3.4875873239422416e-142
ASPS,STK17A,25.473085,1.3104807,3.9183346987141423e-143,4.002819899889322e-142
ASPS,PLEKHM3,25.463911,0.8261875,4.951416462965265e-143,5.05588146547338e-142
ASPS,HSBP1L1,25.459791,2.4096942,5.500061503735043e-143,5.613554836351798e-142
ASPS,BAZ2A,25.416231,0.62378454,1.6685233290886063e-142,1.7014099465853686e-141
ASPS,MEF2D,25.411158,0.8581832,1.8985251320972702e-142,1.9350683015330193e-141
ASPS,SNX21,25.405634,1.6641812,2.1851138284391918e-142,2.2251577696390956e-141
ASPS,OTUD7B,25.399782,0.68157953,2.5358541384762013e-142,2.5811577289193537e-141
ASPS,TMOD3,25.398998,0.7629491,2.5869879017282786e-142,2.6320145898912705e-141
ASPS,RAD51D,25.384987,1.5333287,3.694342271464825e-142,3.7569440948628954e-141
ASPS,SH2B3,25.382416,1.1385698,3.943853416619005e-142,4.008871776920086e-141
ASPS,POFUT2,25.37871,1.0270303,4.333610158698519e-142,4.403065310226193e-141
ASPS,PCK2,25.361052,2.651812,6.787228016640045e-142,6.889786491406596e-141
ASPS,COX17,25.35792,1.4919156,7.349473267994675e-142,7.457163926790809e-141
ASPS,RABGEF1,25.357735,0.66987705,7.3838389163417e-142,7.488656818939611e-141
ASPS,CHP1,25.340166,1.3341169,1.1534494715351131e-141,1.1692964124728704e-140
ASPS,CHRD,25.337204,1.720439,1.2434736239368429e-141,1.2594227680782471e-140
ASPS,MBD2,25.335556,0.7306974,1.2966080141572217e-141,1.3126479243638451e-140
ASPS,AK9,25.335327,1.2989595,1.3041276726476801e-141,1.319666963711153e-140
ASPS,IKBKB,25.326048,0.7317786,1.6503289754556004e-141,1.6692428580956534e-140
ASPS,PRKD1,25.31058,0.71853244,2.442986260561026e-141,2.46987447412066e-140
ASPS,GSN,25.299559,0.828671,3.230193664844491e-141,3.2642796779221043e-140
ASPS,CNTN6,25.29387,2.2789395,3.7309332529549306e-141,3.7686109900247177e-140
ASPS,PBXIP1,25.287237,1.2039576,4.413584902265955e-141,4.456156492844115e-140
ASPS,CAMKK1,25.282291,1.9584627,5.002362828755679e-141,5.048348675387738e-140
ASPS,SLC22A18,25.266754,3.022545,7.412953436515762e-141,7.477746171617536e-140
ASPS,ZFX,25.266336,0.7129956,7.491676469710219e-141,7.553771458370452e-140
ASPS,LTBR,25.265713,1.187371,7.610973641180685e-141,7.670620770030063e-140
ASPS,EDA2R,25.261274,1.6340524,8.515274980906347e-141,8.578167566933632e-140
ASPS,KCNK9,25.249388,3.257037,1.1502562810442994e-140,1.1582334498837563e-139
ASPS,PLCG2,25.245033,2.3246312,1.2841021371475502e-140,1.2924292753356715e-139
ASPS,ACSF2,25.234375,2.0376344,1.681189798284077e-140,1.6913355570131047e-139
ASPS,GEMIN4,25.222681,2.2523248,2.2591533277401745e-140,2.271771476353558e-139
ASPS,GHITM,25.2025,1.5768645,3.7607203705249603e-140,3.7800362634508365e-139
ASPS,PHYHD1,25.195997,2.0269568,4.431432881639946e-140,4.452205223272633e-139
ASPS,SLC66A2,25.182177,0.97063565,6.280357039576336e-140,6.3069805968614654e-139
ASPS,ATE1,25.170122,0.67781377,8.511113255327693e-140,8.54338107989071e-139
ASPS,SLC25A53,25.15023,1.3124834,1.4050134115376313e-139,1.409711405557485e-138
ASPS,TBC1D2,25.145884,2.6429768,1.5675820648544569e-139,1.5721227437410676e-138
ASPS,KDM5A,25.140999,0.6389452,1.772774088440388e-139,1.7771171875434716e-138
ASPS,CHN1,25.120966,0.78367484,2.935239539885666e-139,2.939811564091096e-138
ASPS,XAF1,25.094769,1.8054426,5.6722148819538834e-139,5.675998039945404e-138
ASPS,GPRC5B,25.068499,1.895619,1.0974105994277869e-138,1.097654468449882e-137
ASPS,CMC1,25.05785,0.77720964,1.4336947787468843e-138,1.4333763214437418e-137
ASPS,LMBR1L,25.057344,1.025244,1.451982127706264e-138,1.4510149992908292e-137
ASPS,CNTLN,25.049036,0.6216581,1.7885997138940616e-138,1.7866150271276457e-137
ASPS,STK3,25.038815,0.6112547,2.311337622066132e-138,2.3077485884914953e-137
ASPS,ALOX12-AS1,25.035957,0.6849153,2.483046288374797e-138,2.478091207089792e-137
ASPS,ETV6,25.035362,0.70379925,2.5203361866462873e-138,2.5141917500210416e-137
ASPS,ACADL,25.033497,1.7055656,2.641077222996385e-138,2.6334711078216057e-137
ASPS,SIK2,25.030977,0.71063113,2.8131905309248383e-138,2.803846452544884e-137
ASPS,BLOC1S2,25.027813,1.7557523,3.045547498094697e-138,3.0340879346888515e-137
ASPS,SERF2,25.023499,0.48149076,3.3932294871159985e-138,3.3789659118382985e-137
ASPS,MDM4,25.011662,0.57984054,4.564943638164442e-138,4.541735480852819e-137
ASPS,PDHA1,25.002525,0.9309758,5.738728379077732e-138,5.707029702657726e-137
ASPS,MYO19,24.998346,0.71885055,6.371878071154157e-138,6.333883215164501e-137
ASPS,ZFP91,24.986853,0.7278553,8.496107372945281e-138,8.441717281595299e-137
ASPS,EP400,24.973366,0.5718416,1.190614993484023e-137,1.182470892690112e-136
ASPS,DLEU2,24.918472,0.59283525,4.692741903939355e-137,4.656532475668218e-136
ASPS,FBXO30,24.914812,1.211181,5.141521161725568e-137,5.09960042946822e-136
ASPS,WDR19,24.883766,0.7896764,1.1152273912201998e-136,1.1056472440268984e-135
ASPS,AKAP10,24.883188,0.6295249,1.1313910497200098e-136,1.121178140640635e-135
ASPS,RAB35,24.85139,1.390012,2.4978714321902686e-136,2.4731454721267925e-135
ASPS,EPHX2,24.84462,2.01402,2.956351208174208e-136,2.9257996455567524e-135
ASPS,AK3,24.826328,0.56258434,4.659778990061396e-136,4.6095967547838116e-135
ASPS,MYH14,24.819569,2.0987248,5.512698258447069e-136,5.448540812751484e-135
ASPS,AKAP12,24.817186,1.0311567,5.8490163712588965e-136,5.778407086706825e-135
ASPS,PPP2R5C,24.81513,0.6658453,6.1555217542474856e-136,6.078543970133377e-135
ASPS,MMP24OS,24.81481,0.9895692,6.204761486946878e-136,6.12448058174296e-135
ASPS,LINC01224,24.790424,4.4637737,1.1371900958015918e-135,1.1210014501101545e-134
ASPS,FBXL20,24.782183,0.63559437,1.395399560029233e-135,1.3749328852214488e-134
ASPS,ACYP1,24.770935,1.007617,1.8446781141903196e-135,1.8168263002123915e-134
ASPS,ZFYVE1,24.768785,1.2005622,1.9457206871806766e-135,1.9155049897200844e-134
ASPS,CERS4,24.755571,0.84947264,2.7003659214240105e-135,2.657268695305962e-134
ASPS,CLNK,24.754353,7.0969677,2.783087909238017e-135,2.73747348764867e-134
ASPS,TAGLN2,24.750227,1.5274111,3.0828690369670704e-135,3.0310164996480524e-134
[truncated: 245,556+ more rows]

## Sheet: Sarcoma_markers
Sarcoma entity	Marker genes	Number of markers
Ewing sarcoma	RBM11, LOXHD1, MAPT	3
Alveolar rhabdomyosarcoma (aRMS)	MYO18B, TTN, SPATS2L	3
Clear cell sarcoma	COL4A2, PCP4, MDGA2	3
Desmoplastic small round cell tumor (DSRCT)	CACNA2D2	1
Alveolar soft part sarcoma (ASPS)	GPNMB, IGFN1, PSAP, UPP1	4
Epithelioid sarcoma	STEAP1B, MME, SORBS2	3
Synovial sarcoma	TLE1, CACNA1C, SLIT3	3
Myoepithelial carcinoma	MUCL1, ERBB4	2
Embryonal rhabdomyosarcoma (eRMS)	IGF2, ZFHX4, CNN3	3
Osteosarcoma	RUNX2, COL11A1	2
Undifferentiated sarcoma	LAMC1, SFRP1	2
Curated entity-specific sarcoma marker panel (final list, 02 Nov 2025) used to support malignant-cell identification alongside CNV inference. General/lineage markers evaluated separately are not listed here.
