# Supplementary material
Source: Research Square preprint supplement (doi:10.21203/rs.3.rs-10374394/v1)
Supplement: Supplementary file 3 [file 612a1c3ddfcb119bdceef161.xlsx]

## Sheet: Celltype pct per sample
sample	B cells	CD4+ T	CD8+ T	DCs	Ductal cells	Endothelial cells	Fibroblasts	MAIT cells	Macrophages	Mast cells	Monocytes	NK cells	Osteoclasts	Pericytes	Plasma cells	Pulmonary ATII cells	T proliferative	malignant	pDCs	γδ T cells
CIPPST_EWS_001_001	0	0	0	0	0	0.03	0.13	0	0	0	0	0	0	0	0	0	0	99.84	0	0
CIPPST_EWS_001_002	0	0	0	0	0	0.03	0.06	0	0	0	0	0	0	0.09	0	0	0	99.82	0	0
CIPPST_EWS_002_001	0	0.05	0.01	0	0	0.09	0.21	0	0.11	0	0	0	0	0.04	0	0	0	99.49	0	0
CIPPST_EWS_002_002	0.01	0.14	0.05	0.01	0	0.52	0.22	0	0.29	0.02	0.01	0.01	0.01	0.25	0	0.01	0	98.46	0	0
CIPPST_EWS_002_003	0	0.23	0.1	0.01	0	0.82	0.7	0	0.52	0	0	0.01	0	0.44	0	0.02	0.01	97.14	0	0
CIPPST_EWS_003_002	0.18	0.88	0.21	0.33	0	0.8	1.08	0.02	1.77	0	0.03	0.26	0.03	0.67	0.05	0.01	0.11	93.47	0.02	0.09
CIPPST_EWS_004_001	0.02	1.22	0.33	0.24	0	1.23	1.31	0.04	1.89	0	0.04	0.08	0.01	1.07	0.08	0	0.01	91.76	0.1	0.59
CIPPST_EWS_004_002	0	0.48	0.32	0.16	0	4.04	2.99	0	1.53	0	0.08	0	0	1.45	0	0	0	88.85	0.08	0
CIPPST_EWS_004_003	0.03	1.6	0.78	0	0	0.41	0.09	0.07	0.53	0	0.04	0.05	0	0.12	0.01	0	0.05	95.79	0	0.43
CIPPST_EWS_005_001	0.03	0.58	0.06	0.11	0	0.9	3.66	0	0.8	0	0.02	0.09	0.02	0.47	0	1.54	0	91.7	0.02	0.01
CIPPST_EWS_005_002	0	0.06	0.03	0.03	0	0.65	0.93	0	0.88	0	0.01	0.01	0	0.31	0	0	0	97.05	0.01	0.02
CIPPST_EWS_006_001	0.02	0.65	0.1	0.13	0	2.81	3.51	0.08	2.18	0.04	0.12	0.08	0.01	1	0.02	0.91	0.01	88.31	0.01	0.02
CIPPST_EWS_006_002	0.02	0.29	0.08	0.02	0	0.84	0.93	0	0.7	0.01	0.03	0.02	0.01	0.4	0	0.14	0	96.47	0	0
CIPPST_EWS_006_003	0.03	0.49	0.05	0.24	0	1.71	3.69	0.01	4.77	0	0.09	0.06	0.03	0.88	0	0	0.01	87.94	0	0
CIPPST_EWS_007_001	0.01	0.7	0.18	0.21	0	3.2	2.2	0.05	2.02	0	0.07	0.12	0.01	1.72	0	0	0.07	89.38	0.01	0.07
CIPPST_EWS_007_002	0	0.2	0.09	0.06	0	2.99	1.65	0.01	1.06	0	0.11	0.03	0.01	0.85	0	0	0	92.93	0	0.02
CIPPST_EWS_008_001	0.04	0.19	0.04	0.08	0	1.07	2.39	0	1.05	0	0.02	0.02	0	1.72	0	0	0	93.37	0	0
CIPPST_EWS_009_001	0.04	0.16	0.07	0.09	0	0.78	2.86	0.01	1.45	0	0.06	0.03	0	0.46	0.01	0	0	93.91	0	0.07
CIPPST_EWS_009_002	0.16	0.08	0.08	1.01	0	6.39	2.49	0	13.41	0.86	0.08	0.62	0.08	1.48	0	0.08	0.08	73.11	0	0
CIPPST_EWS_010_001	0	0.04	0	0.04	0	0.7	1.65	0	1.35	0	0	0.04	0	0.39	0	0	0	95.78	0	0
CIPPST_EWS_010_002	0	0	0	0	0	0	0	0	0.1	0	0.01	0	0.01	0	0	0	0	99.88	0	0
CIPPST_EWS_016_001	0	0.5	0.12	0.05	0	2.46	3.88	0.02	2.15	0	0.03	0.1	0	1.38	0.02	0	0.01	89.27	0.01	0.01
CIPPST_EWS_017_001	0	0.31	0.12	0.02	0	1.23	1.78	0	2.27	0	0	0	0	0.12	0.05	0.02	0	94.08	0	0
CIPPST_OST_101_001	0	0.15	0.04	0.18	0	2.5	0.88	0.04	2.06	0	0.07	0.15	0.04	1.36	0	0	0	92.53	0	0
CIPPST_OST_101_002	0.01	0.31	0.01	0.24	0	2.67	0.19	0	2.14	0.02	0.08	0.09	0.03	0.16	0	0.01	0.05	93.94	0.03	0.01
CIPPST_OST_102_001	0.21	0.93	0.27	0.03	0	12.67	1.2	0.03	3.33	0.12	0.21	0.03	1.02	1.8	0.21	0	0.03	77.87	0	0.03
CIPPST_OST_102_002	0	0.4	0.07	0.22	0	2.24	0.73	0.02	4.86	0.01	0.02	0.03	0.21	0.4	0	0	0.05	90.69	0	0.04
CIPPST_OST_102_003	0.02	0.51	0.2	0.82	0	4.63	1.31	0	18.49	0	0.2	0.02	0.27	1.54	0	0	0.02	71.99	0	0
CIPPST_OST_103_002	0.34	6.04	1.53	3.21	0	4.36	5.05	1.07	21.95	0.46	1.22	0.88	0	2.72	0.19	0	0.11	49.79	0.65	0.42
CIPPST_OST_104_001	0	0	0	0	0	8.86	11.53	0	10.93	0	0	0	3.96	0.52	0	18.16	0	46.04	0	0
CIPPST_OST_104_002	0.13	1.84	0.24	1.69	0	10.44	12.72	0.15	35.22	0.04	1.07	0.21	1.86	1.26	0.34	17.37	0	15.23	0.15	0.04
CIPPST_OST_105_001	0	0	0	0	0	4.63	2.11	0	3.47	0	0	0	0.88	2.31	0	0.95	0	85.64	0	0
CIPPST_OST_106_001	0.06	1.85	0.55	0.76	0	10.17	3.98	0.31	14.53	0.29	0.57	0.48	3.72	1.65	0.18	8.84	0.05	51.73	0.11	0.15
CIPPST_OST_107_001	0	0.24	0.08	0.05	0	1.26	0.89	0	2.1	0	0	0	0.13	0.56	0	0	0	94.68	0	0
CIPPST_OST_108_001	0	0	0.05	0.05	0	2.15	1.31	0	1.4	0.19	0	0.05	0	0.42	0	0	0	94.39	0	0
CIPPST_OST_109_001	0	0.1	0.2	0.03	0	2.78	1.91	0.03	6.29	0	0	0.03	0	1.31	0	0	0	87.31	0	0
CIPPST_STS_201_001	2.3	5.83	1.72	0.63	0	1.21	6.16	0.41	4.5	0.01	0.08	0.34	0.03	0.62	0.24	0.02	0.06	75.44	0.06	0.32
CIPPST_STS_201_002	0	0.63	0.5	0.15	0	3.33	8.35	0.05	6.45	0.03	0.08	0	0.05	1.48	0.03	0.03	0.03	78.74	0.03	0.08
CIPPST_STS_202_001	0	0	0	0	0	0	0	0	0	0	0	0	0	0	0	0	0	100	0	0
CIPPST_STS_202_002	0	0	0	0	0	0	0	0	0	0	0	0	0	0	0	0	0	100	0	0
CIPPST_STS_203_001	0	0.19	0.14	0.32	0	1.67	0.51	0	2.92	0	0.19	0.05	0	0.19	0	0	0	93.56	0.05	0.23
CIPPST_STS_203_002	0	0.83	0.59	0.66	0	0.64	1.22	0.07	6.17	0.08	0.23	0.07	0.07	0.21	0	0	0.12	88.51	0.15	0.38
CIPPST_STS_204_001	0.01	0.1	0.02	0.16	0	0.92	0.08	0	1.05	0.49	0.11	0.05	0.01	0	0	0.01	0.01	96.79	0.2	0
CIPPST_STS_204_002	0.09	0.33	0.04	0.03	0	0.69	0.08	0.03	0.44	1.19	0.19	0.06	0.02	0.17	0	0	0	96.64	0	0
CIPPST_STS_205_001	0	1.65	0.59	0.55	0	0.34	0.59	0.05	4	0.1	0.12	0.12	0	0.19	0.03	0.01	0.18	91.23	0.07	0.2
CIPPST_STS_206_001	0.02	0.06	0.01	0.13	0	2.01	0.95	0	1.48	0	0.02	0.02	0	0.74	0	0	0	94.53	0.02	0
CIPPST_STS_207_001	0	0.05	0.19	0.07	0	1.3	1.68	0	1.47	0	0.02	0	0.5	0.53	0.02	0	0	94.17	0	0
CIPPST_STS_207_002	0	0.12	0.12	0.19	0	0.69	3.36	0	2.2	0.01	0.04	0	1.18	0.45	0	0	0.01	91.52	0.1	0
CIPPST_STS_208_001	0	0.21	0.06	0.36	0	2.18	10.6	0.03	4.08	0	0.09	0.09	0.94	1.12	0	0	0.03	80.21	0	0
CIPPST_STS_208_002	0.33	4.91	1.59	0.53	0	8.37	7.44	0.13	15.87	0	0.73	0.13	0.13	4.18	0.07	0.27	0.07	54.85	0	0.4
CIPPST_STS_209_001	0.02	0.81	0.28	1.38	0	2.45	1.15	0.32	26.49	0	0.63	0.14	0	1.24	0	0	0.12	64.88	0.02	0.08
CIPPST_STS_210_001	0.02	3.74	3.32	0.44	0	4.64	5.47	0.17	4.03	0.02	0.1	0.16	0.28	1.01	0.02	0	0.39	76.06	0.01	0.12
CIPPST_STS_211_001	0.12	1.3	0.34	0.38	0	18.1	8.34	0.13	7.77	0.36	0.15	0.28	0.15	12.87	0.02	0.12	0.04	48.88	0.02	0.61
CIPPST_STS_211_002	0.13	1.59	1.04	1.75	0	9.4	43.85	0.73	15.01	0.65	0.37	0.37	0.03	5.32	0.08	0.03	0.05	19.06	0.1	0.44
CIPPST_STS_212_001	0	0.09	0.03	0.07	0	1.31	4.35	0	3.1	0	0.01	0.01	0.05	0.46	0	0.02	0.01	90.47	0	0.01
CIPPST_STS_212_002	0	0.44	0.27	0.3	0	1.82	5.07	0.05	3.71	0.02	0.06	0.01	0.04	1.3	0	0.01	0.02	86.84	0.01	0.03
CIPPST_STS_213_001	0	0.34	0	0.34	0	3.93	11.65	0	4.94	0.15	0.11	0.15	0.07	2.58	0	0.04	0	75.54	0.07	0.07
CIPPST_STS_213_002	0	0.04	0.01	0.05	0	0.5	2.05	0	0.93	0.01	0.01	0.01	0	0.26	0	0	0.01	96.13	0	0
CIPPST_STS_214_001	0	0.06	0.02	0.12	0	3.72	9.17	0	3.87	0	0.42	0.09	0.05	3.01	0	0.02	0.02	79.45	0	0
CIPPST_STS_214_002	0.02	0.1	0.03	0.29	0	1.49	0.55	0	5.03	0.02	0.19	0.03	0.11	1.61	0.05	0	0	90.38	0.11	0.01
CIPPST_STS_215_001	0	0.12	0.04	0.24	0	2.25	17.86	0.03	2.65	0.03	0	0.03	0.04	1.98	0	0.03	0.01	74.64	0.01	0.03
CIPPST_STS_216_001	0	0.05	0.11	0.03	0	2.87	0.53	0	2.32	0	0.03	0	0	1.34	0.03	0	0	92.7	0	0
CIPPST_STS_217_001	0.21	1.05	0.74	0.63	0	4.27	7.49	0.37	6.22	0.58	1.37	0.42	0.26	4.22	0.05	0.05	0	71.94	0	0.11
CIPPST_STS_219_001	0	0	0	0	0	0.36	1.95	0	0.64	0	0	0	0	0.38	0	0	0	96.68	0	0
CIPPST_STS_220_001	8.09	12.87	3.42	0.29	0	0.42	3.25	0	1.09	0	0.01	0.13	0	0	0.09	0	0.14	69.85	0	0.35
CIPPST_STS_222_001	0	0	0	0.21	0	2.92	3.13	0	2.28	0.07	0	0	0	0.85	0	0	0	90.53	0	0
CIPPST_STS_223_001	0.02	0.44	0.2	0.39	0	4.63	5.11	0.16	2.26	0	0.14	0.19	0.01	2.85	0.05	0.01	0.04	83.49	0	0.03
CIPPST_STS_224_001	0.04	0.38	0.38	0.32	0	0.75	0.44	0.02	2.63	0	0.05	0.12	0.04	0.39	0.01	0	0.02	94.36	0	0.05
CIPPST_STS_225_001	0.02	1.12	0.35	0.35	0	1.52	1.02	0.25	5.64	0.4	0.97	0.17	0.1	0.55	0.02	0.02	0.05	87.37	0.02	0.05
CIPPST_STS_226_001	0	0.01	0	0.01	0	0.24	1.94	0	0.74	0.01	0	0	0.01	0.32	0	0	0	96.73	0	0
CIPPST_STS_227_001	0.03	0.36	0.21	0.08	0	0.5	0.2	0	1.01	0	0	0.06	0	0.34	0.01	0	0.04	97.09	0.01	0.06
CIPPST_STS_228_001	0	0	0	0	0	0.79	1.71	0	1.07	0	0	0	0	0.34	0	0	0	96.09	0	0
CIPPST_STS_229_001	0	0.52	0.12	0.46	0	0.48	0.91	0	2.4	0.01	0.53	0.03	0	0.22	0.16	0	0.01	94.06	0.07	0
CIPPST_STS_230_001	0.01	0.08	0.01	0	0	0.31	1.5	0	0.93	0	0.01	0.01	0.02	0.74	0	0.01	0.01	96.32	0	0.04
CIPPST_STS_231_001	0	0.03	0.01	0	0	0.51	1.34	0	0.83	0	0	0	0.01	0.27	0	0.01	0	97	0.01	0
CIPPST_STS_232_001	0	0.35	0.09	0.13	0	0.63	3.51	0.03	2.43	0	0.02	0.01	0.01	0.47	0	0	0.01	92.31	0	0.01
CIPPST_STS_233_001	0	0.03	0.01	0.07	0	2.31	0.4	0	0.46	0.01	0.03	0.01	0	0.28	0	0	0	96.32	0.07	0
CIPPST_STS_234_001	0.04	0.53	0.11	0.04	0	1.02	2.18	0.12	1.37	0.02	0.22	0.04	0	0.65	0	0.03	0	93.61	0.02	0
CIPPST_STS_235_001	0	0.01	0.01	0.01	0	0.01	0.07	0	0.06	0	0	0	0	0.01	0	0	0	99.81	0	0
CIPPST_STS_235_002	0	0.17	0	0.05	0	0.81	1.04	0.02	0.33	0	0.02	0.02	0.05	0.31	0	0.02	0	97.13	0.02	0
CIPPST_STS_239_001	0	0.4	0.12	0.19	0	1.79	9.48	0.1	5.85	0.02	0.05	0.04	0.11	1.33	0.02	0.01	0	80.48	0	0.02
CIPPST_STS_240_001	0.41	0.83	0.35	1.59	0	13.97	16.8	0	12.52	1.66	0.28	0.14	0	3.67	0	0.07	0.07	47.44	0	0.21
CIPPST_STS_242_001	0	0.08	0	0	0	0.15	5.2	0	1.56	0	0	0	0	0.28	0	0	0	92.73	0	0
CIPPST_STS_243_001	4.14	4.08	0.49	0.2	0	1.44	4.3	0.2	1.36	0	0.06	0.25	0.01	0.79	0.13	0.02	0.02	82.33	0.05	0.13
CIPPST_STS_243_002	0.02	1.92	0.44	0.74	0.04	3.06	7.76	0.17	3.52	0.49	0.19	0.17	0.02	1.97	0.14	0.72	0.11	77.95	0.31	0.25
CIPPST_STS_244_001	0	0.02	0	0.01	0	0.48	1.3	0	1.51	0	0	0	0	0.25	0	0	0	96.41	0	0
CIPPST_STS_246_001	0.57	10.23	7.96	1.37	0	11.24	6.62	0.46	9.56	0.23	0.12	0.48	0.14	9.15	1.99	0.06	0.78	35.99	0.21	2.85
CIPPST_STS_247_001	0.01	0.04	0.01	0.04	0	2.25	0.39	0.01	0.87	0.04	0.04	0.07	0	0.39	0	0	0	95.83	0.01	0.01
CIPPST_STS_248_001	2.28	4.86	0.96	0.11	0	0.29	3.93	0	1.69	0	0	0.06	0.01	0.15	0.11	0	0.04	85.5	0.02	0
