# Supplementary material
Source: Research Square preprint supplement (doi:10.21203/rs.3.rs-10374394/v1)
Supplement: Supplementary file 4 [file 878d9cc368e36466cbbbb537.xlsx]

## Sheet: qc_summary_all_samples
sample,folder,Estimated Number of Cells,Mean Reads per Cell,Median Genes per Cell,Number of Reads,Valid Barcodes,Sequencing Saturation,Q30 Bases in Barcode,Q30 Bases in RNA Read,Q30 Bases in UMI,Reads Mapped to Genome,Reads Mapped Confidently to Genome,Reads Mapped Confidently to Intergenic Regions,Reads Mapped Confidently to Intronic Regions,Reads Mapped Confidently to Exonic Regions,Reads Mappe…
CIPPST_EWS_001_001,03_Ewing,4941.0,41755.0,961.0,206311879.0,88.9,69.1,95.5,90.4,95.1,87.9,74.6,6.4,33.5,34.7,59.5,7.9,71.3,28156.0,1406.0
CIPPST_EWS_001_002,03_Ewing,4687.0,60829.0,736.0,285105611.0,88.2,75.1,95.6,92.9,95.3,91.7,76.4,5.6,29.3,41.4,65.0,4.9,60.8,27011.0,1052.0
CIPPST_EWS_002_001,03_Ewing,11486.0,20348.0,512.0,233717818.0,85.0,37.7,93.9,79.3,93.6,39.8,30.0,1.5,5.7,22.8,26.0,2.3,33.5,27077.0,694.0
CIPPST_EWS_002_002,03_Ewing,16227.0,13887.0,1521.0,225337202.0,88.1,22.7,95.5,88.5,95.1,77.4,67.5,5.5,31.3,30.7,53.5,7.8,76.1,30078.0,2430.0
CIPPST_EWS_002_003,03_Ewing,28136.0,8557.0,955.0,240754042.0,89.1,20.3,95.7,89.6,95.1,82.1,70.8,4.6,26.4,39.8,58.6,6.9,70.4,29817.0,1386.0
CIPPST_EWS_003_001,03_Ewing,967.0,235968.0,791.0,228180966.0,78.5,76.0,94.7,88.1,94.7,79.1,11.8,2.4,3.1,6.3,8.3,1.0,37.2,20723.0,1013.0
CIPPST_EWS_003_002,03_Ewing,11672.0,22051.0,1618.0,257384235.0,89.4,35.9,95.6,92.1,95.3,89.7,76.2,6.3,30.9,39.1,63.7,5.4,63.9,30696.0,2711.0
CIPPST_EWS_004_001,03_Ewing,17846.0,13448.0,1913.0,239992199.0,90.7,24.2,95.9,90.6,95.4,85.1,75.0,4.7,29.2,41.0,65.0,4.4,60.3,29394.0,3360.0
CIPPST_EWS_004_002,03_Ewing,1509.0,175827.0,2072.0,265322484.0,91.7,80.2,95.5,88.2,95.0,75.4,52.4,9.8,19.1,23.6,38.2,4.0,87.7,26792.0,4326.0
CIPPST_EWS_004_003,03_Ewing,13601.0,20958.0,1854.0,285053293.0,90.1,30.6,95.7,91.8,95.1,88.7,76.5,5.3,22.2,48.9,66.0,4.4,49.9,28806.0,3070.0
CIPPST_EWS_005_001,03_Ewing,11692.0,19220.0,1285.0,224720125.0,92.3,33.2,95.3,85.4,95.0,66.7,44.1,3.1,22.7,18.3,38.2,2.2,46.6,27739.0,1887.0
CIPPST_EWS_005_002,03_Ewing,14134.0,15790.0,1908.0,223168845.0,90.5,27.2,95.8,91.6,95.5,86.5,77.1,5.4,31.5,40.1,65.9,4.6,59.9,29466.0,3416.0
CIPPST_EWS_006_001,03_Ewing,14378.0,18035.0,2053.0,259305088.0,90.6,23.5,95.7,90.5,95.3,81.7,68.9,5.4,35.7,27.8,57.9,4.7,64.7,30174.0,3686.0
CIPPST_EWS_006_002,03_Ewing,20216.0,13211.0,2064.0,267073690.0,90.3,21.5,95.9,91.0,95.3,87.3,79.7,5.9,27.6,46.2,67.8,5.2,62.0,30315.0,3510.0
CIPPST_EWS_006_003,03_Ewing,11205.0,26213.0,2319.0,293720227.0,91.2,31.3,95.9,90.3,95.5,83.8,69.0,5.9,37.9,25.2,58.3,3.9,63.8,30469.0,4553.0
CIPPST_EWS_007_001,03_Ewing,15145.0,15643.0,2104.0,236905939.0,90.5,27.7,95.8,89.8,95.3,82.7,73.1,6.0,34.9,32.2,61.6,4.4,65.1,29778.0,3945.0
CIPPST_EWS_007_002,03_Ewing,16117.0,14828.0,2060.0,238982321.0,89.4,26.0,95.8,91.0,95.3,85.7,75.3,6.6,31.3,37.4,62.2,5.6,71.7,30141.0,3591.0
CIPPST_EWS_008_001,03_Ewing,4969.0,50091.0,1900.0,248901021.0,92.0,74.5,95.1,89.1,94.7,81.3,74.0,6.7,43.5,23.8,59.9,6.4,80.4,28491.0,4254.0
CIPPST_EWS_009_001,03_Ewing,7227.0,32098.0,3305.0,231973431.0,91.0,29.1,95.6,88.1,95.3,77.0,66.4,7.0,30.2,29.1,52.4,6.2,72.4,31113.0,6784.0
CIPPST_EWS_009_002,03_Ewing,1445.0,165396.0,2613.0,238997172.0,87.6,86.3,95.1,88.0,94.5,73.0,64.4,4.2,30.5,29.7,53.2,6.3,77.1,27763.0,6112.0
CIPPST_EWS_009_003,03_Ewing,78.0,2979312.0,898.0,232386334.0,85.3,99.2,95.2,81.2,95.0,50.0,21.9,2.4,7.8,11.6,16.6,2.7,79.6,15304.0,1377.0
CIPPST_EWS_010_001,03_Ewing,2559.0,96370.0,2690.0,246611787.0,88.3,76.6,95.5,90.6,95.2,83.0,73.3,7.2,30.7,35.4,57.7,7.6,71.7,28918.0,5424.0
CIPPST_EWS_010_002,03_Ewing,14865.0,15941.0,573.0,236960023.0,90.8,63.1,95.7,89.9,95.4,81.3,67.2,5.5,35.6,26.1,55.8,5.0,94.6,29550.0,717.0
CIPPST_EWS_011_001,03_Ewing,185.0,1360908.0,618.0,251767991.0,88.9,97.6,94.9,80.2,94.8,41.5,14.8,3.3,4.4,7.1,10.3,1.1,57.5,16857.0,816.0
CIPPST_EWS_016_001,03_Ewing,11362.0,21166.0,2110.0,240483616.0,91.6,22.9,95.8,90.7,95.5,82.7,67.3,5.0,33.2,29.0,57.2,4.0,54.9,29459.0,3807.0
CIPPST_EWS_017_001,03_Ewing,4327.0,59040.0,706.0,255467408.0,83.5,45.6,95.0,85.0,94.7,61.9,11.2,2.9,2.1,6.2,7.6,0.6,48.9,24862.0,858.0
CIPPST_OST_101_001,02_Osteos,2779.0,94154.0,2086.0,261652767.0,88.4,70.8,95.8,90.1,95.3,86.4,68.7,5.6,22.8,40.3,57.7,4.8,53.4,27943.0,4117.0
CIPPST_OST_101_002,02_Osteos,9438.0,25684.0,1934.0,242401826.0,89.7,44.6,95.8,90.1,95.4,81.5,70.3,5.4,35.0,29.8,59.4,4.9,74.4,29681.0,4016.0
CIPPST_OST_102_001,02_Osteos,3387.0,68573.0,1555.0,232255483.0,89.6,46.2,95.0,83.9,94.5,55.7,24.4,3.1,11.9,9.5,19.7,1.5,67.2,27259.0,2771.0
CIPPST_OST_102_002,02_Osteos,21377.0,11783.0,1467.0,251893833.0,88.2,19.5,95.8,90.7,95.4,84.5,65.3,3.4,26.0,35.9,56.7,4.6,60.2,29459.0,2199.0
CIPPST_OST_102_003,02_Osteos,5176.0,57307.0,1236.0,296619547.0,84.5,30.0,95.5,87.7,95.2,70.2,20.6,3.7,9.3,7.6,15.7,1.1,56.0,27451.0,1810.0
CIPPST_OST_103_001,02_Osteos,45498.0,5269.0,963.0,239708717.0,87.2,16.1,95.6,89.9,95.2,79.5,65.2,6.0,21.7,37.5,50.9,7.8,75.4,29701.0,1186.0
CIPPST_OST_103_002,02_Osteos,2781.0,76354.0,1646.0,212339562.0,83.4,40.3,95.2,89.5,95.0,79.3,21.1,2.8,9.2,9.1,16.9,1.2,51.8,25891.0,2677.0
CIPPST_OST_104_001,02_Osteos,1273.0,194146.0,475.0,247147321.0,80.7,25.9,95.2,87.8,95.0,73.7,8.7,3.0,1.9,3.8,4.7,1.0,12.6,21196.0,546.0
CIPPST_OST_104_002,02_Osteos,4752.0,55636.0,920.0,264381807.0,77.7,37.1,95.4,88.2,95.3,75.4,14.4,2.7,5.5,6.2,10.7,0.9,42.5,25274.0,1212.0
CIPPST_OST_105_001,02_Osteos,1518.0,218257.0,680.0,331314475.0,83.0,65.2,94.5,77.4,94.4,36.6,12.0,7.8,1.7,2.5,3.7,0.5,57.4,23342.0,974.0
CIPPST_OST_106_001,02_Osteos,9729.0,22043.0,2070.0,214452226.0,90.0,34.6,95.0,88.6,94.6,80.6,64.8,7.7,33.8,23.3,49.4,6.8,86.7,31389.0,3799.0
CIPPST_OST_107_001,02_Osteos,3881.0,70293.0,1961.0,272807092.0,91.5,43.4,95.7,88.4,95.3,75.5,56.5,10.9,24.7,21.0,42.1,2.9,71.2,28808.0,3609.0
CIPPST_OST_108_001,02_Osteos,2204.0,104469.0,3262.0,230250206.0,89.3,48.6,95.5,90.7,95.2,84.1,62.5,8.9,21.9,31.7,48.8,4.1,53.0,29066.0,7266.0
CIPPST_OST_109_001,02_Osteos,3075.0,77993.0,2089.0,239827515.0,90.0,54.6,95.7,91.4,95.2,86.9,73.4,9.9,28.2,35.4,57.3,5.7,60.5,29670.0,4178.0
CIPPST_OST_110_001,02_Osteos,189.0,1447743.0,1098.0,273623447.0,89.7,87.5,95.4,83.7,95.2,56.9,22.1,14.6,3.0,4.5,6.9,0.5,39.0,16866.0,1665.0
CIPPST_STS_201_001,01_STS,9778.0,26832.0,970.0,262359215.0,91.4,38.2,95.7,89.3,95.3,79.5,68.0,7.2,33.4,27.5,54.6,5.1,77.8,31035.0,1507.0
CIPPST_STS_201_002,01_STS,4040.0,69085.0,2452.0,279102862.0,89.1,55.3,95.7,89.9,95.3,83.2,72.4,5.4,27.6,39.3,58.7,6.9,60.4,28862.0,5050.0
CIPPST_STS_202_001,01_STS,13410.0,21152.0,555.0,283644956.0,87.9,71.5,95.8,91.4,95.5,85.7,74.5,5.7,39.0,29.8,60.6,7.4,83.8,28744.0,700.0
CIPPST_STS_202_002,01_STS,6947.0,47365.0,857.0,329043145.0,88.0,81.7,95.7,92.7,95.4,91.6,78.2,4.8,34.1,39.3,66.1,6.5,74.9,27326.0,1222.0
CIPPST_STS_203_001,01_STS,2362.0,81717.0,2931.0,193015855.0,89.4,63.5,95.6,89.8,95.4,80.5,69.5,6.2,33.8,29.5,56.9,5.6,72.0,29909.0,6910.0
CIPPST_STS_203_002,01_STS,6461.0,41851.0,2179.0,270397962.0,89.8,52.7,95.7,90.3,95.4,82.3,71.9,5.4,41.3,25.3,59.4,6.4,83.1,31813.0,4746.0
CIPPST_STS_204_001,01_STS,15651.0,13327.0,1101.0,208583802.0,90.8,19.9,95.3,83.1,95.1,54.4,32.1,3.6,14.7,13.8,25.8,2.4,66.1,29917.0,1388.0
CIPPST_STS_204_002,01_STS,11572.0,20750.0,1125.0,240118367.0,89.1,32.7,95.5,84.5,95.4,57.2,29.0,3.4,13.0,12.6,23.2,2.1,54.8,28651.0,1468.0
CIPPST_STS_205_001,01_STS,11245.0,18516.0,1667.0,208214110.0,88.8,35.7,95.2,90.3,94.8,88.9,78.4,4.6,35.2,38.6,66.4,6.6,73.2,30628.0,2942.0
CIPPST_STS_206_001,01_STS,9543.0,21576.0,1729.0,205895330.0,91.1,41.1,94.9,89.6,94.6,84.7,65.2,5.3,31.2,28.6,54.5,4.4,75.2,29187.0,3156.0
CIPPST_STS_207_001,01_STS,7117.0,35031.0,1791.0,249315315.0,89.0,48.1,95.1,90.8,94.9,87.5,73.1,8.2,31.1,33.8,58.7,5.5,73.0,29215.0,3554.0
CIPPST_STS_207_002,01_STS,9539.0,21335.0,908.0,203514005.0,88.2,57.0,95.2,91.2,94.8,90.9,76.7,6.8,39.8,30.1,62.7,6.4,81.6,28864.0,1571.0
CIPPST_STS_208_001,01_STS,3356.0,78182.0,1266.0,262377585.0,91.1,76.2,94.5,86.2,94.1,69.7,41.2,3.8,22.3,15.1,34.6,2.4,74.6,26175.0,2550.0
CIPPST_STS_208_002,01_STS,1529.0,136870.0,460.0,209273925.0,87.6,87.1,94.4,82.5,94.0,58.4,15.6,3.9,3.8,7.9,10.0,1.7,58.3,22193.0,571.0
CIPPST_STS_209_001,01_STS,5141.0,50126.0,1530.0,257697488.0,85.0,59.4,94.9,91.1,94.6,88.1,43.8,6.5,21.8,15.6,33.8,3.1,78.8,28828.0,2489.0
CIPPST_STS_210_001,01_STS,17498.0,30799.0,2600.0,538917400.0,87.0,29.3,94.6,86.9,94.4,74.9,65.4,6.8,33.0,25.6,52.1,5.9,80.6,31263.0,6271.0
CIPPST_STS_211_001,01_STS,10219.0,47166.0,1611.0,481985826.0,90.0,33.8,94.3,84.4,94.2,63.4,46.7,8.3,21.2,17.2,34.3,3.6,68.3,30947.0,2857.0
CIPPST_STS_211_002,01_STS,4387.0,109936.0,3317.0,482287061.0,90.0,53.3,94.1,83.2,93.9,60.1,42.7,4.4,23.0,15.3,33.6,4.3,79.1,31230.0,9770.0
CIPPST_STS_212_001,01_STS,9525.0,46751.0,996.0,445303523.0,89.0,41.0,94.1,88.0,94.0,78.1,52.0,8.1,23.7,20.2,40.3,3.0,73.3,32042.0,1511.0
CIPPST_STS_212_002,01_STS,17885.0,25797.0,2770.0,461384895.0,88.4,34.9,94.5,88.5,94.3,80.9,72.4,7.2,37.8,27.4,58.3,6.2,82.7,31826.0,5534.0
CIPPST_STS_213_001,01_STS,2784.0,190622.0,1359.0,530692664.0,89.9,78.6,94.6,86.5,94.4,72.7,48.4,4.9,23.3,20.2,40.0,2.9,58.2,28388.0,2599.0
CIPPST_STS_213_002,05_NewSamples,14352.0,19121.0,2418.0,274429035.0,89.8,31.8,94.8,91.3,94.7,89.5,76.4,6.0,36.1,34.3,65.2,4.2,68.7,30038.0,4703.0
CIPPST_STS_214_001,01_STS,6962.0,61585.0,2544.0,428755459.0,89.4,40.6,94.3,86.0,94.2,68.9,42.1,3.8,23.3,15.0,34.7,2.9,62.3,30179.0,5010.0
CIPPST_STS_214_002,01_STS,10493.0,43983.0,2759.0,461517480.0,89.0,42.0,94.2,88.2,94.1,79.3,59.4,5.0,33.5,20.8,48.6,4.9,74.6,31726.0,6145.0
CIPPST_STS_215_001,01_STS,8091.0,28536.0,1311.0,230881538.0,90.7,27.7,95.6,87.7,95.1,71.8,54.9,8.9,27.9,18.1,41.1,4.1,80.0,30107.0,2272.0
CIPPST_STS_216_001,01_STS,3852.0,71628.0,854.0,275909218.0,87.5,32.8,95.0,85.0,94.7,63.3,12.1,2.8,4.1,5.2,8.4,0.7,41.2,24954.0,1069.0
CIPPST_STS_217_001,01_STS,1917.0,138919.0,1817.0,266308528.0,88.2,82.0,95.0,89.1,94.8,81.5,54.5,5.1,31.3,18.1,43.9,4.9,81.3,28834.0,4309.0
CIPPST_STS_219_001,01_STS,10267.0,19416.0,1769.0,199342598.0,90.0,40.2,95.2,90.3,94.9,89.4,79.3,7.7,40.3,31.4,64.3,6.4,81.4,29740.0,3209.0
CIPPST_STS_220_001,01_STS,15880.0,16472.0,1360.0,261572689.0,89.2,31.5,95.0,90.1,94.5,88.0,66.3,5.1,25.8,35.3,54.2,6.3,80.8,31679.0,1997.0
CIPPST_STS_222_001,01_STS,1437.0,153231.0,2088.0,220192350.0,89.5,83.4,95.0,91.9,94.6,93.2,70.7,5.2,23.1,42.4,59.4,5.4,60.6,25957.0,4252.0
CIPPST_STS_223_001,01_STS,12456.0,21091.0,2565.0,262707014.0,88.8,39.7,95.1,91.3,94.9,90.5,69.5,6.4,30.1,33.0,56.2,6.3,81.8,31160.0,4845.0
CIPPST_STS_224_001,01_STS,8375.0,30828.0,1880.0,258180838.0,87.9,42.1,95.6,89.1,95.1,79.1,57.7,4.9,26.3,26.5,47.3,4.7,73.4,29574.0,3604.0
CIPPST_STS_225_001,01_STS,4097.0,50057.0,1826.0,205082645.0,90.2,56.8,94.5,87.6,94.3,76.7,46.0,4.4,21.5,20.1,37.4,3.7,73.4,28288.0,3643.0
CIPPST_STS_226_001,05_NewSamples,16434.0,16233.0,1471.0,266771069.0,90.4,25.5,94.8,88.4,94.7,79.8,70.2,6.8,28.0,35.4,58.4,4.0,75.4,29787.0,2396.0
CIPPST_STS_227_001,05_NewSamples,14114.0,19214.0,1836.0,271189222.0,89.8,31.6,94.8,90.4,94.7,86.2,76.6,4.5,24.3,47.7,66.2,4.9,62.2,29572.0,3158.0
CIPPST_STS_228_001,01_STS,3363.0,74919.0,485.0,251951370.0,76.4,39.9,95.1,87.0,95.0,73.5,11.1,5.8,1.5,3.8,4.8,0.4,37.0,20847.0,573.0
CIPPST_STS_229_001,01_STS,16303.0,15584.0,1253.0,254070236.0,89.9,27.0,95.7,88.5,95.3,79.5,64.3,5.3,27.7,31.2,54.0,4.2,65.3,29752.0,1890.0
CIPPST_STS_230_001,01_STS,12556.0,20021.0,2208.0,251380411.0,90.7,26.3,95.7,89.0,95.2,77.6,69.0,6.7,34.2,28.0,56.4,5.0,75.9,29838.0,4070.0
CIPPST_STS_231_001,01_STS,15160.0,15563.0,1326.0,235931130.0,89.7,17.9,95.6,89.1,95.3,77.3,61.3,5.2,24.4,31.7,52.1,3.2,57.1,29366.0,2016.0
CIPPST_STS_232_001,01_STS,10273.0,21034.0,1421.0,216083484.0,89.6,22.4,95.7,89.0,95.4,78.3,63.1,5.8,28.2,29.2,52.8,3.7,62.1,29479.0,2331.0
CIPPST_STS_233_001,05_NewSamples,12397.0,20910.0,2192.0,259215166.0,90.5,30.4,94.6,88.8,94.5,80.7,71.0,7.4,37.1,26.5,58.3,4.6,79.6,30175.0,4202.0
CIPPST_STS_234_001,05_NewSamples,11424.0,28481.0,2591.0,325366897.0,89.7,31.0,94.7,88.2,94.6,77.0,63.9,5.8,35.9,22.2,53.0,4.4,67.2,30925.0,5254.0
CIPPST_STS_235_001,05_NewSamples,15851.0,16568.0,1506.0,262627081.0,85.0,31.0,94.9,90.7,94.8,86.6,78.4,7.9,32.1,38.5,63.4,6.3,41.5,28863.0,2073.0
CIPPST_STS_235_002,05_NewSamples,4255.0,71738.0,2842.0,305245247.0,89.7,55.8,94.6,90.1,94.5,83.4,54.1,6.1,26.6,21.4,44.5,2.9,54.7,27756.0,6176.0
CIPPST_STS_239_001,01_STS,8834.0,26076.0,1276.0,230351133.0,91.0,29.2,95.5,85.5,95.1,63.1,47.1,5.8,25.8,15.5,37.9,2.7,74.7,29452.0,2100.0
CIPPST_STS_240_001,01_STS,1517.0,162153.0,2522.0,245985928.0,89.6,54.0,95.3,83.4,94.9,57.0,24.2,3.6,10.7,9.9,18.9,1.4,66.7,27273.0,6332.0
CIPPST_STS_242_001,05_NewSamples,4021.0,38627.0,567.0,155319905.0,92.1,46.1,92.8,74.0,91.5,17.8,9.8,1.9,4.6,3.3,7.1,0.6,67.3,22303.0,776.0
CIPPST_STS_243_001,05_NewSamples,14465.0,15620.0,1697.0,225944590.0,90.2,24.7,94.6,89.8,94.5,85.2,71.6,7.4,34.1,30.2,59.2,4.2,72.3,31269.0,2698.0
CIPPST_STS_243_002,05_NewSamples,17203.0,12655.0,1482.0,217702469.0,88.6,23.5,94.6,88.2,94.5,84.6,67.9,7.0,38.7,22.1,54.9,5.2,77.1,31992.0,2367.0
CIPPST_STS_244_001,05_NewSamples,21806.0,10333.0,1798.0,225330270.0,90.1,18.3,94.7,87.3,94.7,79.0,70.2,7.1,33.5,29.7,57.4,5.0,72.7,30487.0,2768.0
CIPPST_STS_245_001,05_NewSamples,747.0,356134.0,240.0,266031860.0,89.6,45.5,94.7,80.4,94.7,44.9,14.2,11.6,1.2,1.4,1.9,0.6,23.4,27134.0,317.0
CIPPST_STS_246_001,05_NewSamples,12414.0,22403.0,1804.0,278116078.0,90.3,38.1,94.7,89.9,94.6,82.1,64.3,9.3,30.4,24.6,50.0,4.3,75.4,31726.0,2894.0
CIPPST_STS_247_001,05_NewSamples,13901.0,19705.0,1900.0,273925773.0,88.5,44.7,94.9,92.9,94.8,92.8,79.1,4.7,27.8,46.6,69.0,4.6,63.4,29545.0,3325.0
CIPPST_STS_248_001,05_NewSamples,15732.0,15149.0,1874.0,238317549.0,90.2,27.4,94.9,89.5,94.7,83.9,74.0,3.6,18.6,51.7,66.3,3.3,54.3,29328.0,3178.0
