# Supplementary material
Source: Research Square preprint supplement (doi:10.21203/rs.3.rs-10374394/v1)
Supplement: Supplementary file 5 [file a45759fd4aaaf001e2897ff2.xlsx]

## Sheet: Antibody List
Antigen	Clone	Dilution	Order No.	Fluorochrome	Company
Actin	REAL650	50	130-123-363	FITC	Miltenyi Biotec
CD105	REA794	50	130-112-169	FITC	Miltenyi Biotec
CD117	REA787	50	130-111-592	PE	Miltenyi Biotec
CD117	REA787	50	130-111-593	APC	Miltenyi Biotec
CD11b	REA713	50	130-110-552	FITC	Miltenyi Biotec
CD11c	REA618	50	130-113-587	PE	Miltenyi Biotec
CD123	REA918	50	130-115-263	FITC	Miltenyi Biotec
CD123	REA918	50	130-115-265	APC	Miltenyi Biotec
CD138	REA929	50	130-115-479	PE	Miltenyi Biotec
CD138	REA929	50	130-115-480	APC	Miltenyi Biotec
CD14	REA1314	50	130-128-771	PE	Miltenyi
CD15	VIMC6	50	130-113-484	FITC	Miltenyi Biotec
CD16	REA1324	50	130-128-774	PE	Miltenyi Biotec
CD19	LT19	50	130-113-168	FITC	Miltenyi Biotec
CD20	REA1087	50	130-118-292	FITC	Miltenyi Biotec
CD3	REA1151	50	130-120-267	FITC	Miltenyi Biotec
CD3	REA1151	50	130-120-269	APC	Miltenyi Biotec
CD314 (NKG2D)	REA1228	50	130-124-341	PE	Miltenyi Biotec
CD38	REA671	50	130-117-717	PE	Miltenyi Biotec
CD38	REA671	50	130-123-852	APC	Miltenyi Biotec
CD45	REA747	50	130-110-632	PE	Miltenyi Biotec
CD56	AF12-7H3	50	130-113-307	PE	Miltenyi Biotec
CD68	REA1306	50	130-128-345	PE	Miltenyi Biotec
CD79a	REA1142	50	130-119-723	APC	Miltenyi Biotec
CD99	REA1174	50	130-121-078	PE	Miltenyi Biotec
CollagenIII	REAL912	50	130-127-357	PE	Miltenyi Biotec
CollagenIV	REAL567	50	130-122-866	PE	Miltenyi Biotec
Cytokeratin	REA831	50	130-112-743	FITC	Miltenyi Biotec
Cytokeratin	REA831	50	130-112-745	APC	Miltenyi Biotec
Desmin	REA1134	50	130-119-489	FITC	Miltenyi Biotec
Desmin	REA1134	50	130-119-491	APC	Miltenyi Biotec
Fibronectin	REAL555	50	130-122-864	PE	Miltenyi Biotec
FSP1	NBP2-36431	200	NBP2-36431F	FITC	Novus Biologicals
HLA-DR	REA805	50	130-111-789	PE	Miltenyi Biotec
HLA-DR	REA805	50	130-111-789	APC	Miltenyi Biotec
Podoplanin	REAL468	50	130-125-009	FITC	Miltenyi Biotec
Vimentin	REA409	50	130-123-774	PE	Miltenyi Biotec
Vimentin	REA409	50	130-123-774	APC	Miltenyi Biotec
